# Supplementary material for: Vibrational properties and matrix photochemistry of trimethyldioxorhenium(vii), (CH3)3ReO2Electronic supplementary information (ESI) available: further details concerning the vibrational calculations and cartesion coordinates of the optimised geometries. See http://www.rsc.org/suppdata/dt/b2/b204238j/
Source: Royal Society of Chemistry journal article supplement (doi:10.1039/b204238j), 2002-08-07
Supplement: b204238j-1.pdf [file b204238j-1.pdf]

ReO2CD3CD2

\*\*\*\*\*  
 \* F R E Q U E N C I E S \*  
 \*\*\*\*\*

Coordinates (Cartesian)

```

=====
Atom          bohr
angstrom      Geometric Variables
              X          Y          Z          X
Y            Z          (0:frozen, *:LT par.)
-----
  1 Re          1.689724    0.000000    0.000000    0.894163
0.000000      0.000000    1          2          3
  2 O           3.144271    0.569278    2.856530    1.663876
0.301249      1.511610    4          5          6
  3 O           3.144271    0.569278   -2.856530    1.663876
0.301249     -1.511610    7          8          9
  4 C           0.156052   -3.229801    0.000000    0.082579
-1.709136     0.000000   10         11         12
  5 H          -0.180699   -4.278201    1.751561   -0.095622
-2.263926     0.926886   13         14         15
  6 H          -0.180699   -4.278201   -1.751561   -0.095622
-2.263926    -0.926886   16         17         18
  7 C          -1.535315    2.345550    0.000000   -0.812454
1.241211      0.000000   19         20         21
  8 H          -0.870744    4.315431    0.000000   -0.460778
2.283627      0.000000   22         23         24
  9 H          -2.683429    1.993333   -1.688484   -1.420009
1.054826     -0.893507   25         26         27
 10 H          -2.683429    1.993333    1.688484   -1.420009
1.054826      0.893507   28         29         30
-----
    
```

Atomic Masses:

```

-----
  1. Re          186.95575000
  2. O           15.99491400
  3. O           15.99491400
  4. C           12.00000000
  5. H            2.00000000
  6. H            2.00000000
  7. C           12.00000000
  8. H            2.00000000
  9. H            2.00000000
 10. H            2.00000000
    
```

```

=====
Normal Modes in Symmetry Displacements *** (cartesians, not
mass-weighted) ***
=====
    
```

=== AA ===

Symmetry Displacements

|        |        |        | 1      |       |       | 2      |        |       |  |
|--------|--------|--------|--------|-------|-------|--------|--------|-------|--|
| 3      | -----  |        |        |       |       |        | -----  |       |  |
|        | 1.Re   | 0.037  | 0.000  | 0.000 | 0.000 | 0.037  | 0.000  | 0.000 |  |
| 0.000  | 0.000  | 0.000  |        |       |       | 0.003  | -0.118 | 0.000 |  |
|        | 2.O    | -0.105 | -0.002 | 0.000 | 0.000 | 0.003  | -0.118 | 0.000 |  |
| 0.000  | 0.000  | 0.177  |        |       |       | 0.003  | -0.118 | 0.000 |  |
|        | 3.O    | -0.105 | -0.002 | 0.000 | 0.000 | 0.003  | -0.118 | 0.000 |  |
| 0.000  | 0.000  | -0.177 |        |       |       | -0.023 | -0.098 | 0.000 |  |
|        | 4.C    | -0.110 | 0.002  | 0.000 | 0.000 | -0.030 | -0.096 | 0.000 |  |
| 0.000  | 0.000  | 0.000  |        |       |       | -0.030 | -0.096 | 0.000 |  |
|        | 5.H    | -0.111 | 0.002  | 0.000 | 0.000 | 0.015  | -0.087 | 0.000 |  |
| 0.000  | 0.000  | 0.000  |        |       |       | 0.028  | -0.091 | 0.000 |  |
|        | 6.H    | -0.111 | 0.002  | 0.000 | 0.000 | 0.013  | -0.079 | 0.000 |  |
| 0.000  | 0.000  | 0.000  |        |       |       | 0.013  | -0.079 | 0.000 |  |
|        | 7.C    | -0.103 | 0.004  | 0.000 | 0.000 |        |        |       |  |
| 0.000  | 0.000  | 0.000  |        |       |       |        |        |       |  |
|        | 8.H    | -0.101 | 0.003  | 0.000 | 0.000 |        |        |       |  |
| 0.000  | 0.000  | 0.000  |        |       |       |        |        |       |  |
|        | 9.H    | -0.104 | 0.005  | 0.000 | 0.000 |        |        |       |  |
| 0.000  | 0.000  | 0.000  |        |       |       |        |        |       |  |
|        | 10.H   | -0.104 | 0.005  | 0.000 | 0.000 |        |        |       |  |
| 0.000  | 0.000  | 0.000  |        |       |       |        |        |       |  |
|        |        |        | 4      |       |       | 5      |        |       |  |
| 6      | -----  |        |        |       |       |        | -----  |       |  |
|        | 1.Re   | 0.000  | 0.000  | 0.000 | 0.000 | 0.000  | 0.000  | 0.000 |  |
| 0.000  | 0.000  | 0.000  |        |       |       | 0.000  | 0.095  | 0.000 |  |
|        | 2.O    | 0.126  | 0.012  | 0.000 | 0.000 | 0.000  | 0.095  | 0.000 |  |
| 0.000  | 0.000  | 0.000  |        |       |       | 0.000  | 0.095  | 0.000 |  |
|        | 3.O    | 0.126  | 0.012  | 0.000 | 0.000 | -0.103 | -0.126 | 0.000 |  |
| 0.000  | 0.000  |        |        |       |       | -0.140 | -0.114 | 0.000 |  |
|        | 4.C    | -0.101 | -0.005 | 0.000 | 0.000 | -0.140 | -0.114 | 0.000 |  |
| 0.172  | -0.050 | 0.000  |        |       |       | 0.095  | -0.066 | 0.000 |  |
|        | 5.H    | -0.095 | -0.007 | 0.000 | 0.000 | 0.164  | -0.090 | 0.000 |  |
| -0.363 | -0.034 | 0.000  |        |       |       | 0.082  | -0.026 | 0.000 |  |
|        | 6.H    | -0.095 | -0.007 | 0.000 | 0.000 | 0.082  | -0.026 | 0.000 |  |
| -0.363 | -0.034 | 0.000  |        |       |       |        |        |       |  |
|        | 7.C    | -0.134 | -0.015 | 0.000 | 0.000 |        |        |       |  |
| -0.041 | 0.032  | 0.000  |        |       |       |        |        |       |  |
|        | 8.H    | -0.145 | -0.011 | 0.000 | 0.000 |        |        |       |  |
| 0.055  | 0.000  | 0.000  |        |       |       |        |        |       |  |
|        | 9.H    | -0.132 | -0.022 | 0.000 | 0.000 |        |        |       |  |
| -0.058 | 0.088  | 0.000  |        |       |       |        |        |       |  |
|        | 10.H   | -0.132 | -0.022 | 0.000 | 0.000 |        |        |       |  |
| -0.058 | 0.088  | 0.000  |        |       |       |        |        |       |  |



Supplementary Material (ESI) for Dalton Transactions  
 This journal is © The Royal Society of Chemistry 2002

|      |        |        |       |       |       |        |
|------|--------|--------|-------|-------|-------|--------|
| 7.C  | 0.000  | 0.000  | 0.000 | 0.000 | 0.000 | 0.000  |
| 8.H  | 0.355  | 0.455  | 0.000 | 0.000 | 0.000 | 0.000  |
| 9.H  | -0.178 | -0.228 | 0.000 | 0.000 | 0.000 | 0.500  |
| 10.H | -0.178 | -0.228 | 0.000 | 0.000 | 0.000 | -0.500 |

Largest computed component in inactive z Dipole derivative= 0.3361E-17  
 (symmetry index= 1)  
 Deviation may result from numerical integration and/or the non-linearity  
 in the transformations between Cartesian and Z-matrix coordinates.

Frequencies and Normal Modes

```

=====

```

| 6           | 1<br>7      | 2<br>8      | 3           | 4           | 5           |             |
|-------------|-------------|-------------|-------------|-------------|-------------|-------------|
|             | 182.6575    | 210.5137    | 281.6502    | 490.8630    | 572.6299    |             |
| 647.1731    | 694.0383    | 933.4117    |             |             |             |             |
|             | -----       | -----       | -----       | -----       | -----       |             |
| 1           | 0.40162204  | -0.41664448 | -0.46404707 | 0.47209861  | 0.01146907  |             |
| -0.15239310 | 0.23947550  | -0.01676881 |             |             |             |             |
| 2           | 0.26336185  | 0.61465646  | -0.29350402 | -0.36377067 | -0.07834824 |             |
| 0.05048871  | 0.52417633  | 0.02331611  |             |             |             |             |
| 3           | 0.00974768  | -0.07204251 | -0.53518593 | 0.03130989  | -0.00134529 |             |
| -0.02929834 | 0.03657732  | -0.03455270 |             |             |             |             |
| 4           | 0.57332174  | 0.15528540  | 0.58062692  | 0.35686744  | -0.09505741 |             |
| -0.10836178 | 0.17443555  | -0.06484478 |             |             |             |             |
| 5           | -0.07177369 | -0.61336064 | 0.25879409  | -0.43678599 | -0.02816167 |             |
| 0.05876357  | 0.54705617  | 0.04442511  |             |             |             |             |
| 6           | -0.09419509 | -0.01854088 | -0.01903688 | 0.25836098  | -0.47950238 |             |
| 0.76860041  | 0.16840025  | -0.04007859 |             |             |             |             |
| 7           | 0.40134758  | -0.14238945 | -0.04142488 | -0.38820378 | -0.18197592 |             |
| -0.17738063 | -0.12451201 | 0.02054317  |             |             |             |             |
| 8           | 0.17366121  | -0.01577600 | 0.00102038  | -0.00067069 | 0.25058387  |             |
| 0.23012258  | -0.08303713 | 0.72806917  |             |             |             |             |
| 9           | -0.12469188 | 0.05251323  | 0.03859340  | 0.09106701  | 0.43524256  |             |
| 0.03693765  | 0.22746884  | -0.44263539 |             |             |             |             |
| 10          | 0.00073677  | 0.00500047  | -0.00946334 | 0.00031010  | -0.03258366 |             |
| 0.02022460  | -0.17566625 | 0.00926568  |             |             |             |             |
| 11          | -0.45304840 | 0.11772725  | 0.04477435  | 0.25810611  | -0.38361499 |             |
| -0.51911800 | 0.33032664  | 0.29291624  |             |             |             |             |
| 12          | 0.11980726  | -0.07445015 | -0.04785904 | -0.18004471 | -0.56189838 |             |
| -0.10582160 | -0.30677116 | -0.18299632 |             |             |             |             |
| 13          | 0.00489530  | -0.00217157 | 0.00207616  | -0.02429366 | 0.05493633  |             |
| 0.01748983  | -0.01267029 | -0.20685439 |             |             |             |             |
| 14          | 0.01029389  | 0.00570722  | 0.00563236  | 0.01748614  | 0.04078157  |             |
| 0.01566888  | -0.01058384 | 0.31875000  |             |             |             |             |
|             | 9           | 10          | 11          | 12          | 13          | 14          |
|             | 983.7164    | 1016.6002   | 1030.6597   | 2123.1404   | 2197.4819   | 2262.2749   |
|             | -----       | -----       | -----       | -----       | -----       | -----       |
| 1           | 0.36880831  | -0.04969710 | 0.08587947  | 0.00006564  | 0.00630333  | 0.00102034  |
| 2           | 0.14618601  | -0.01620368 | 0.16887069  | -0.00063220 | 0.01476820  | -0.00187808 |
| 3           | -0.83397252 | 0.09048891  | 0.01385313  | -0.00196954 | 0.00491940  | 0.00042187  |
| 4           | -0.34624038 | 0.03723553  | 0.07684992  | -0.00329576 | 0.00968703  | 0.00404454  |
| 5           | -0.10467877 | 0.01773144  | 0.20894080  | 0.00136034  | 0.02130025  | -0.00259552 |
| 6           | -0.00422913 | -0.04554199 | -0.21911806 | -0.00467573 | -0.15134076 | -0.00246792 |
| 7           | 0.01046254  | -0.05209930 | -0.64147898 | 0.00030459  | -0.41400851 | 0.00074747  |

Supplementary Material (ESI) for Dalton Transactions  
 This journal is © The Royal Society of Chemistry 2002

|    |             |             |             |             |             |             |
|----|-------------|-------------|-------------|-------------|-------------|-------------|
| 8  | -0.06360535 | -0.21836006 | 0.01960156  | 0.23298372  | 0.02150863  | -0.45826612 |
| 9  | -0.04940312 | -0.41127099 | -0.17208144 | -0.24679987 | -0.20960864 | -0.47686533 |
| 10 | 0.00544118  | 0.03713582  | 0.55737023  | -0.00504131 | -0.80954273 | 0.00380747  |
| 11 | -0.03136464 | -0.13126535 | -0.14784869 | 0.11223115  | -0.17530848 | -0.13153673 |
| 12 | -0.00327513 | -0.37330604 | 0.29964030  | -0.13402664 | 0.27263975  | -0.41161220 |
| 13 | -0.05771569 | -0.57345633 | 0.04140825  | 0.70250482  | -0.00232653 | 0.35452406  |
| 14 | -0.07273951 | -0.52815332 | 0.02879783  | -0.60055977 | 0.00588317  | 0.50012879  |

Intensities

=====

| Intensity (degeneracy not counted) | Frequency   | Dipole Strength |          | Absorption |
|------------------------------------|-------------|-----------------|----------|------------|
|                                    | cm-1        | 1e-40           | esu2 cm2 | km/mole    |
|                                    | 182.657540  | 81.541441       |          | 3.733310   |
|                                    | 210.513673  | 92.160118       |          | 4.862968   |
|                                    | 281.650180  | 14.604869       |          | 1.031064   |
|                                    | 490.863008  | 67.538693       |          | 8.309809   |
|                                    | 572.629903  | 79.108350       |          | 11.354667  |
|                                    | 647.173090  | 94.465219       |          | 15.323941  |
|                                    | 694.038275  | 35.893367       |          | 6.244184   |
|                                    | 933.411687  | 1.154451        |          | 0.270101   |
|                                    | 983.716356  | 218.216902      |          | 53.806699  |
|                                    | 1016.600163 | 5.915107        |          | 1.507269   |
|                                    | 1030.659726 | 45.444263       |          | 11.740117  |
|                                    | 2123.140397 | 0.623551        |          | 0.331840   |
|                                    | 2197.481944 | 12.495525       |          | 6.882685   |
|                                    | 2262.274902 | 2.059579        |          | 1.167890   |

=== AAA ===

Symmetry Displacements

| 3      | 1      |        |        | 2      |        |        |        |
|--------|--------|--------|--------|--------|--------|--------|--------|
|        | -----  |        |        | -----  |        |        |        |
|        | 1.Re   | 0.000  | 0.000  | 0.037  | 0.000  | 0.000  | 0.000  |
| 0.000  | 0.000  | 0.000  |        |        |        |        |        |
|        | 2.O    | 0.021  | -0.003 | -0.119 | 0.113  | 0.028  | 0.091  |
| 0.068  | -0.056 | 0.000  |        |        |        |        |        |
|        | 3.O    | -0.021 | 0.003  | -0.119 | -0.113 | -0.028 | 0.091  |
| -0.068 | 0.056  | 0.000  |        |        |        |        |        |
|        | 4.C    | 0.000  | 0.000  | -0.101 | 0.000  | 0.000  | -0.097 |
| 0.000  | 0.000  | 0.086  |        |        |        |        |        |
|        | 5.H    | 0.013  | -0.002 | -0.099 | 0.069  | 0.017  | -0.074 |
| -0.242 | -0.034 | 0.019  |        |        |        |        |        |
|        | 6.H    | -0.013 | 0.002  | -0.099 | -0.069 | -0.017 | -0.074 |
| 0.242  | 0.034  | 0.019  |        |        |        |        |        |
|        | 7.C    | 0.000  | 0.000  | -0.083 | 0.000  | 0.000  | -0.086 |
| 0.000  | 0.000  | -0.039 |        |        |        |        |        |
|        | 8.H    | 0.000  | 0.000  | -0.086 | 0.000  | 0.000  | -0.132 |
| 0.000  | 0.000  | 0.092  |        |        |        |        |        |
|        | 9.H    | -0.012 | 0.002  | -0.075 | -0.067 | -0.017 | -0.037 |
| 0.233  | 0.033  | -0.205 |        |        |        |        |        |
|        | 10.H   | 0.012  | -0.002 | -0.075 | 0.067  | 0.017  | -0.037 |
| -0.233 | -0.033 | -0.205 |        |        |        |        |        |

| 6      |        |        | 4      |        |        | 5      |       |  |
|--------|--------|--------|--------|--------|--------|--------|-------|--|
| 1.Re   | 0.000  | 0.000  | 0.000  | 0.000  | 0.000  | 0.000  | 0.000 |  |
| 0.000  | 0.000  | 0.000  |        |        |        |        |       |  |
| 2.O    | 0.000  | 0.118  | 0.000  | 0.000  | 0.000  | 0.000  | 0.000 |  |
| 0.000  | 0.000  | 0.000  |        |        |        |        |       |  |
| 3.O    | 0.000  | -0.118 | 0.000  | 0.000  | 0.000  | 0.000  | 0.000 |  |
| 0.000  | 0.000  | 0.000  |        |        |        |        |       |  |
| 4.C    | 0.000  | 0.000  | -0.070 | 0.000  | 0.000  | 0.000  | 0.162 |  |
| 0.000  | 0.000  | 0.000  |        |        |        |        |       |  |
| 5.H    | -0.134 | -0.090 | -0.149 | 0.092  | -0.070 | -0.375 |       |  |
| 0.024  | 0.064  | -0.074 |        |        |        |        |       |  |
| 6.H    | 0.134  | 0.090  | -0.149 | -0.092 | 0.070  | -0.375 |       |  |
| -0.024 | -0.064 | -0.074 |        |        |        |        |       |  |
| 7.C    | 0.000  | 0.000  | 0.086  | 0.000  | 0.000  | -0.040 |       |  |
| 0.000  | 0.000  | 0.176  |        |        |        |        |       |  |
| 8.H    | 0.000  | 0.000  | 0.238  | 0.000  | 0.000  | 0.003  |       |  |
| 0.000  | 0.000  | -0.376 |        |        |        |        |       |  |
| 9.H    | 0.129  | 0.087  | -0.020 | -0.089 | 0.067  | 0.006  |       |  |
| -0.023 | -0.061 | -0.267 |        |        |        |        |       |  |
| 10.H   | -0.129 | -0.087 | -0.020 | 0.089  | -0.067 | 0.006  |       |  |
| 0.023  | 0.061  | -0.267 |        |        |        |        |       |  |

| 9      |        |        | 7      |        |        | 8      |       |  |
|--------|--------|--------|--------|--------|--------|--------|-------|--|
| 1.Re   | 0.000  | 0.000  | 0.000  | 0.000  | 0.000  | 0.000  | 0.000 |  |
| 0.000  | 0.000  | 0.000  |        |        |        |        |       |  |
| 2.O    | 0.000  | 0.000  | 0.000  | 0.000  | 0.000  | 0.000  | 0.000 |  |
| 0.000  | 0.000  | 0.000  |        |        |        |        |       |  |
| 3.O    | 0.000  | 0.000  | 0.000  | 0.000  | 0.000  | 0.000  | 0.000 |  |
| 0.000  | 0.000  | 0.000  |        |        |        |        |       |  |
| 4.C    | 0.000  | 0.000  | 0.000  | 0.000  | 0.000  | 0.000  | 0.000 |  |
| 0.000  | 0.000  | 0.000  |        |        |        |        |       |  |
| 5.H    | 0.133  | -0.282 | 0.161  | 0.369  | 0.056  | 0.000  |       |  |
| 0.000  | 0.379  | 0.000  |        |        |        |        |       |  |
| 6.H    | -0.133 | 0.282  | 0.161  | -0.369 | -0.056 | 0.000  |       |  |
| 0.000  | -0.379 | 0.000  |        |        |        |        |       |  |
| 7.C    | 0.000  | 0.000  | 0.000  | 0.000  | 0.000  | 0.000  | 0.000 |  |
| 0.000  | 0.000  | 0.000  |        |        |        |        |       |  |
| 8.H    | 0.000  | 0.000  | 0.050  | 0.000  | 0.000  | 0.163  |       |  |
| 0.000  | 0.000  | 0.179  |        |        |        |        |       |  |
| 9.H    | -0.128 | 0.272  | -0.186 | 0.296  | -0.054 | -0.081 |       |  |
| -0.096 | 0.270  | -0.089 |        |        |        |        |       |  |
| 10.H   | 0.128  | -0.272 | -0.186 | -0.296 | 0.054  | -0.081 |       |  |
| 0.096  | -0.270 | -0.089 |        |        |        |        |       |  |

| 10   |       |       |       |
|------|-------|-------|-------|
| 1.Re | 0.000 | 0.000 | 0.000 |
| 2.O  | 0.000 | 0.000 | 0.000 |
| 3.O  | 0.000 | 0.000 | 0.000 |
| 4.C  | 0.000 | 0.000 | 0.000 |

Supplementary Material (ESI) for Dalton Transactions  
This journal is © The Royal Society of Chemistry 2002

|      |        |        |        |
|------|--------|--------|--------|
| 5.H  | 0.000  | 0.000  | 0.000  |
| 6.H  | 0.000  | 0.000  | 0.000  |
| 7.C  | 0.000  | 0.000  | 0.000  |
| 8.H  | 0.000  | 0.000  | 0.407  |
| 9.H  | -0.218 | -0.280 | -0.203 |
| 10.H | 0.218  | 0.280  | -0.203 |

Largest computed component in inactive x Dipole derivative= 0.7589E-17  
(symmetry index= 2)  
Deviation may result from numerical integration and/or the non-linearity  
in the transformations between Cartesian and Z-matrix coordinates.

Largest computed component in inactive y Dipole derivative= 0.1735E-17  
(symmetry index= 2)  
Deviation may result from numerical integration and/or the non-linearity  
in the transformations between Cartesian and Z-matrix coordinates.

Frequencies and Normal Modes

```
=====
```

| 6           | 1<br>7               | 2<br>8                | 3           | 4           | 5           |
|-------------|----------------------|-----------------------|-------------|-------------|-------------|
| 557.3518    | 123.7625<br>956.0002 | 186.3363<br>1014.8281 | 233.3123    | 395.3516    | 495.4477    |
| -----       | -----                | -----                 | -----       | -----       | -----       |
| 1           | -0.01485589          | 0.47492797            | 0.42615221  | -0.11588552 | -0.20448564 |
| 0.14260930  | 0.71856749           | -0.02625298           |             |             |             |
| 2           | 0.13237617           | 0.45913988            | 0.33194277  | -0.12926270 | -0.34255854 |
| 0.27787334  | -0.67096747          | 0.00237016            |             |             |             |
| 3           | -0.55960605          | 0.45073743            | -0.10868577 | -0.38132860 | 0.53361758  |
| -0.16165361 | -0.12156950          | 0.02787026            |             |             |             |
| 4           | -0.39628071          | -0.47530103           | 0.74752383  | -0.06825670 | 0.00234917  |
| -0.20516713 | -0.10660662          | 0.01101847            |             |             |             |
| 5           | 0.02821497           | 0.07764865            | 0.16701551  | 0.41669600  | 0.36415617  |
| 0.23703472  | -0.02359986          | -0.01412176           |             |             |             |
| 6           | 0.13254123           | 0.09766756            | 0.01019999  | -0.05196719 | -0.08840364 |
| -0.44493335 | -0.03072516          | -0.50568155           |             |             |             |
| 7           | -0.35719894          | 0.04280640            | 0.00403726  | 0.52771032  | 0.11018347  |
| 0.43445703  | -0.01936117          | -0.26985745           |             |             |             |
| 8           | -0.45111778          | 0.21491593            | -0.17971212 | 0.45101997  | -0.51101942 |
| -0.41626022 | -0.02833425          | 0.16342431            |             |             |             |
| 9           | -0.40317623          | -0.26621802           | -0.27799463 | -0.40193787 | -0.37733157 |
| 0.46405058  | 0.06422868           | -0.14552539           |             |             |             |
| 10          | 0.00677148           | -0.00985647           | 0.00344130  | -0.00195775 | -0.00086292 |
| 0.05199990  | 0.02270022           | 0.78853381            |             |             |             |
|             | 9                    | 10                    |             |             |             |
|             | 2277.7967            | 2328.1213             |             |             |             |
|             | -----                | -----                 |             |             |             |
| 1           | 0.00020908           | -0.00269763           |             |             |             |
| 2           | -0.00141275          | 0.00271248            |             |             |             |
| 3           | 0.00407547           | -0.00078336           |             |             |             |
| 4           | 0.00053003           | -0.00373547           |             |             |             |
| 5           | -0.00731820          | 0.77591221            |             |             |             |
| 6           | -0.69145505          | 0.17187320            |             |             |             |
| 7           | -0.31390244          | -0.46846142           |             |             |             |
| 8           | 0.16253579           | 0.16200861            |             |             |             |

Supplementary Material (ESI) for Dalton Transactions  
 This journal is © The Royal Society of Chemistry 2002

9 -0.14851170 0.35023007  
 10 -0.61221653 -0.00516209

Intensities  
 =====

| Intensity (degeneracy not counted) | Frequency<br>cm-1 | Dipole Strength<br>1e-40 esu2 cm2 | Absorption<br>km/mole |
|------------------------------------|-------------------|-----------------------------------|-----------------------|
| -----                              | -----             | -----                             | -----                 |
|                                    | 123.762522        | 0.000017                          | 0.000001              |
|                                    | 186.336285        | 6.985001                          | 0.326244              |
|                                    | 233.312278        | 17.977694                         | 1.051356              |
|                                    | 395.351554        | 15.067152                         | 1.493113              |
|                                    | 495.447672        | 3.474019                          | 0.431428              |
|                                    | 557.351795        | 0.331441                          | 0.046304              |
|                                    | 956.000229        | 673.020616                        | 161.274028            |
|                                    | 1014.828111       | 12.214338                         | 3.106995              |
|                                    | 2277.796698       | 0.219555                          | 0.125353              |
|                                    | 2328.121270       | 0.864679                          | 0.504590              |

Zero-Point Energy : 0.050564 a.u.  
 ===== 1.375923 eV

=====

Vibrations and Normal Modes \*\*\* (cartesian coordinates, NOT  
 mass-weighted) \*\*\*

=====

The headers on the normal mode eigenvectors below give the Frequency in cm-1  
 (a negative value means an imaginary frequency, no output for  
 (almost-)zero frequencies)

|                     | 123.763              | 182.658             |
|---------------------|----------------------|---------------------|
| -----               | -----                | -----               |
| 186.336             |                      |                     |
| 1.Re                | 0.000 0.000 -0.001   | 0.029 0.019 0.000   |
| 0.000 0.000 0.038   |                      |                     |
| 2.O                 | -0.033 -0.017 0.020  | 0.059 -0.061 0.003  |
| 0.203 -0.153 -0.032 |                      |                     |
| 3.O                 | 0.033 0.017 0.020    | 0.059 -0.061 -0.003 |
| -0.203 0.153 -0.032 |                      |                     |
| 4.C                 | 0.000 0.000 -0.039   | -0.225 0.142 0.000  |
| 0.000 0.000 -0.018  |                      |                     |
| 5.H                 | -0.015 -0.020 -0.054 | -0.378 0.193 0.001  |
| 0.192 -0.145 -0.068 |                      |                     |
| 6.H                 | 0.015 0.020 -0.054   | -0.378 0.193 -0.001 |
| -0.192 0.145 -0.068 |                      |                     |
| 7.C                 | 0.000 0.000 0.000    | -0.146 -0.194 0.000 |
| 0.000 0.000 -0.272  |                      |                     |
| 8.H                 | 0.000 0.000 -0.535   | -0.439 -0.099 0.000 |
| 0.000 0.000 -0.495  |                      |                     |
| 9.H                 | -0.355 -0.352 0.318  | -0.111 -0.365 0.010 |
| 0.185 -0.227 -0.355 |                      |                     |



Supplementary Material (ESI) for Dalton Transactions  
 This journal is © The Royal Society of Chemistry 2002

|        |       |        |       |        |        |        |
|--------|-------|--------|-------|--------|--------|--------|
| 10.H   | 0.355 | 0.352  | 0.318 | -0.111 | -0.365 | -0.010 |
| -0.185 | 0.227 | -0.355 |       |        |        |        |

|         |        |         |        |        |         |        |
|---------|--------|---------|--------|--------|---------|--------|
| 281.650 |        | 210.514 |        |        | 233.312 |        |
| -----   |        |         |        |        |         |        |
| 1.Re    | -0.049 | 0.071   | 0.000  | 0.000  | 0.000   | -0.032 |
| -0.070  | -0.043 | 0.000   |        |        |         |        |
| 2.O     | 0.205  | -0.405  | -0.040 | -0.079 | -0.209  | 0.041  |
| 0.487   | 0.272  | -0.382  |        |        |         |        |
| 3.O     | 0.205  | -0.405  | 0.040  | 0.079  | 0.209   | 0.041  |
| 0.487   | 0.272  | 0.382   |        |        |         |        |
| 4.C     | 0.239  | -0.046  | 0.000  | 0.000  | 0.000   | 0.222  |
| -0.125  | -0.064 | 0.000   |        |        |         |        |
| 5.H     | 0.454  | -0.097  | 0.008  | 0.195  | 0.377   | 0.493  |
| -0.046  | -0.133 | -0.019  |        |        |         |        |
| 6.H     | 0.454  | -0.097  | -0.008 | -0.195 | -0.377  | 0.493  |
| -0.046  | -0.133 | 0.019   |        |        |         |        |
| 7.C     | -0.102 | 0.032   | 0.000  | 0.000  | 0.000   | 0.000  |
| -0.040  | 0.038  | 0.000   |        |        |         |        |
| 8.H     | -0.213 | 0.072   | 0.000  | 0.000  | 0.000   | -0.014 |
| -0.049  | 0.038  | 0.000   |        |        |         |        |
| 9.H     | -0.113 | 0.002   | 0.009  | -0.003 | -0.003  | 0.001  |
| -0.064  | 0.040  | 0.011   |        |        |         |        |
| 10.H    | -0.113 | 0.002   | -0.009 | 0.003  | 0.003   | 0.001  |
| -0.064  | 0.040  | -0.011  |        |        |         |        |

|         |        |         |        |        |         |        |
|---------|--------|---------|--------|--------|---------|--------|
| 495.448 |        | 395.352 |        |        | 490.863 |        |
| -----   |        |         |        |        |         |        |
| 1.Re    | 0.000  | 0.000   | 0.006  | -0.036 | 0.028   | 0.000  |
| 0.000   | 0.000  | 0.013   |        |        |         |        |
| 2.O     | 0.064  | -0.015  | -0.003 | 0.012  | -0.010  | -0.011 |
| 0.011   | 0.066  | 0.012   |        |        |         |        |
| 3.O     | -0.064 | 0.015   | -0.003 | 0.012  | -0.010  | 0.011  |
| -0.011  | -0.066 | 0.012   |        |        |         |        |
| 4.C     | 0.000  | 0.000   | -0.095 | -0.020 | 0.018   | 0.000  |
| 0.000   | 0.000  | -0.269  |        |        |         |        |
| 5.H     | -0.544 | 0.434   | 0.064  | 0.033  | 0.002   | 0.000  |
| 0.507   | 0.438  | 0.097   |        |        |         |        |
| 6.H     | 0.544  | -0.434  | 0.064  | 0.033  | 0.002   | 0.000  |
| -0.507  | -0.438 | 0.097   |        |        |         |        |
| 7.C     | 0.000  | 0.000   | -0.006 | 0.339  | -0.265  | 0.000  |
| 0.000   | 0.000  | 0.007   |        |        |         |        |
| 8.H     | 0.000  | 0.000   | -0.035 | 0.420  | -0.294  | 0.000  |
| 0.000   | 0.000  | -0.002  |        |        |         |        |
| 9.H     | 0.028  | -0.039  | -0.016 | 0.401  | -0.335  | -0.018 |
| 0.015   | -0.015 | 0.000   |        |        |         |        |
| 10.H    | -0.028 | 0.039   | -0.016 | 0.401  | -0.335  | 0.018  |
| -0.015  | 0.015  | 0.000   |        |        |         |        |

|         |       |         |        |       |         |       |
|---------|-------|---------|--------|-------|---------|-------|
| 647.173 |       | 557.352 |        |       | 572.630 |       |
| -----   |       |         |        |       |         |       |
| 1.Re    | 0.000 | 0.000   | -0.008 | 0.001 | -0.005  | 0.000 |

Supplementary Material (ESI) for Dalton Transactions  
 This journal is © The Royal Society of Chemistry 2002

|        |        |        |        |        |        |        |        |
|--------|--------|--------|--------|--------|--------|--------|--------|
| 0.010  | -0.003 | 0.000  |        |        |        |        |        |
|        | 2.O    | -0.037 | 0.012  | -0.013 | -0.021 | 0.009  | 0.000  |
| -0.005 | 0.002  | 0.009  |        |        |        |        |        |
|        | 3.O    | 0.037  | -0.012 | -0.013 | -0.021 | 0.009  | 0.000  |
| -0.005 | 0.002  | -0.009 |        |        |        |        |        |
|        | 4.C    | 0.000  | 0.000  | 0.004  | -0.110 | -0.007 | 0.000  |
| -0.270 | 0.158  | 0.000  |        |        |        |        |        |
|        | 5.H    | -0.004 | -0.022 | -0.012 | 0.235  | -0.171 | -0.026 |
| 0.577  | -0.145 | -0.018 |        |        |        |        |        |
|        | 6.H    | 0.004  | 0.022  | -0.012 | 0.235  | -0.171 | 0.026  |
| 0.577  | -0.145 | 0.018  |        |        |        |        |        |
|        | 7.C    | 0.000  | 0.000  | 0.215  | 0.105  | 0.158  | 0.000  |
| -0.072 | -0.079 | 0.000  |        |        |        |        |        |
|        | 8.H    | 0.000  | 0.000  | -0.181 | -0.578 | 0.380  | 0.000  |
| 0.272  | -0.197 | 0.000  |        |        |        |        |        |
|        | 9.H    | 0.524  | -0.424 | -0.059 | 0.206  | -0.328 | 0.032  |
| -0.120 | 0.143  | -0.014 |        |        |        |        |        |
|        | 10.H   | -0.524 | 0.424  | -0.059 | 0.206  | -0.328 | -0.032 |
| -0.120 | 0.143  | 0.014  |        |        |        |        |        |

694.038

933.412

956.000

|        |        |        |        |        |        |        |        |
|--------|--------|--------|--------|--------|--------|--------|--------|
|        | 1.Re   | -0.016 | -0.035 | 0.000  | 0.001  | -0.001 | 0.000  |
| 0.000  | 0.000  | 0.110  |        |        |        |        |        |
|        | 2.O    | 0.003  | 0.015  | -0.012 | 0.011  | -0.001 | 0.010  |
| -0.287 | -0.111 | -0.608 |        |        |        |        |        |
|        | 3.O    | 0.003  | 0.015  | 0.012  | 0.011  | -0.001 | -0.010 |
| 0.287  | 0.111  | -0.608 |        |        |        |        |        |
|        | 4.C    | 0.152  | 0.288  | 0.000  | 0.006  | 0.002  | 0.000  |
| 0.000  | 0.000  | -0.057 |        |        |        |        |        |
|        | 5.H    | 0.225  | 0.594  | 0.161  | -0.012 | -0.006 | -0.008 |
| -0.039 | 0.120  | -0.001 |        |        |        |        |        |
|        | 6.H    | 0.225  | 0.594  | -0.161 | -0.012 | -0.006 | 0.008  |
| 0.039  | -0.120 | -0.001 |        |        |        |        |        |
|        | 7.C    | 0.024  | 0.035  | 0.000  | -0.247 | 0.164  | 0.000  |
| 0.000  | 0.000  | -0.046 |        |        |        |        |        |
|        | 8.H    | -0.108 | 0.076  | 0.000  | 0.521  | -0.113 | 0.000  |
| 0.000  | 0.000  | 0.069  |        |        |        |        |        |
|        | 9.H    | 0.043  | -0.068 | 0.010  | 0.338  | -0.355 | -0.271 |
| -0.085 | 0.028  | 0.006  |        |        |        |        |        |
|        | 10.H   | 0.043  | -0.068 | -0.010 | 0.338  | -0.355 | 0.271  |
| 0.085  | -0.028 | 0.006  |        |        |        |        |        |

983.716

1014.828

1016.600

|        |        |        |        |        |        |       |        |
|--------|--------|--------|--------|--------|--------|-------|--------|
|        | 1.Re   | -0.053 | -0.021 | 0.000  | 0.000  | 0.000 | 0.001  |
| 0.003  | 0.001  | 0.000  |        |        |        |       |        |
|        | 2.O    | 0.318  | 0.125  | 0.573  | -0.002 | 0.000 | -0.005 |
| -0.015 | -0.006 | -0.024 |        |        |        |       |        |
|        | 3.O    | 0.318  | 0.125  | -0.573 | 0.002  | 0.000 | -0.005 |
| -0.015 | -0.006 | 0.024  |        |        |        |       |        |
|        | 4.C    | -0.005 | -0.015 | 0.000  | 0.000  | 0.000 | -0.003 |
| 0.011  | 0.015  | 0.000  |        |        |        |       |        |
|        | 5.H    | -0.003 | -0.057 | -0.011 | -0.004 | 0.004 | -0.001 |
| -0.016 | -0.021 | -0.027 |        |        |        |       |        |

Supplementary Material (ESI) for Dalton Transactions  
 This journal is © The Royal Society of Chemistry 2002

|        |        |        |        |        |        |        |
|--------|--------|--------|--------|--------|--------|--------|
| 6.H    | -0.003 | -0.057 | 0.011  | 0.004  | -0.004 | -0.001 |
| -0.016 | -0.021 | 0.027  |        |        |        |        |
| 7.C    | 0.039  | 0.038  | 0.000  | 0.000  | 0.000  | 0.128  |
| 0.054  | 0.111  | 0.000  |        |        |        |        |
| 8.H    | 0.013  | 0.047  | 0.000  | 0.000  | 0.000  | -0.743 |
| 0.385  | -0.012 | 0.000  |        |        |        |        |
| 9.H    | -0.149 | -0.072 | 0.141  | 0.080  | 0.457  | -0.030 |
| -0.383 | -0.342 | 0.390  |        |        |        |        |
| 10.H   | -0.149 | -0.072 | -0.141 | -0.080 | -0.457 | -0.030 |
| -0.383 | -0.342 | -0.390 |        |        |        |        |

|          |        |          |        |        |          |        |
|----------|--------|----------|--------|--------|----------|--------|
|          |        | 1030.660 |        |        | 2123.140 |        |
| 2197.482 |        |          |        |        |          |        |
|          |        | -----    |        |        | -----    |        |
| 1.Re     | -0.006 | -0.011   | 0.000  | 0.000  | 0.000    | 0.000  |
| 0.000    | -0.001 | 0.000    |        |        |          |        |
| 2.O      | -0.002 | -0.001   | -0.004 | -0.001 | 0.000    | -0.001 |
| -0.001   | -0.001 | -0.001   |        |        |          |        |
| 3.O      | -0.002 | -0.001   | 0.004  | -0.001 | 0.000    | 0.001  |
| -0.001   | -0.001 | 0.001    |        |        |          |        |
| 4.C      | 0.143  | 0.310    | 0.000  | -0.001 | 0.000    | 0.000  |
| 0.045    | 0.130  | 0.000    |        |        |          |        |
| 5.H      | -0.161 | -0.405   | -0.498 | 0.002  | 0.002    | -0.004 |
| -0.112   | -0.346 | 0.599    |        |        |          |        |
| 6.H      | -0.161 | -0.405   | 0.498  | 0.002  | 0.002    | 0.004  |
| -0.112   | -0.346 | -0.599   |        |        |          |        |
| 7.C      | 0.003  | -0.010   | 0.000  | 0.060  | -0.071   | 0.000  |
| 0.001    | 0.000  | 0.000    |        |        |          |        |
| 8.H      | -0.046 | 0.008    | 0.000  | 0.221  | 0.619    | 0.000  |
| 0.001    | 0.001  | 0.000    |        |        |          |        |
| 9.H      | 0.030  | 0.029    | -0.026 | -0.285 | -0.101   | -0.434 |
| -0.002   | -0.001 | -0.004   |        |        |          |        |
| 10.H     | 0.030  | 0.029    | 0.026  | -0.285 | -0.101   | 0.434  |
| -0.002   | -0.001 | 0.004    |        |        |          |        |

|          |        |          |        |        |          |        |
|----------|--------|----------|--------|--------|----------|--------|
|          |        | 2262.275 |        |        | 2277.797 |        |
| 2328.121 |        |          |        |        |          |        |
|          |        | -----    |        |        | -----    |        |
| 1.Re     | 0.000  | 0.000    | 0.000  | 0.000  | 0.000    | 0.000  |
| 0.000    | 0.000  | 0.000    |        |        |          |        |
| 2.O      | 0.001  | 0.000    | 0.000  | 0.000  | 0.000    | 0.000  |
| 0.000    | 0.000  | -0.001   |        |        |          |        |
| 3.O      | 0.001  | 0.000    | 0.000  | 0.000  | 0.000    | 0.000  |
| 0.000    | 0.000  | -0.001   |        |        |          |        |
| 4.C      | -0.001 | 0.001    | 0.000  | 0.000  | 0.000    | -0.001 |
| 0.000    | 0.000  | -0.195   |        |        |          |        |
| 5.H      | 0.001  | -0.001   | 0.003  | 0.000  | -0.003   | 0.005  |
| -0.114   | -0.357 | 0.584    |        |        |          |        |
| 6.H      | 0.001  | -0.001   | -0.003 | 0.000  | 0.003    | 0.005  |
| 0.114    | 0.357  | 0.584    |        |        |          |        |
| 7.C      | -0.125 | -0.139   | 0.000  | 0.000  | 0.000    | -0.187 |
| 0.000    | 0.000  | 0.002    |        |        |          |        |
| 8.H      | 0.230  | 0.691    | 0.000  | 0.000  | 0.000    | -0.006 |
| 0.000    | 0.000  | 0.000    |        |        |          |        |
| 9.H      | 0.254  | 0.075    | 0.383  | 0.389  | 0.121    | 0.562  |
| -0.003   | -0.002 | -0.005   |        |        |          |        |
| 10.H     | 0.254  | 0.075    | -0.383 | -0.389 | -0.121   | 0.562  |

Supplementary Material (ESI) for Dalton Transactions  
This journal is © The Royal Society of Chemistry 2002

0.003 0.002 -0.005

List of All Frequencies:

Intensities

=====

| Intensity (degeneracy not counted) | Frequency<br>cm-1 | Dipole Strength<br>1e-40 esu2 cm2 | Absorption<br>km/mole |
|------------------------------------|-------------------|-----------------------------------|-----------------------|
|                                    | -----             | -----                             | -----                 |
|                                    | 123.762522        | 0.000017                          | 0.000001              |
|                                    | 182.657540        | 81.541441                         | 3.733310              |
|                                    | 186.336285        | 6.985001                          | 0.326244              |
|                                    | 210.513673        | 92.160118                         | 4.862968              |
|                                    | 233.312278        | 17.977694                         | 1.051356              |
|                                    | 281.650180        | 14.604869                         | 1.031064              |
|                                    | 395.351554        | 15.067152                         | 1.493113              |
|                                    | 490.863008        | 67.538693                         | 8.309809              |
|                                    | 495.447672        | 3.474019                          | 0.431428              |
|                                    | 557.351795        | 0.331441                          | 0.046304              |
|                                    | 572.629903        | 79.108350                         | 11.354667             |
|                                    | 647.173090        | 94.465219                         | 15.323941             |
|                                    | 694.038275        | 35.893367                         | 6.244184              |
|                                    | 933.411687        | 1.154451                          | 0.270101              |
|                                    | 956.000229        | 673.020616                        | 161.274028            |
|                                    | 983.716356        | 218.216902                        | 53.806699             |
|                                    | 1014.828111       | 12.214338                         | 3.106995              |
|                                    | 1016.600163       | 5.915107                          | 1.507269              |
|                                    | 1030.659726       | 45.444263                         | 11.740117             |
|                                    | 2123.140397       | 0.623551                          | 0.331840              |
|                                    | 2197.481944       | 12.495525                         | 6.882685              |
|                                    | 2262.274902       | 2.059579                          | 1.167890              |
|                                    | 2277.796698       | 0.219555                          | 0.125353              |
|                                    | 2328.121270       | 0.864679                          | 0.504590              |

=====  
Statistical Thermal Analysis \*\*\* ideal gas assumed \*\*\*  
=====

Pressure: 1.000000 atm.  
Temperature: 298.150000 K

Moments of Inertia (and direction vectors)

=====

|          |          |          |
|----------|----------|----------|
| 578.3654 | 636.5457 | 645.5008 |
| -----    | -----    | -----    |
| -0.6439  | 0.7651   | 0.0000   |
| 0.7651   | 0.6439   | 0.0000   |
| 0.0000   | 0.0000   | 1.0000   |

| Temp   |       |        |       |
|--------|-------|--------|-------|
| Transl | Rotat | Vibrat | Total |
| ----   | ----- | -----  | ----- |

|        |                       |        |        |
|--------|-----------------------|--------|--------|
| 298.15 | Entropy (cal/mole-K): |        |        |
| 42.484 | 26.966                | 17.664 | 87.115 |

|                              |       |        |        |
|------------------------------|-------|--------|--------|
| Internal Energy (Kcal/mole): |       |        |        |
| 0.889                        | 0.889 | 34.853 | 36.630 |

|                                             |       |        |        |
|---------------------------------------------|-------|--------|--------|
| Constant Volume Heat Capacity (cal/mole-K): |       |        |        |
| 2.981                                       | 2.981 | 21.342 | 27.304 |

\*\*\*\*\*
