# Supplementary material for: Vibrational properties and matrix photochemistry of trimethyldioxorhenium(vii), (CH3)3ReO2Electronic supplementary information (ESI) available: further details concerning the vibrational calculations and cartesion coordinates of the optimised geometries. See http://www.rsc.org/suppdata/dt/b2/b204238j/
Source: Royal Society of Chemistry journal article supplement (doi:10.1039/b204238j), 2002-08-07
Supplement: b204238j-3.pdf [file b204238j-3.pdf]

ReO2MeCH2

\*\*\*\*\*  
\* F R E Q U E N C I E S \*  
\*\*\*\*\*

Coordinates (Cartesian)

=====

| Atom      | bohr                |                       |           |           |  |
|-----------|---------------------|-----------------------|-----------|-----------|--|
| angstrom  | Geometric Variables |                       |           |           |  |
|           | X                   | Y                     | Z         | X         |  |
| Y         | Z                   | (0:frozen, *:LT par.) |           |           |  |
| 1 Re      | 1.689724            | 0.000000              | 0.000000  | 0.894163  |  |
| 0.000000  | 0.000000            | 1                     | 2         | 3         |  |
| 2 O       | 3.144271            | 0.569278              | 2.856530  | 1.663876  |  |
| 0.301249  | 1.511610            | 4                     | 5         | 6         |  |
| 3 O       | 3.144271            | 0.569278              | -2.856530 | 1.663876  |  |
| 0.301249  | -1.511610           | 7                     | 8         | 9         |  |
| 4 C       | 0.156052            | -3.229801             | 0.000000  | 0.082579  |  |
| -1.709136 | 0.000000            | 10                    | 11        | 12        |  |
| 5 H       | -0.180699           | -4.278201             | 1.751561  | -0.095622 |  |
| -2.263926 | 0.926886            | 13                    | 14        | 15        |  |
| 6 H       | -0.180699           | -4.278201             | -1.751561 | -0.095622 |  |
| -2.263926 | -0.926886           | 16                    | 17        | 18        |  |
| 7 C       | -1.535315           | 2.345550              | 0.000000  | -0.812454 |  |
| 1.241211  | 0.000000            | 19                    | 20        | 21        |  |
| 8 H       | -0.870744           | 4.315431              | 0.000000  | -0.460778 |  |
| 2.283627  | 0.000000            | 22                    | 23        | 24        |  |
| 9 H       | -2.683429           | 1.993333              | -1.688484 | -1.420009 |  |
| 1.054826  | -0.893507           | 25                    | 26        | 27        |  |
| 10 H      | -2.683429           | 1.993333              | 1.688484  | -1.420009 |  |
| 1.054826  | 0.893507            | 28                    | 29        | 30        |  |

Atomic Masses:

-----

|       |              |
|-------|--------------|
| 1. Re | 186.95575000 |
| 2. O  | 15.99491400  |
| 3. O  | 15.99491400  |
| 4. C  | 12.00000000  |
| 5. H  | 1.00782500   |
| 6. H  | 1.00782500   |
| 7. C  | 12.00000000  |
| 8. H  | 1.00782500   |
| 9. H  | 1.00782500   |
| 10. H | 1.00782500   |

=====

Normal Modes in Symmetry Displacements \*\*\* (cartesians, not  
mass-weighted) \*\*\*

=====

=== AA ===

Symmetry Displacements

|        |        |        | 1     |       |        | 2      |       |       |
|--------|--------|--------|-------|-------|--------|--------|-------|-------|
| 3      |        |        | ----- |       |        | -----  |       |       |
| 1.Re   | 0.036  | 0.000  | 0.000 | 0.000 | 0.000  | 0.036  | 0.000 | 0.000 |
| 0.000  | 0.000  | 0.000  |       |       |        |        |       |       |
| 2.O    | -0.110 | -0.002 | 0.000 | 0.000 | 0.002  | -0.120 | 0.000 | 0.000 |
| 0.000  | 0.000  | 0.177  |       |       |        |        |       |       |
| 3.O    | -0.110 | -0.002 | 0.000 | 0.000 | 0.002  | -0.120 | 0.000 | 0.000 |
| 0.000  | 0.000  | -0.177 |       |       |        |        |       |       |
| 4.C    | -0.116 | 0.002  | 0.000 | 0.000 | -0.018 | -0.104 | 0.000 | 0.000 |
| 0.000  | 0.000  | 0.000  |       |       |        |        |       |       |
| 5.H    | -0.118 | 0.003  | 0.000 | 0.000 | -0.024 | -0.102 | 0.000 | 0.000 |
| 0.000  | 0.000  | 0.000  |       |       |        |        |       |       |
| 6.H    | -0.118 | 0.003  | 0.000 | 0.000 | -0.024 | -0.102 | 0.000 | 0.000 |
| 0.000  | 0.000  | 0.000  |       |       |        |        |       |       |
| 7.C    | -0.108 | 0.005  | 0.000 | 0.000 | 0.012  | -0.095 | 0.000 | 0.000 |
| 0.000  | 0.000  | 0.000  |       |       |        |        |       |       |
| 8.H    | -0.105 | 0.004  | 0.000 | 0.000 | 0.023  | -0.099 | 0.000 | 0.000 |
| 0.000  | 0.000  | 0.000  |       |       |        |        |       |       |
| 9.H    | -0.108 | 0.007  | 0.000 | 0.000 | 0.010  | -0.089 | 0.000 | 0.000 |
| 0.000  | 0.000  | 0.000  |       |       |        |        |       |       |
| 10.H   | -0.108 | 0.007  | 0.000 | 0.000 | 0.010  | -0.089 | 0.000 | 0.000 |
| 0.000  | 0.000  | 0.000  |       |       |        |        |       |       |
| 6      |        |        | 4     |       |        | 5      |       |       |
| -----  |        |        | ----- |       |        | -----  |       |       |
| 1.Re   | 0.000  | 0.000  | 0.000 | 0.000 | 0.000  | 0.000  | 0.000 | 0.000 |
| 0.000  | 0.000  | 0.000  |       |       |        |        |       |       |
| 2.O    | 0.120  | 0.013  | 0.000 | 0.000 | 0.000  | 0.089  | 0.000 | 0.000 |
| 0.000  | 0.000  | 0.000  |       |       |        |        |       |       |
| 3.O    | 0.120  | 0.013  | 0.000 | 0.000 | 0.000  | 0.089  | 0.000 | 0.000 |
| 0.000  | 0.000  |        |       |       |        |        |       |       |
| 4.C    | -0.112 | -0.008 | 0.000 | 0.000 | -0.117 | -0.138 | 0.000 | 0.000 |
| 0.139  | -0.071 | 0.000  |       |       |        |        |       |       |
| 5.H    | -0.105 | -0.010 | 0.000 | 0.000 | -0.160 | -0.124 | 0.000 | 0.000 |
| -0.537 | -0.046 | 0.000  |       |       |        |        |       |       |
| 6.H    | -0.105 | -0.010 | 0.000 | 0.000 | -0.160 | -0.124 | 0.000 | 0.000 |
| -0.537 | -0.046 | 0.000  |       |       |        |        |       |       |
| 7.C    | -0.152 | -0.020 | 0.000 | 0.000 | 0.111  | -0.068 | 0.000 | 0.000 |
| -0.045 | 0.055  | 0.000  |       |       |        |        |       |       |
| 8.H    | -0.166 | -0.015 | 0.000 | 0.000 | 0.192  | -0.096 | 0.000 | 0.000 |
| 0.101  | 0.005  | 0.000  |       |       |        |        |       |       |
| 9.H    | -0.149 | -0.028 | 0.000 | 0.000 | 0.097  | -0.022 | 0.000 | 0.000 |
| -0.072 | 0.140  | 0.000  |       |       |        |        |       |       |
| 10.H   | -0.149 | -0.028 | 0.000 | 0.000 | 0.097  | -0.022 | 0.000 | 0.000 |
| -0.072 | 0.140  | 0.000  |       |       |        |        |       |       |



Supplementary Material (ESI) for Dalton Transactions  
 This journal is © The Royal Society of Chemistry 2002

|      |        |        |       |       |       |        |
|------|--------|--------|-------|-------|-------|--------|
| 6.H  | 0.000  | 0.000  | 0.000 | 0.000 | 0.000 | 0.000  |
| 7.C  | 0.000  | 0.000  | 0.000 | 0.000 | 0.000 | 0.000  |
| 8.H  | 0.500  | 0.641  | 0.000 | 0.000 | 0.000 | 0.000  |
| 9.H  | -0.250 | -0.321 | 0.000 | 0.000 | 0.000 | 0.704  |
| 10.H | -0.250 | -0.321 | 0.000 | 0.000 | 0.000 | -0.704 |

Largest computed component in inactive z Dipole derivative= 0.2711E-17  
 (symmetry index= 1)  
 Deviation may result from numerical integration and/or the non-linearity  
 in the transformations between Cartesian and Z-matrix coordinates.

Frequencies and Normal Modes

```

=====

```

| 6           | 1<br>7      | 2<br>8      | 3           | 4           | 5           |             |
|-------------|-------------|-------------|-------------|-------------|-------------|-------------|
|             | 205.8390    | 218.7122    | 282.0957    | 538.7463    | 743.4287    |             |
| 789.3156    | 810.9563    | 984.2535    |             |             |             |             |
|             | -----       | -----       | -----       | -----       | -----       |             |
| 1           | 0.17550018  | 0.55909538  | -0.49173770 | 0.44364824  | 0.11113097  |             |
| -0.18401644 | 0.16508549  | 0.37828438  |             |             |             |             |
| 2           | 0.51384948  | -0.47892752 | -0.30416703 | -0.34397362 | 0.15781113  |             |
| -0.48640732 | 0.10187696  | 0.14508998  |             |             |             |             |
| 3           | -0.02005458 | 0.07248060  | -0.53657015 | 0.02092274  | -0.01631867 |             |
| -0.02256131 | 0.03172063  | -0.83875931 |             |             |             |             |
| 4           | 0.59805935  | 0.13025328  | 0.55847577  | 0.37757957  | -0.00036933 |             |
| -0.18112636 | 0.14507696  | -0.34087286 |             |             |             |             |
| 5           | -0.29984238 | 0.49411343  | 0.24666324  | -0.46922842 | 0.20679236  |             |
| -0.56157898 | 0.10151788  | -0.10531636 |             |             |             |             |
| 6           | -0.15356275 | -0.09780251 | -0.00878185 | 0.28291022  | -0.42236423 |             |
| -0.53926677 | -0.58444257 | 0.00950828  |             |             |             |             |
| 7           | 0.35134272  | 0.32702185  | -0.04449386 | -0.41894898 | -0.35417413 |             |
| 0.21882290  | 0.00859676  | 0.04264837  |             |             |             |             |
| 8           | 0.12713326  | 0.07779244  | -0.00069270 | -0.05546036 | 0.22325845  |             |
| 0.08385155  | -0.34015503 | 0.00082626  |             |             |             |             |
| 9           | -0.09076590 | -0.08886336 | 0.03046942  | 0.12860148  | 0.47586973  |             |
| 0.01462339  | -0.02905133 | -0.04600875 |             |             |             |             |
| 10          | 0.00140211  | -0.00342244 | -0.00566855 | 0.00036226  | -0.03793237 |             |
| 0.03213712  | -0.03382471 | -0.00513804 |             |             |             |             |
| 11          | -0.28424672 | -0.23061926 | 0.03111061  | 0.17107458  | -0.25226832 |             |
| -0.18002893 | 0.68074661  | 0.01673114  |             |             |             |             |
| 12          | 0.06998842  | 0.08951816  | -0.03208742 | -0.13126526 | -0.51936859 |             |
| 0.01841989  | 0.06705600  | 0.02157074  |             |             |             |             |
| 13          | 0.00133327  | 0.00241593  | 0.00168060  | -0.00172037 | 0.05375267  |             |
| 0.02633629  | -0.03741733 | -0.01568204 |             |             |             |             |
| 14          | 0.00727394  | -0.00026398 | 0.00358697  | -0.00285929 | 0.04333122  |             |
| 0.02111904  | -0.03681571 | -0.00157107 |             |             |             |             |
|             | 9           | 10          | 11          | 12          | 13          | 14          |
|             | 1201.5258   | 1310.3580   | 1399.9950   | 2954.7374   | 3021.8923   | 3046.5665   |
|             | -----       | -----       | -----       | -----       | -----       | -----       |
| 1           | -0.00129951 | -0.03298643 | -0.01796951 | 0.00153166  | 0.00157391  | -0.00060318 |
| 2           | -0.01863730 | -0.04647530 | -0.01721422 | -0.00219208 | 0.00351418  | -0.00211558 |
| 3           | 0.02391320  | 0.00758131  | 0.00801601  | -0.00096114 | 0.00235929  | 0.00057695  |
| 4           | -0.00185238 | -0.02821093 | -0.00541097 | -0.00045246 | 0.00419544  | 0.00163488  |
| 5           | 0.00485782  | -0.07190081 | -0.01197868 | -0.00136929 | 0.00726759  | -0.00233375 |
| 6           | -0.01924034 | 0.24007781  | -0.02743689 | -0.00242375 | -0.13078639 | -0.00168515 |

Supplementary Material (ESI) for Dalton Transactions  
 This journal is © The Royal Society of Chemistry 2002

|    |             |             |             |             |             |             |
|----|-------------|-------------|-------------|-------------|-------------|-------------|
| 7  | -0.01577250 | 0.55439784  | -0.01955442 | -0.00079265 | -0.33001909 | -0.00037195 |
| 8  | 0.72101634  | -0.02636888 | -0.24715652 | 0.15541811  | 0.02619116  | -0.44231279 |
| 9  | -0.43065452 | 0.34133335  | -0.37720112 | -0.25766838 | -0.24233987 | -0.40914231 |
| 10 | 0.00654881  | -0.53609198 | -0.00167431 | -0.00021355 | -0.84192111 | 0.00635513  |
| 11 | 0.35410187  | 0.24501843  | -0.16729032 | 0.09462525  | -0.17671242 | -0.14983043 |
| 12 | -0.23383147 | -0.40133915 | -0.44850984 | -0.18109647 | 0.27275135  | -0.41192541 |
| 13 | -0.20120856 | -0.00016160 | -0.54225745 | 0.75430744  | 0.00186780  | 0.30207022  |
| 14 | 0.26928089  | 0.00538580  | -0.52100718 | -0.54653997 | 0.00465839  | 0.59458152  |

Intensities

=====

| Intensity (degeneracy not counted) | Frequency<br>cm-1 | Dipole Strength<br>1e-40 esu <sup>2</sup> cm <sup>2</sup> | Absorption<br>km/mole |
|------------------------------------|-------------------|-----------------------------------------------------------|-----------------------|
|                                    | 205.839022        | 71.643911                                                 | 3.696452              |
|                                    | 218.712186        | 109.237122                                                | 5.988545              |
|                                    | 282.095695        | 14.831052                                                 | 1.048688              |
|                                    | 538.746300        | 73.638390                                                 | 9.944127              |
|                                    | 743.428746        | 108.637714                                                | 20.244080             |
|                                    | 789.315602        | 91.564895                                                 | 18.115810             |
|                                    | 810.956305        | 98.712063                                                 | 20.065305             |
|                                    | 984.253476        | 198.233968                                                | 48.906108             |
|                                    | 1201.525793       | 8.333866                                                  | 2.509907              |
|                                    | 1310.358036       | 29.545330                                                 | 9.704136              |
|                                    | 1399.995044       | 21.050517                                                 | 7.386987              |
|                                    | 2954.737443       | 1.441253                                                  | 1.067425              |
|                                    | 3021.892306       | 9.211235                                                  | 6.977099              |
|                                    | 3046.566536       | 2.126552                                                  | 1.623921              |

=== AAA ===

Symmetry Displacements

|        | 1      |        |        | 2      |        |        |        |
|--------|--------|--------|--------|--------|--------|--------|--------|
| 3      |        |        |        |        |        |        |        |
|        | -----  |        |        | -----  |        |        |        |
|        | 1.Re   | 0.000  | 0.000  | 0.036  | 0.000  | 0.000  | 0.000  |
| 0.000  | 0.000  | 0.000  |        |        |        |        |        |
|        | 2.O    | 0.015  | -0.004 | -0.120 | 0.114  | 0.030  | 0.088  |
| 0.055  | -0.070 | 0.000  |        |        |        |        |        |
|        | 3.O    | -0.015 | 0.004  | -0.120 | -0.114 | -0.030 | 0.088  |
| -0.055 | 0.070  | 0.000  |        |        |        |        |        |
|        | 4.C    | 0.000  | 0.000  | -0.109 | 0.000  | 0.000  | -0.106 |
| 0.000  | 0.000  | 0.103  |        |        |        |        |        |
|        | 5.H    | 0.009  | -0.002 | -0.109 | 0.070  | 0.018  | -0.081 |
| -0.316 | -0.043 | 0.016  |        |        |        |        |        |
|        | 6.H    | -0.009 | 0.002  | -0.109 | -0.070 | -0.018 | -0.081 |
| 0.316  | 0.043  | 0.016  |        |        |        |        |        |
|        | 7.C    | 0.000  | 0.000  | -0.092 | 0.000  | 0.000  | -0.097 |
| 0.000  | 0.000  | -0.066 |        |        |        |        |        |
|        | 8.H    | 0.000  | 0.000  | -0.093 | 0.000  | 0.000  | -0.144 |
| 0.000  | 0.000  | 0.102  |        |        |        |        |        |
|        | 9.H    | -0.009 | 0.002  | -0.087 | -0.067 | -0.018 | -0.047 |
| 0.305  | 0.041  | -0.282 |        |        |        |        |        |
|        | 10.H   | 0.009  | -0.002 | -0.087 | 0.067  | 0.018  | -0.047 |

-0.305 -0.041 -0.282

| 6      | 4      |        |        | 5      |        |        |
|--------|--------|--------|--------|--------|--------|--------|
| 1.Re   | 0.000  | 0.000  | 0.000  | 0.000  | 0.000  | 0.000  |
| 0.000  | 0.000  | 0.000  |        |        |        |        |
| 2.O    | 0.000  | 0.101  | 0.000  | 0.000  | 0.000  | 0.000  |
| 0.000  | 0.000  | 0.000  |        |        |        |        |
| 3.O    | 0.000  | -0.101 | 0.000  | 0.000  | 0.000  | 0.000  |
| 0.000  | 0.000  | 0.000  |        |        |        |        |
| 4.C    | 0.000  | 0.000  | -0.075 | 0.000  | 0.000  | 0.126  |
| 0.000  | 0.000  | 0.000  |        |        |        |        |
| 5.H    | -0.241 | -0.127 | -0.198 | 0.140  | -0.113 | -0.573 |
| 0.038  | 0.099  | -0.116 |        |        |        |        |
| 6.H    | 0.241  | 0.127  | -0.198 | -0.140 | 0.113  | -0.573 |
| -0.038 | -0.099 | -0.116 |        |        |        |        |
| 7.C    | 0.000  | 0.000  | 0.096  | 0.000  | 0.000  | -0.038 |
| 0.000  | 0.000  | 0.139  |        |        |        |        |
| 8.H    | 0.000  | 0.000  | 0.330  | 0.000  | 0.000  | 0.035  |
| 0.000  | 0.000  | -0.587 |        |        |        |        |
| 9.H    | 0.233  | 0.122  | -0.088 | -0.135 | 0.109  | 0.031  |
| -0.036 | -0.096 | -0.417 |        |        |        |        |
| 10.H   | -0.233 | -0.122 | -0.088 | 0.135  | -0.109 | 0.031  |
| 0.036  | 0.096  | -0.417 |        |        |        |        |

| 9      | 7      |        |        | 8      |        |        |
|--------|--------|--------|--------|--------|--------|--------|
| 1.Re   | 0.000  | 0.000  | 0.000  | 0.000  | 0.000  | 0.000  |
| 0.000  | 0.000  | 0.000  |        |        |        |        |
| 2.O    | 0.000  | 0.000  | 0.000  | 0.000  | 0.000  | 0.000  |
| 0.000  | 0.000  | 0.000  |        |        |        |        |
| 3.O    | 0.000  | 0.000  | 0.000  | 0.000  | 0.000  | 0.000  |
| 0.000  | 0.000  | 0.000  |        |        |        |        |
| 4.C    | 0.000  | 0.000  | 0.000  | 0.000  | 0.000  | 0.000  |
| 0.000  | 0.000  | 0.000  |        |        |        |        |
| 5.H    | 0.187  | -0.398 | 0.227  | 0.521  | 0.079  | 0.000  |
| 0.000  | 0.534  | 0.000  |        |        |        |        |
| 6.H    | -0.187 | 0.398  | 0.227  | -0.521 | -0.079 | 0.000  |
| 0.000  | -0.534 | 0.000  |        |        |        |        |
| 7.C    | 0.000  | 0.000  | 0.000  | 0.000  | 0.000  | 0.000  |
| 0.000  | 0.000  | 0.000  |        |        |        |        |
| 8.H    | 0.000  | 0.000  | 0.071  | 0.000  | 0.000  | 0.229  |
| 0.000  | 0.000  | 0.252  |        |        |        |        |
| 9.H    | -0.181 | 0.383  | -0.263 | 0.417  | -0.076 | -0.114 |
| -0.135 | 0.381  | -0.126 |        |        |        |        |
| 10.H   | 0.181  | -0.383 | -0.263 | -0.417 | 0.076  | -0.114 |
| 0.135  | -0.381 | -0.126 |        |        |        |        |

|      | 10    |       |       |
|------|-------|-------|-------|
| 1.Re | 0.000 | 0.000 | 0.000 |
| 2.O  | 0.000 | 0.000 | 0.000 |
| 3.O  | 0.000 | 0.000 | 0.000 |

Supplementary Material (ESI) for Dalton Transactions  
This journal is © The Royal Society of Chemistry 2002

|      |        |        |        |
|------|--------|--------|--------|
| 4.C  | 0.000  | 0.000  | 0.000  |
| 5.H  | 0.000  | 0.000  | 0.000  |
| 6.H  | 0.000  | 0.000  | 0.000  |
| 7.C  | 0.000  | 0.000  | 0.000  |
| 8.H  | 0.000  | 0.000  | 0.573  |
| 9.H  | -0.308 | -0.394 | -0.287 |
| 10.H | 0.308  | 0.394  | -0.287 |

Largest computed component in inactive x Dipole derivative= 0.6288E-17  
(symmetry index= 2)  
Deviation may result from numerical integration and/or the non-linearity  
in the transformations between Cartesian and Z-matrix coordinates.

Largest computed component in inactive y Dipole derivative= 0.3469E-17  
(symmetry index= 2)  
Deviation may result from numerical integration and/or the non-linearity  
in the transformations between Cartesian and Z-matrix coordinates.

Frequencies and Normal Modes

```
=====
```

|             | 1           | 2           | 3           | 4           | 5           |
|-------------|-------------|-------------|-------------|-------------|-------------|
| 6           | 7           | 8           |             |             |             |
|             | 172.1320    | 204.5599    | 262.2228    | 535.6349    | 634.6296    |
| 728.3741    | 959.4060    | 1395.0022   |             |             |             |
| -----       |             |             |             |             |             |
| 1           | -0.07415808 | 0.45478845  | 0.47511252  | -0.06542389 | 0.11689448  |
| 0.04750310  | -0.73577914 | -0.01901026 |             |             |             |
| 2           | 0.03663585  | 0.47833210  | 0.43853421  | -0.18852097 | 0.24172161  |
| 0.25455360  | 0.64702866  | -0.01091360 |             |             |             |
| 3           | -0.56216522 | 0.46642554  | -0.26159394 | -0.19152404 | -0.56579169 |
| -0.17917567 | 0.09087709  | 0.02808816  |             |             |             |
| 4           | -0.42826488 | -0.52246640 | 0.66154702  | -0.06466102 | -0.20019165 |
| -0.22330809 | 0.10633403  | 0.02275063  |             |             |             |
| 5           | 0.01636210  | 0.05640070  | 0.11170708  | 0.52700186  | -0.28708541 |
| 0.27175651  | 0.03180666  | -0.02487826 |             |             |             |
| 6           | 0.13858031  | 0.08931115  | 0.02335371  | -0.04319765 | 0.07483598  |
| -0.49845496 | 0.05451677  | -0.51018874 |             |             |             |
| 7           | -0.35381159 | -0.00862292 | -0.02729816 | 0.50271285  | 0.04386804  |
| 0.40942607  | 0.00980700  | -0.31890408 |             |             |             |
| 8           | -0.45342998 | 0.10507489  | -0.13568829 | 0.34166300  | 0.62794388  |
| -0.39140332 | 0.06191957  | 0.19569852  |             |             |             |
| 9           | -0.37870126 | -0.22704383 | -0.20902593 | -0.51985761 | 0.28886979  |
| 0.45058648  | -0.11074242 | -0.17490062 |             |             |             |
| 10          | 0.00704201  | -0.00452033 | 0.00278784  | -0.00378289 | -0.00269581 |
| 0.06936938  | -0.01547752 | 0.75280379  |             |             |             |
| -----       |             |             |             |             |             |
|             | 9           | 10          |             |             |             |
|             | 3066.9590   | 3121.7456   |             |             |             |
| -----       |             |             |             |             |             |
| 1           | -0.00145106 | 0.00073275  |             |             |             |
| 2           | -0.00182582 | 0.00289897  |             |             |             |
| 3           | 0.00422691  | -0.00387522 |             |             |             |
| 4           | 0.00300797  | -0.00397202 |             |             |             |
| 5           | -0.00316156 | 0.74056168  |             |             |             |
| 6           | -0.64047644 | 0.20706307  |             |             |             |
| 7           | -0.33002060 | -0.49093167 |             |             |             |

Supplementary Material (ESI) for Dalton Transactions  
 This journal is © The Royal Society of Chemistry 2002

8 0.17121704 0.17105057  
 9 -0.15291847 0.37199540  
 10 -0.65431999 -0.00087979

Intensities  
 =====

| Intensity (degeneracy not counted) | Frequency<br>cm-1 | Dipole Strength<br>1e-40 esu2 cm2 | Absorption<br>km/mole |
|------------------------------------|-------------------|-----------------------------------|-----------------------|
|                                    | 172.132019        | 1.394816                          | 0.060181              |
|                                    | 204.559886        | 8.762388                          | 0.449284              |
|                                    | 262.222809        | 30.070662                         | 1.976476              |
|                                    | 535.634914        | 20.090171                         | 2.697308              |
|                                    | 634.629575        | 0.019426                          | 0.003090              |
|                                    | 728.374146        | 0.548261                          | 0.100097              |
|                                    | 959.406010        | 668.127875                        | 160.671962            |
|                                    | 1395.002173       | 21.763516                         | 7.609954              |
|                                    | 3066.958978       | 0.513706                          | 0.394913              |
|                                    | 3121.745608       | 1.831005                          | 1.432733              |

Zero-Point Energy : 0.065131 a.u.  
 =====  
 1.772298 eV

=====  
 Vibrations and Normal Modes \*\*\* (cartesian coordinates, NOT  
 mass-weighted) \*\*\*  
 =====

The headers on the normal mode eigenvectors below give the Frequency in cm-1  
 (a negative value means an imaginary frequency, no output for  
 (almost-)zero frequencies)

|               | 172.132              | 204.560            |
|---------------|----------------------|--------------------|
| 205.839       | -----                | -----              |
| 1.Re          | 0.000 0.000 0.003    | 0.000 0.000 -0.031 |
| -0.012 -0.036 | 0.000                |                    |
| 2.O           | 0.028 0.003 -0.012   | -0.164 0.138 0.023 |
| -0.104 0.156  | 0.007                |                    |
| 3.O           | -0.028 -0.003 -0.012 | 0.164 -0.138 0.023 |
| -0.104 0.156  | -0.007               |                    |
| 4.C           | 0.000 0.000 0.020    | 0.000 0.000 0.011  |
| 0.160 -0.125  | 0.000                |                    |
| 5.H           | 0.012 0.006 0.026    | -0.152 0.100 0.042 |
| 0.247 -0.157  | -0.002               |                    |
| 6.H           | -0.012 -0.006 0.026  | 0.152 -0.100 0.042 |
| 0.247 -0.157  | 0.002                |                    |
| 7.C           | 0.000 0.000 -0.019   | 0.000 0.000 0.301  |
| 0.196 0.214   | 0.000                |                    |
| 8.H           | 0.000 0.000 0.509    | 0.000 0.000 0.611  |
| 0.514 0.109   | 0.000                |                    |
| 9.H           | 0.364 0.344 -0.342   | -0.097 0.285 0.309 |



Supplementary Material (ESI) for Dalton Transactions  
 This journal is © The Royal Society of Chemistry 2002

|       |       |        |        |        |       |        |       |
|-------|-------|--------|--------|--------|-------|--------|-------|
| 0.160 | 0.390 | -0.010 |        |        |       |        |       |
|       | 10.H  | -0.364 | -0.344 | -0.342 | 0.097 | -0.285 | 0.309 |
| 0.160 | 0.390 | 0.010  |        |        |       |        |       |

|         |        |        |         |        |         |        |  |
|---------|--------|--------|---------|--------|---------|--------|--|
|         |        |        | 218.712 |        | 262.223 |        |  |
| 282.096 |        |        |         |        |         |        |  |
| -----   |        |        |         |        |         |        |  |
| 1.Re    | 0.046  | -0.039 | 0.000   | 0.000  | 0.000   | 0.030  |  |
| 0.072   | 0.044  | 0.000  |         |        |         |        |  |
| 2.O     | -0.107 | 0.232  | 0.029   | 0.076  | 0.172   | -0.032 |  |
| -0.489  | -0.272 | 0.384  |         |        |         |        |  |
| 3.O     | -0.107 | 0.232  | -0.029  | -0.076 | -0.172  | -0.032 |  |
| -0.489  | -0.272 | -0.384 |         |        |         |        |  |
| 4.C     | -0.323 | 0.125  | 0.000   | 0.000  | 0.000   | -0.287 |  |
| 0.122   | 0.065  | 0.000  |         |        |         |        |  |
| 5.H     | -0.535 | 0.180  | -0.005  | -0.180 | -0.335  | -0.526 |  |
| 0.038   | 0.129  | 0.016  |         |        |         |        |  |
| 6.H     | -0.535 | 0.180  | 0.005   | 0.180  | 0.335   | -0.526 |  |
| 0.038   | 0.129  | -0.016 |         |        |         |        |  |
| 7.C     | -0.013 | -0.121 | 0.000   | 0.000  | 0.000   | -0.012 |  |
| 0.037   | -0.037 | 0.000  |         |        |         |        |  |
| 8.H     | -0.099 | -0.096 | 0.000   | 0.000  | 0.000   | -0.017 |  |
| 0.041   | -0.035 | 0.000  |         |        |         |        |  |
| 9.H     | 0.013  | -0.191 | 0.000   | 0.000  | -0.013  | -0.008 |  |
| 0.059   | -0.038 | -0.010 |         |        |         |        |  |
| 10.H    | 0.013  | -0.191 | 0.000   | 0.000  | 0.013   | -0.008 |  |
| 0.059   | -0.038 | 0.010  |         |        |         |        |  |

|         |        |        |         |        |         |        |  |
|---------|--------|--------|---------|--------|---------|--------|--|
|         |        |        | 535.635 |        | 538.746 |        |  |
| 634.630 |        |        |         |        |         |        |  |
| -----   |        |        |         |        |         |        |  |
| 1.Re    | 0.000  | 0.000  | -0.002  | 0.033  | -0.025  | 0.000  |  |
| 0.000   | 0.000  | -0.005 |         |        |         |        |  |
| 2.O     | -0.035 | 0.002  | -0.009  | -0.009 | 0.007   | 0.008  |  |
| 0.002   | -0.029 | -0.008 |         |        |         |        |  |
| 3.O     | 0.035  | -0.002 | -0.009  | -0.009 | 0.007   | -0.008 |  |
| -0.002  | 0.029  | -0.008 |         |        |         |        |  |
| 4.C     | 0.000  | 0.000  | 0.084   | 0.013  | -0.012  | 0.000  |  |
| 0.000   | 0.000  | 0.130  |         |        |         |        |  |
| 5.H     | 0.432  | -0.532 | -0.160  | -0.020 | -0.003  | 0.001  |  |
| -0.601  | -0.310 | -0.181 |         |        |         |        |  |
| 6.H     | -0.432 | 0.532  | -0.160  | -0.020 | -0.003  | -0.001 |  |
| 0.601   | 0.310  | -0.181 |         |        |         |        |  |
| 7.C     | 0.000  | 0.000  | 0.005   | -0.395 | 0.312   | 0.000  |  |
| 0.000   | 0.000  | -0.006 |         |        |         |        |  |
| 8.H     | 0.000  | 0.000  | 0.018   | -0.408 | 0.310   | 0.000  |  |
| 0.000   | 0.000  | 0.006  |         |        |         |        |  |
| 9.H     | -0.007 | 0.020  | 0.004   | -0.388 | 0.300   | -0.004 |  |
| -0.017  | 0.011  | 0.004  |         |        |         |        |  |
| 10.H    | 0.007  | -0.020 | 0.004   | -0.388 | 0.300   | 0.004  |  |
| 0.017   | -0.011 | 0.004  |         |        |         |        |  |

|         |  |  |         |  |         |  |  |
|---------|--|--|---------|--|---------|--|--|
|         |  |  | 728.374 |  | 743.429 |  |  |
| 789.316 |  |  |         |  |         |  |  |
| -----   |  |  |         |  |         |  |  |

Supplementary Material (ESI) for Dalton Transactions  
 This journal is © The Royal Society of Chemistry 2002

|        |        |        |        |        |        |        |
|--------|--------|--------|--------|--------|--------|--------|
| 1.Re   | 0.000  | 0.000  | 0.002  | 0.005  | 0.007  | 0.000  |
| 0.010  | 0.027  | 0.000  |        |        |        |        |
| 2.O    | 0.022  | -0.003 | 0.019  | -0.014 | -0.001 | -0.003 |
| 0.004  | -0.010 | 0.006  |        |        |        |        |
| 3.O    | -0.022 | 0.003  | 0.019  | -0.014 | -0.001 | 0.003  |
| 0.004  | -0.010 | -0.006 |        |        |        |        |
| 4.C    | 0.000  | 0.000  | 0.001  | -0.117 | -0.102 | 0.000  |
| -0.064 | -0.332 | 0.000  |        |        |        |        |
| 5.H    | 0.023  | 0.008  | 0.012  | 0.246  | -0.287 | -0.032 |
| -0.520 | -0.267 | -0.036 |        |        |        |        |
| 6.H    | -0.023 | -0.008 | 0.012  | 0.246  | -0.287 | 0.032  |
| -0.520 | -0.267 | 0.036  |        |        |        |        |
| 7.C    | 0.000  | 0.000  | -0.130 | 0.062  | 0.085  | 0.000  |
| -0.034 | -0.046 | 0.000  |        |        |        |        |
| 8.H    | 0.000  | 0.000  | 0.289  | -0.549 | 0.278  | 0.000  |
| 0.286  | -0.143 | 0.000  |        |        |        |        |
| 9.H    | -0.511 | 0.408  | 0.145  | 0.138  | -0.358 | 0.036  |
| -0.074 | 0.202  | -0.023 |        |        |        |        |
| 10.H   | 0.511  | -0.408 | 0.145  | 0.138  | -0.358 | -0.036 |
| -0.074 | 0.202  | 0.023  |        |        |        |        |

|         |         |         |        |        |        |        |
|---------|---------|---------|--------|--------|--------|--------|
| 984.253 | 810.956 | 959.406 |        |        |        |        |
| -----   | -----   | -----   |        |        |        |        |
| 1.Re    | -0.007  | -0.004  | 0.000  | 0.000  | 0.000  | 0.098  |
| -0.055  | -0.021  | 0.000   |        |        |        |        |
| 2.O     | 0.001   | 0.002   | -0.007 | -0.251 | -0.099 | -0.539 |
| 0.330   | 0.129   | 0.593   |        |        |        |        |
| 3.O     | 0.001   | 0.002   | 0.007  | 0.251  | 0.099  | -0.539 |
| 0.330   | 0.129   | -0.593  |        |        |        |        |
| 4.C     | 0.152   | -0.021  | 0.000  | 0.000  | 0.000  | -0.064 |
| -0.021  | -0.043  | 0.000   |        |        |        |        |
| 5.H     | -0.502  | 0.245   | 0.028  | -0.091 | 0.223  | 0.054  |
| 0.037   | -0.057  | 0.014   |        |        |        |        |
| 6.H     | -0.502  | 0.245   | -0.028 | 0.091  | -0.223 | 0.054  |
| 0.037   | -0.057  | -0.014  |        |        |        |        |
| 7.C     | 0.055   | 0.064   | 0.000  | 0.000  | 0.000  | -0.059 |
| -0.008  | 0.043   | 0.000   |        |        |        |        |
| 8.H     | -0.396  | 0.210   | 0.000  | 0.000  | 0.000  | 0.122  |
| -0.052  | 0.052   | 0.000   |        |        |        |        |
| 9.H     | 0.101   | -0.246  | 0.030  | -0.197 | 0.131  | 0.054  |
| 0.021   | -0.102  | 0.004   |        |        |        |        |
| 10.H    | 0.101   | -0.246  | -0.030 | 0.197  | -0.131 | 0.054  |
| 0.021   | -0.102  | -0.004  |        |        |        |        |

|          |          |          |        |        |        |        |
|----------|----------|----------|--------|--------|--------|--------|
| 1395.002 | 1201.526 | 1310.358 |        |        |        |        |
| -----    | -----    | -----    |        |        |        |        |
| 1.Re     | 0.000    | 0.001    | 0.000  | -0.001 | -0.002 | 0.000  |
| 0.000    | 0.000    | 0.001    |        |        |        |        |
| 2.O      | 0.000    | -0.003   | -0.005 | 0.000  | -0.001 | 0.001  |
| 0.000    | 0.000    | -0.001   |        |        |        |        |
| 3.O      | 0.000    | -0.003   | 0.005  | 0.000  | -0.001 | -0.001 |
| 0.000    | 0.000    | -0.001   |        |        |        |        |
| 4.C      | 0.003    | 0.001    | 0.000  | 0.054  | 0.120  | 0.000  |
| 0.000    | 0.000    | -0.001   |        |        |        |        |
| 5.H      | -0.013   | -0.003   | -0.005 | -0.208 | -0.526 | -0.414 |

Supplementary Material (ESI) for Dalton Transactions  
 This journal is © The Royal Society of Chemistry 2002

|        |        |        |        |        |        |        |        |
|--------|--------|--------|--------|--------|--------|--------|--------|
| -0.004 | 0.003  | 0.000  |        |        |        |        |        |
|        | 6.H    | -0.013 | -0.003 | 0.005  | -0.208 | -0.526 | 0.414  |
| 0.004  | -0.003 | 0.000  |        |        |        |        |        |
|        | 7.C    | -0.111 | 0.074  | 0.000  | 0.002  | -0.001 | 0.000  |
| 0.000  | 0.000  | 0.069  |        |        |        |        |        |
|        | 8.H    | 0.544  | -0.169 | 0.000  | -0.004 | 0.003  | 0.000  |
| 0.000  | 0.000  | -0.743 |        |        |        |        |        |
|        | 9.H    | 0.376  | -0.379 | -0.208 | -0.006 | 0.004  | 0.004  |
| 0.033  | 0.463  | -0.074 |        |        |        |        |        |
|        | 10.H   | 0.376  | -0.379 | 0.208  | -0.006 | 0.004  | -0.004 |
| -0.033 | -0.463 | -0.074 |        |        |        |        |        |

|          |        |        |          |        |        |          |        |
|----------|--------|--------|----------|--------|--------|----------|--------|
|          |        |        | 1399.995 |        |        | 2954.737 |        |
| 3021.892 |        |        |          |        |        |          |        |
|          |        |        | -----    |        |        | -----    |        |
|          | 1.Re   | 0.001  | 0.001    | 0.000  | 0.000  | 0.000    | 0.000  |
| 0.000    | 0.000  | 0.000  |          |        |        |          |        |
|          | 2.O    | -0.001 | -0.001   | -0.001 | 0.000  | 0.000    | 0.000  |
| 0.000    | 0.000  | 0.000  |          |        |        |          |        |
|          | 3.O    | -0.001 | -0.001   | 0.001  | 0.000  | 0.000    | 0.000  |
| 0.000    | 0.000  | 0.000  |          |        |        |          |        |
|          | 4.C    | -0.001 | -0.001   | 0.000  | 0.000  | 0.000    | 0.000  |
| 0.020    | 0.060  | 0.000  |          |        |        |          |        |
|          | 5.H    | -0.003 | 0.001    | 0.001  | 0.001  | 0.001    | 0.000  |
| -0.111   | -0.340 | 0.608  |          |        |        |          |        |
|          | 6.H    | -0.003 | 0.001    | -0.001 | 0.001  | 0.001    | 0.000  |
| -0.111   | -0.340 | -0.608 |          |        |        |          |        |
|          | 7.C    | 0.033  | 0.056    | 0.000  | 0.022  | -0.041   | 0.000  |
| 0.001    | 0.000  | 0.000  |          |        |        |          |        |
|          | 8.H    | 0.374  | -0.084   | 0.000  | 0.251  | 0.692    | 0.000  |
| -0.001   | -0.004 | 0.000  |          |        |        |          |        |
|          | 9.H    | -0.419 | -0.327   | 0.377  | -0.255 | -0.098   | -0.391 |
| -0.002   | 0.000  | -0.003 |          |        |        |          |        |
|          | 10.H   | -0.419 | -0.327   | -0.377 | -0.255 | -0.098   | 0.391  |
| -0.002   | 0.000  | 0.003  |          |        |        |          |        |

|          |        |        |          |        |        |          |        |
|----------|--------|--------|----------|--------|--------|----------|--------|
|          |        |        | 3046.567 |        |        | 3066.959 |        |
| 3121.746 |        |        |          |        |        |          |        |
|          |        |        | -----    |        |        | -----    |        |
|          | 1.Re   | 0.000  | 0.000    | 0.000  | 0.000  | 0.000    | 0.000  |
| 0.000    | 0.000  | 0.000  |          |        |        |          |        |
|          | 2.O    | 0.000  | 0.000    | 0.000  | 0.000  | 0.000    | 0.000  |
| 0.000    | 0.000  | 0.000  |          |        |        |          |        |
|          | 3.O    | 0.000  | 0.000    | 0.000  | 0.000  | 0.000    | 0.000  |
| 0.000    | 0.000  | 0.000  |          |        |        |          |        |
|          | 4.C    | 0.000  | 0.001    | 0.000  | 0.000  | 0.000    | 0.000  |
| 0.000    | 0.000  | -0.098 |          |        |        |          |        |
|          | 5.H    | 0.000  | -0.002   | 0.005  | 0.001  | -0.001   | 0.001  |
| -0.117   | -0.364 | 0.590  |          |        |        |          |        |
|          | 6.H    | 0.000  | -0.002   | -0.005 | -0.001 | 0.001    | 0.001  |
| 0.117    | 0.364  | 0.590  |          |        |        |          |        |
|          | 7.C    | -0.065 | -0.065   | 0.000  | 0.000  | 0.000    | -0.093 |
| 0.000    | 0.000  | 0.000  |          |        |        |          |        |
|          | 8.H    | 0.206  | 0.628    | 0.000  | 0.000  | 0.000    | -0.021 |
| 0.000    | 0.000  | 0.000  |          |        |        |          |        |
|          | 9.H    | 0.279  | 0.080    | 0.439  | 0.398  | 0.128    | 0.567  |
| 0.000    | -0.001 | -0.001 |          |        |        |          |        |

Supplementary Material (ESI) for Dalton Transactions  
 This journal is © The Royal Society of Chemistry 2002

10.H            0.279    0.080    -0.439            -0.398    -0.128    0.567  
 0.000    0.001    -0.001

List of All Frequencies:

Intensities  
 =====

| Intensity (degeneracy not counted) | Frequency<br>cm-1 | Dipole Strength<br>1e-40 esu2 cm2 | Absorption<br>km/mole |
|------------------------------------|-------------------|-----------------------------------|-----------------------|
|                                    | 172.132019        | 1.394816                          | 0.060181              |
|                                    | 204.559886        | 8.762388                          | 0.449284              |
|                                    | 205.839022        | 71.643911                         | 3.696452              |
|                                    | 218.712186        | 109.237122                        | 5.988545              |
|                                    | 262.222809        | 30.070662                         | 1.976476              |
|                                    | 282.095695        | 14.831052                         | 1.048688              |
|                                    | 535.634914        | 20.090171                         | 2.697308              |
|                                    | 538.746300        | 73.638390                         | 9.944127              |
|                                    | 634.629575        | 0.019426                          | 0.003090              |
|                                    | 728.374146        | 0.548261                          | 0.100097              |
|                                    | 743.428746        | 108.637714                        | 20.244080             |
|                                    | 789.315602        | 91.564895                         | 18.115810             |
|                                    | 810.956305        | 98.712063                         | 20.065305             |
|                                    | 959.406010        | 668.127875                        | 160.671962            |
|                                    | 984.253476        | 198.233968                        | 48.906108             |
|                                    | 1201.525793       | 8.333866                          | 2.509907              |
|                                    | 1310.358036       | 29.545330                         | 9.704136              |
|                                    | 1395.002173       | 21.763516                         | 7.609954              |
|                                    | 1399.995044       | 21.050517                         | 7.386987              |
|                                    | 2954.737443       | 1.441253                          | 1.067425              |
|                                    | 3021.892306       | 9.211235                          | 6.977099              |
|                                    | 3046.566536       | 2.126552                          | 1.623921              |
|                                    | 3066.958978       | 0.513706                          | 0.394913              |
|                                    | 3121.745608       | 1.831005                          | 1.432733              |

=====  
 Statistical Thermal Analysis \*\*\* ideal gas assumed \*\*\*  
 =====

Pressure:                    1.000000 atm.  
 Temperature:                298.150000 K

Moments of Inertia (and direction vectors)  
 =====

| 523.7326 | 535.2715 | 557.4587 |
|----------|----------|----------|
| 0.7600   | 0.0000   | 0.6499   |
| -0.6499  | 0.0000   | 0.7600   |

Supplementary Material (ESI) for Dalton Transactions  
This journal is © The Royal Society of Chemistry 2002

0.0000                      1.0000                      0.0000

|        | Temp  |        |       |  |
|--------|-------|--------|-------|--|
| Transl | Rotat | Vibrat | Total |  |
| -----  | ----- | -----  | ----- |  |

|        |                       |        |        |
|--------|-----------------------|--------|--------|
| 298.15 | Entropy (cal/mole-K): |        |        |
| 42.425 | 26.549                | 14.519 | 83.494 |

|                              |       |        |        |
|------------------------------|-------|--------|--------|
| Internal Energy (Kcal/mole): |       |        |        |
| 0.889                        | 0.889 | 43.489 | 45.266 |

|                                             |       |        |        |
|---------------------------------------------|-------|--------|--------|
| Constant Volume Heat Capacity (cal/mole-K): |       |        |        |
| 2.981                                       | 2.981 | 18.304 | 24.265 |

\*\*\*\*\*
