# Supplementary material for: Vibrational properties and matrix photochemistry of trimethyldioxorhenium(vii), (CH3)3ReO2Electronic supplementary information (ESI) available: further details concerning the vibrational calculations and cartesion coordinates of the optimised geometries. See http://www.rsc.org/suppdata/dt/b2/b204238j/
Source: Royal Society of Chemistry journal article supplement (doi:10.1039/b204238j), 2002-08-07
Supplement: b204238j-4.pdf [file b204238j-4.pdf]

ReO2 (CD3) 3

\*\*\*\*\*  
 \* F R E Q U E N C I E S \*  
 \*\*\*\*\*

Coordinates (Cartesian)

=====

| Atom<br>angstrom | bohr<br>Geometric Variables |                       |           |           |  |
|------------------|-----------------------------|-----------------------|-----------|-----------|--|
|                  | X                           | Y                     | Z         | X         |  |
| Y                | Z                           | (0:frozen, *:LT par.) |           |           |  |
| -----            |                             |                       |           |           |  |
| 1 Re             | 1.672824                    | 0.000000              | 0.000000  | 0.885220  |  |
| 0.000000         | 0.000000                    | 1                     | 2         | 3         |  |
| 2 O              | 3.349267                    | 2.783318              | 0.000000  | 1.772355  |  |
| 1.472868         | 0.000000                    | 4                     | 5         | 6         |  |
| 3 O              | 3.151133                    | -2.896472             | 0.000000  | 1.667508  |  |
| -1.532746        | 0.000000                    | 7                     | 8         | 9         |  |
| 4 C              | -2.489014                   | 0.081296              | 0.000000  | -1.317129 |  |
| 0.043020         | 0.000000                    | 10                    | 11        | 12        |  |
| 5 H              | -3.305568                   | 0.951089              | 1.690243  | -1.749231 |  |
| 0.503295         | 0.894438                    | 13                    | 14        | 15        |  |
| 6 H              | -3.305568                   | 0.951089              | -1.690243 | -1.749231 |  |
| 0.503295         | -0.894438                   | 16                    | 17        | 18        |  |
| 7 H              | -3.019126                   | -1.932462             | 0.000000  | -1.597652 |  |
| -1.022614        | 0.000000                    | 19                    | 20        | 21        |  |
| 8 C              | 0.564464                    | 0.004882              | -3.888607 | 0.298701  |  |
| 0.002583         | -2.057762                   | 22                    | 23        | 24        |  |
| 9 H              | 2.396416                    | -0.251498             | -4.847558 | 1.268128  |  |
| -0.133087        | -2.565217                   | 25                    | 26        | 27        |  |
| 10 H             | -0.719052                   | -1.542643             | -4.372191 | -0.380506 |  |
| -0.816331        | -2.313663                   | 28                    | 29        | 30        |  |
| 11 H             | -0.268803                   | 1.820329              | -4.425020 | -0.142244 |  |
| 0.963276         | -2.341619                   | 31                    | 32        | 33        |  |
| 12 C             | 0.564464                    | 0.004882              | 3.888607  | 0.298701  |  |
| 0.002583         | 2.057762                    | 34                    | 35        | 36        |  |
| 13 H             | -0.719052                   | -1.542643             | 4.372191  | -0.380506 |  |
| -0.816331        | 2.313663                    | 37                    | 38        | 39        |  |
| 14 H             | 2.396416                    | -0.251498             | 4.847558  | 1.268128  |  |
| -0.133087        | 2.565217                    | 40                    | 41        | 42        |  |
| 15 H             | -0.268803                   | 1.820329              | 4.425020  | -0.142244 |  |
| 0.963276         | 2.341619                    | 43                    | 44        | 45        |  |

Atomic Masses:

-----

|       |              |
|-------|--------------|
| 1. Re | 186.95575000 |
| 2. O  | 15.99491400  |
| 3. O  | 15.99491400  |
| 4. C  | 12.00000000  |
| 5. H  | 2.00000000   |
| 6. H  | 2.00000000   |
| 7. H  | 2.00000000   |
| 8. C  | 12.00000000  |

```

    9. H          2.00000000
   10. H          2.00000000
   11. H          2.00000000
   12. C         12.00000000
   13. H          2.00000000
   14. H          2.00000000
   15. H          2.00000000
    
```

AA

Frequencies and Normal Modes

```

=====
      1           2           3           4           5
      7           8
6      67.1256    181.9209    205.8878    235.6110    285.1536
420.9760    469.2646    564.0522
-----
-----
      1  -0.03890576 -0.03847802 -0.17663075 -0.39241723 -0.58100750
-0.20366955 -0.45921600  0.18001504
      2  -0.21979325  0.11009585 -0.60117783  0.30978645  0.01333026
-0.04710421 -0.03995357 -0.16086304
      3   0.18609324  0.14370741 -0.61563472 -0.24663101  0.34412275
-0.12627798 -0.16006265 -0.05015898
      4  -0.30862833 -0.06285854  0.02110689  0.27794811 -0.55357925
-0.04037996 -0.07187345 -0.08535644
      5  -0.34414763 -0.25146465  0.20880428 -0.54262772  0.28423448
-0.08079195 -0.09679608  0.15908037
      6  -0.74076201 -0.23533519 -0.05461317  0.06646766  0.23418896
-0.02005724  0.00237421 -0.19779342
      7  -0.02970744 -0.03832642 -0.15139931 -0.26390828 -0.18735743
0.47690493  0.33464574 -0.19166981
      8  -0.18731372  0.37201216 -0.03123619 -0.02232291  0.00129984  0.09997836
0.18065804  0.49672032
      9  -0.00472309 -0.01457352 -0.07808359 -0.18403818 -0.13135971
-0.53040507  0.51488991 -0.08200055
     10   0.00064919  0.01071580  0.01271103 -0.01237390  0.07346674
-0.12117354 -0.21088056  0.01815850
     11   0.00388462 -0.19390369 -0.09545353  0.07404300 -0.00255544
-0.02192596 -0.03151282  0.06002592
     12   0.00008236 -0.00265505 -0.00148715  0.00990230  0.00209963
0.00735662  0.00953109  0.04342981
     13   0.00123580  0.07983751  0.00683520 -0.25150020 -0.12513338
0.26847403  0.04982040 -0.52640681
     14  -0.17506428  0.47212978  0.07544121 -0.11038974 -0.02667551
0.04753320  0.01994688 -0.04208667
     15  -0.02302822 -0.25768091 -0.27251314 -0.05586170 -0.10817913
0.35337198  0.32723307  0.46666103
     16  -0.21788036  0.60593650  0.11445925 -0.10495605 -0.00122588
0.01032072  0.00765957  0.01164136
     17   0.00295397  0.01881728  0.06497876  0.15869481 -0.01834643
-0.39263977  0.34173753  0.05462535
     18   0.00465433  0.00212146  0.02129178  0.03950630  0.00886554
-0.03348928  0.02461084  0.00370969
     19   0.02620357 -0.00529299  0.02759178 -0.01105855  0.00226353
-0.00210541  0.00480680 -0.04977817
     20  -0.14035924  0.00101487 -0.20498804 -0.16446556 -0.09790154
-0.14507013  0.14680084  0.05915754
    
```

Supplementary Material (ESI) for Dalton Transactions  
This journal is © The Royal Society of Chemistry 2002

21 -0.00370634 -0.00131666 -0.00633860 -0.01022434 0.00590313  
0.01313198 -0.01469334 -0.00139680  
22 0.13431214 -0.04642113 0.03852416 -0.24444164 -0.07659126  
-0.14827834 0.20705643 -0.25634970

14 9 10 11 12 13  
15 16  
569.9179 635.9824 912.3411 938.6632 953.6128  
989.5878 1013.4789 1019.7903

-----  
-----  
-----  
1 0.07219108 0.19300821 0.00504625 0.04064055 -0.00662938  
-0.37501786 0.00684658 0.05666865  
2 0.11670700 0.00843983 -0.02762887 -0.07806139 -0.65552420  
-0.02467210 0.00363644 -0.02689198  
3 0.06985285 0.18048636 0.05249706 -0.01354100 0.45034625  
0.31315644 -0.00984533 -0.02347324  
4 0.09379000 0.00106286 0.04397554 -0.05440481 0.21993297  
0.65787786 -0.01225551 -0.07705410  
5 -0.00885167 0.16298463 0.01584765 -0.13254286 -0.39298910  
0.39319665 -0.00033362 -0.06861246  
6 0.13877045 -0.00362737 -0.00066917 0.09853816 0.36947000  
-0.35342531 -0.01053932 0.05747305  
7 -0.07145091 0.21318759 0.39514582 0.42852868 -0.07987212  
0.02209454 0.02989440 0.03664976  
8 0.20224636 -0.06902760 0.09756358 0.13898182 0.03579119  
0.01695345 0.00766707 -0.14305411  
9 -0.03455557 -0.04433740 -0.44578821 0.36046397 -0.02295460  
0.03946672 -0.01069997 -0.08241215  
10 0.01130352 -0.38630776 0.07133834 0.35409426 -0.06633108  
0.13921995 0.02966472 0.43364129  
11 -0.37966626 0.00612388 0.04809909 0.04895806 0.00490434  
0.00289533 -0.51850979 -0.02095943  
12 0.00978107 -0.00956174 -0.09853541 -0.09030718 0.04327810  
-0.00293361 -0.01985908 -0.20578198  
13 -0.16327921 0.06410959 -0.28950770 -0.22987971 0.01788134  
0.01285339 0.01262535 0.05062331  
14 -0.05566182 0.01812326 -0.26511457 -0.33134708 0.03511891  
-0.03190848 -0.10457264 0.24354624  
15 0.13407631 -0.06478830 -0.28832882 -0.25746540 0.08070273  
-0.00227344 -0.03294186 0.21670946  
16 -0.05177235 0.00360729 0.10572961 0.12512756 -0.00735235  
0.01195741 -0.12248676 -0.03786890  
17 -0.07927882 0.53698010 0.32074166 -0.23807887 0.01639029  
-0.06614180 0.02768084 0.21849134  
18 0.00467951 0.07034779 0.17281717 -0.11608989 -0.00783448  
0.05700036 0.17204227 0.54313903  
19 0.13650934 0.02046095 -0.03829837 -0.01939153 0.01157511  
-0.02095293 0.72905474 -0.17384377  
20 -0.56388238 -0.51397277 0.29986415 -0.26898557 0.05960104  
-0.04015747 0.24853373 -0.05239427  
21 -0.00851883 -0.02103069 -0.21195132 0.20312591 -0.03006573  
0.11789441 0.09728073 0.48469797  
22 0.60265298 -0.36743216 0.30872247 -0.25354162 -0.02426240  
-0.04160746 -0.26093429 0.03499491

17 18 19 20 21 22  
1058.0977 2115.3457 2123.9297 2250.5754 2265.5747 2298.1628  
-----  
-----  
-----  
-----  
-----  
-----

Supplementary Material (ESI) for Dalton Transactions  
 This journal is © The Royal Society of Chemistry 2002

|    |             |             |             |             |             |             |
|----|-------------|-------------|-------------|-------------|-------------|-------------|
| 1  | -0.03722468 | 0.00095278  | -0.00025116 | -0.00311846 | 0.00132199  | 0.00090426  |
| 2  | -0.02657480 | 0.00032244  | -0.00080000 | 0.00176237  | 0.00083715  | -0.00107167 |
| 3  | 0.02109969  | 0.00133775  | 0.00136075  | -0.00036996 | 0.00334574  | 0.00105196  |
| 4  | 0.04005873  | 0.00191434  | -0.00079670 | -0.00132257 | -0.00106398 | -0.00017304 |
| 5  | 0.00791679  | 0.00118418  | 0.00213870  | 0.00021421  | 0.00310010  | -0.00015881 |
| 6  | -0.01707285 | -0.00143496 | -0.00131292 | -0.00201674 | 0.00145117  | 0.00005033  |
| 7  | 0.16701010  | 0.02800821  | -0.24166353 | 0.08455245  | -0.01162637 | 0.00384796  |
| 8  | -0.34385162 | 0.01759510  | -0.11669535 | -0.54840042 | 0.07682258  | -0.01673306 |
| 9  | 0.04509330  | -0.21322117 | -0.02913392 | 0.00074260  | 0.01349348  | 0.00611713  |
| 10 | -0.06385956 | 0.09593886  | -0.11372101 | -0.04467012 | -0.63669948 | -0.09248123 |
| 11 | -0.09833505 | -0.01177006 | -0.03199249 | -0.10596841 | 0.11607837  | -0.69925334 |
| 12 | -0.55332043 | 0.06865346  | -0.58553169 | 0.52497441  | -0.07407609 | 0.01933110  |
| 13 | -0.45009419 | 0.01548001  | 0.18666866  | -0.32570277 | -0.22043627 | 0.00467538  |
| 14 | 0.46734792  | 0.06090530  | -0.47223752 | -0.04852826 | -0.01364296 | -0.14053684 |
| 15 | 0.05355344  | -0.00492173 | 0.24011345  | 0.21905015  | -0.23493244 | -0.06612695 |
| 16 | -0.09183980 | -0.06854468 | 0.49072902  | 0.48691859  | -0.04115725 | -0.14851106 |
| 17 | -0.10466808 | 0.31299794  | 0.04059414  | -0.03733910 | -0.27685968 | -0.00240050 |
| 18 | -0.22208115 | -0.70771691 | -0.08810135 | 0.02930179  | 0.24024478  | -0.05828028 |
| 19 | 0.04651416  | 0.06911138  | 0.00997028  | 0.02139571  | -0.02206450 | -0.63615685 |
| 20 | 0.00606977  | 0.09383009  | 0.01322933  | 0.01049213  | 0.10424513  | 0.14653949  |
| 21 | -0.17867607 | 0.55408052  | 0.06425371  | 0.08038582  | 0.55126612  | 0.01012382  |
| 22 | -0.02703044 | 0.10624666  | 0.01355442  | 0.02175129  | 0.11884590  | -0.16095956 |

Intensities

=====

| Intensity (degeneracy not counted) | Frequency<br>cm-1 | Dipole Strength<br>1e-40 esu2 cm2 | Absorption<br>km/mole |
|------------------------------------|-------------------|-----------------------------------|-----------------------|
|                                    | 67.125645         | 54.113894                         | 0.910490              |
|                                    | 181.920898        | 4.662707                          | 0.212617              |
|                                    | 205.887794        | 17.216713                         | 0.888503              |
|                                    | 235.611008        | 22.631725                         | 1.336569              |
|                                    | 285.153605        | 2.331025                          | 0.166611              |
|                                    | 420.975956        | 0.428968                          | 0.045265              |
|                                    | 469.264638        | 35.497168                         | 4.175318              |
|                                    | 564.052157        | 9.174046                          | 1.297055              |
|                                    | 569.917923        | 4.369843                          | 0.624247              |
|                                    | 635.982445        | 19.273592                         | 3.072457              |
|                                    | 912.341150        | 8.470349                          | 1.937031              |
|                                    | 938.663222        | 23.678478                         | 5.571109              |
|                                    | 953.612776        | 564.871749                        | 135.020585            |
|                                    | 989.587762        | 218.313447                        | 54.151797             |
|                                    | 1013.478916       | 39.992018                         | 10.159354             |
|                                    | 1019.790325       | 4.615220                          | 1.179727              |
|                                    | 1058.097727       | 5.312839                          | 1.409063              |
|                                    | 2115.345698       | 2.643901                          | 1.401860              |
|                                    | 2123.929731       | 8.604762                          | 4.580966              |
|                                    | 2250.575418       | 7.662042                          | 4.322313              |
|                                    | 2265.574683       | 14.226045                         | 8.078684              |
|                                    | 2298.162813       | 2.676230                          | 1.541638              |

AAA

Frequencies and Normal Modes

=====

1 2 3 4 5

Supplementary Material (ESI) for Dalton Transactions  
This journal is © The Royal Society of Chemistry 2002

| 6           | 7                     | 8                     |             |             |             |
|-------------|-----------------------|-----------------------|-------------|-------------|-------------|
| 467.5008    | 88.5338<br>565.5130   | 178.6491<br>573.9012  | 203.8249    | 234.7384    | 338.0386    |
| -----       |                       |                       |             |             |             |
| 1           | -0.09927140           | -0.13028126           | 0.66909773  | 0.04768872  | -0.32037027 |
| -0.61745515 | -0.13651513           | -0.00954630           |             |             |             |
| 2           | 0.09251122            | -0.01745098           | -0.48994934 | 0.75529746  | -0.17112690 |
| -0.36028764 | -0.09823584           | -0.09128370           |             |             |             |
| 3           | -0.09580516           | 0.20214568            | -0.51975619 | -0.61170534 | -0.25235890 |
| -0.47072932 | -0.09057646           | 0.07262218            |             |             |             |
| 4           | 0.03247278            | -0.01566303           | 0.01717505  | -0.01742981 | 0.53830380  |
| -0.37323729 | 0.07193484            | -0.00617873           |             |             |             |
| 5           | -0.08128655           | 0.00018812            | -0.03012203 | 0.01222735  | -0.27168525 |
| 0.11241910  | -0.09133103           | 0.00683355            |             |             |             |
| 6           | 0.06649268            | 0.00676796            | -0.01310513 | 0.00417116  | 0.10868488  |
| -0.16936366 | 0.55130858            | -0.01444444           |             |             |             |
| 7           | 0.19649004            | 0.02620796            | 0.01953131  | 0.05641346  | -0.02923709 |
| -0.00818256 | -0.00408544           | 0.58435313            |             |             |             |
| 8           | -0.33090336           | -0.11328116           | -0.05237416 | 0.01939417  | 0.49919002  |
| -0.19492297 | -0.10279912           | 0.04180544            |             |             |             |
| 9           | 0.09485670            | 0.00226529            | -0.02521427 | -0.01837025 | 0.22448170  |
| 0.06400028  | -0.10664049           | -0.01200311           |             |             |             |
| 10          | 0.64270553            | 0.17446336            | 0.07615980  | -0.06685999 | -0.14198958 |
| 0.00593493  | -0.03842005           | -0.07458270           |             |             |             |
| 11          | 0.57703043            | 0.13285085            | 0.05541957  | -0.06961691 | 0.29582041  |
| -0.19122588 | -0.12101340           | -0.05335102           |             |             |             |
| 12          | -0.01783768           | -0.00515518           | -0.00083712 | -0.00418853 | 0.12999905  |
| 0.08286508  | -0.76532186           | 0.11425445            |             |             |             |
| 13          | 0.02395374            | -0.08845239           | -0.01609330 | -0.01694895 | 0.00784059  |
| 0.01827856  | -0.08762804           | 0.02256582            |             |             |             |
| 14          | 0.15934434            | -0.63697475           | -0.11383220 | -0.11706556 | -0.04338461 |
| -0.00755471 | 0.01498464            | 0.08109201            |             |             |             |
| 15          | -0.04280582           | 0.14459204            | 0.02594129  | 0.11824037  | 0.00439026  |
| -0.01859639 | 0.11295404            | 0.77733300            |             |             |             |
| 16          | 0.16882862            | -0.66079353           | -0.11899753 | -0.10537449 | -0.04491876 |
| -0.01124221 | 0.02112780            | 0.09895154            |             |             |             |
| 17          | -0.02385949           | 0.09388619            | 0.00738664  | 0.01705391  | -0.00291638 |
| -0.01540002 | 0.03390386            | -0.00788593           |             |             |             |
| -----       |                       |                       |             |             |             |
| 14          | 9<br>15               | 10<br>16              | 11          | 12          | 13          |
| 2116.5665   | 652.9975<br>2261.5856 | 914.3683<br>2283.2338 | 1009.1403   | 1021.5516   | 1028.5286   |
| -----       |                       |                       |             |             |             |
| 1           | 0.14281782            | -0.01026059           | -0.00001928 | -0.00627515 | -0.00370155 |
| -0.00280470 | -0.00517769           | -0.00027416           |             |             |             |
| 2           | 0.04697843            | -0.03341696           | 0.00688601  | -0.01156267 | -0.00379333 |
| 0.00270039  | -0.00292708           | -0.00002928           |             |             |             |
| 3           | 0.07115876            | -0.04140399           | -0.00745552 | -0.00245924 | 0.00419406  |
| 0.00380249  | -0.00262485           | -0.00010759           |             |             |             |
| 4           | -0.41952855           | -0.02183013           | -0.19133920 | -0.13144013 | -0.27794145 |
| -0.00086923 | -0.04415095           | 0.50296686            |             |             |             |
| 5           | -0.08741989           | 0.82196055            | -0.10418393 | -0.17434943 | -0.04507115 |
| -0.33176118 | -0.05208811           | 0.23960157            |             |             |             |
| 6           | 0.20536231            | 0.28810467            | 0.04839502  | 0.36681238  | -0.14765209 |
| 0.02139094  | 0.59437535            | -0.04849979           |             |             |             |
| 7           | -0.00654081           | -0.00953625           | -0.39337303 | 0.13410312  | 0.18855592  |

Supplementary Material (ESI) for Dalton Transactions  
 This journal is © The Royal Society of Chemistry 2002

-0.01405855 -0.10372565 0.04138795  
 8 0.08917482 0.23803605 -0.12033437 -0.16803229 -0.00853324  
 -0.12968256 -0.11101196 -0.65746324  
 9 0.85261402 -0.01580066 -0.13943839 -0.17727418 -0.17289414  
 -0.00661369 -0.11206505 0.31981249  
 10 -0.08503914 0.01011084 -0.25384136 -0.25127192 -0.48209001  
 0.00894090 0.05108147 -0.37960386  
 11 0.02999768 0.21552205 0.36217384 0.11258933 0.51898708  
 -0.11975671 -0.12690190 -0.00890218  
 12 -0.05033221 0.09023441 0.05072247 0.25852812 -0.14985072  
 0.19927887 0.48264592 0.04319792  
 13 0.00756526 -0.19404596 0.17398630 0.48111167 -0.37308179  
 -0.70461920 -0.21237333 -0.01952662  
 14 -0.02027300 0.03047254 0.50515473 -0.32143831 -0.18450702  
 0.09990499 0.02141794 0.02741498  
 15 0.01849042 -0.00466825 0.29118173 -0.15288871 -0.13003589  
 -0.00983303 0.02432054 -0.03137406  
 16 -0.00032335 0.03534352 -0.41258469 0.26573099 0.14888310  
 0.07464432 -0.05921451 -0.03556650  
 17 0.00957796 0.29396320 0.15093247 0.41051311 -0.31117489  
 0.55327774 -0.55231555 -0.03982009

17

2298.0166

-----  
 1 -0.00069130  
 2 -0.00170817  
 3 0.00097579  
 4 -0.03558699  
 5 -0.02764512  
 6 0.10360090  
 7 0.62741626  
 8 0.07905504  
 9 -0.03428195  
 10 -0.06986125  
 11 -0.09398198  
 12 0.00577973  
 13 0.04312729  
 14 0.35831979  
 15 -0.46704334  
 16 -0.47181045  
 17 0.03770258

Intensities

=====

| Intensity (degeneracy not counted) | Frequency<br>cm-1 | Dipole Strength<br>1e-40 esu2 cm2 | Absorption<br>km/mole |
|------------------------------------|-------------------|-----------------------------------|-----------------------|
| -----                              | -----             | -----                             | -----                 |
|                                    | 88.533785         | 4.220458                          | 0.093658              |
|                                    | 178.649087        | 1.980847                          | 0.088701              |
|                                    | 203.824854        | 210.915290                        | 10.775645             |
|                                    | 234.738377        | 2.763278                          | 0.162587              |
|                                    | 338.038589        | 5.409358                          | 0.458342              |
|                                    | 467.500751        | 133.788910                        | 15.677633             |
|                                    | 565.513050        | 133.009998                        | 18.854065             |
|                                    | 573.901212        | 1.482407                          | 0.213247              |
|                                    | 652.997503        | 0.003857                          | 0.000631              |

Supplementary Material (ESI) for Dalton Transactions  
 This journal is © The Royal Society of Chemistry 2002

|             |           |          |
|-------------|-----------|----------|
| 914.368289  | 0.629933  | 0.144375 |
| 1009.140348 | 1.490264  | 0.376958 |
| 1021.551598 | 0.131161  | 0.033585 |
| 1028.528589 | 5.622367  | 1.449485 |
| 2116.566541 | 0.799755  | 0.424294 |
| 2261.585646 | 2.758495  | 1.563736 |
| 2283.233822 | 15.475479 | 8.856713 |
| 2298.016614 | 0.023049  | 0.013277 |

Zero-Point Energy : 0.086141 a.u.  
 =====  
 2.344030 eV

=====  
 Vibrations and Normal Modes \*\*\* (cartesian coordinates, NOT  
 mass-weighted) \*\*\*  
 =====

The headers on the normal mode eigenvectors below give the Frequency in cm<sup>-1</sup>  
 (a negative value means an imaginary frequency, no output for  
 (almost-)zero frequencies)

| 178.649       | 67.126 |        |        | 88.534 |        |        |
|---------------|--------|--------|--------|--------|--------|--------|
| -----         | -----  |        |        | -----  |        |        |
| 1.Re          | 0.003  | 0.017  | 0.000  | 0.000  | 0.000  | -0.006 |
| 0.000 0.000   | 0.008  |        |        |        |        |        |
| 2.O           | -0.070 | 0.058  | 0.000  | 0.000  | 0.000  | 0.040  |
| 0.000 0.000   | -0.014 |        |        |        |        |        |
| 3.O           | 0.085  | 0.056  | 0.000  | 0.000  | 0.000  | -0.017 |
| 0.000 0.000   | -0.075 |        |        |        |        |        |
| 4.C           | 0.006  | 0.203  | 0.000  | 0.000  | 0.000  | 0.022  |
| 0.000 0.000   | 0.000  |        |        |        |        |        |
| 5.H           | 0.068  | 0.263  | 0.000  | 0.084  | 0.473  | -0.179 |
| -0.012 -0.117 | 0.055  |        |        |        |        |        |
| 6.H           | 0.068  | 0.263  | 0.000  | -0.084 | -0.473 | -0.179 |
| 0.012 0.117   | 0.055  |        |        |        |        |        |
| 7.H           | -0.140 | 0.244  | 0.000  | 0.000  | 0.000  | 0.636  |
| 0.000 0.000   | -0.146 |        |        |        |        |        |
| 8.C           | -0.022 | -0.233 | 0.002  | 0.023  | 0.023  | -0.004 |
| 0.010 -0.022  | 0.002  |        |        |        |        |        |
| 9.H           | -0.045 | -0.375 | -0.003 | 0.037  | 0.120  | -0.005 |
| 0.066 0.332   | 0.015  |        |        |        |        |        |
| 10.H          | -0.077 | -0.231 | 0.137  | 0.099  | -0.039 | -0.014 |
| 0.327 -0.291  | 0.012  |        |        |        |        |        |
| 11.H          | 0.028  | -0.250 | -0.131 | -0.072 | -0.015 | 0.014  |
| -0.350 -0.197 | -0.017 |        |        |        |        |        |
| 12.C          | -0.022 | -0.233 | -0.002 | -0.023 | -0.023 | -0.004 |
| -0.010 0.022  | 0.002  |        |        |        |        |        |
| 13.H          | -0.077 | -0.231 | -0.137 | -0.099 | 0.039  | -0.014 |
| -0.327 0.291  | 0.012  |        |        |        |        |        |
| 14.H          | -0.045 | -0.375 | 0.003  | -0.037 | -0.120 | -0.005 |
| -0.066 -0.332 | 0.015  |        |        |        |        |        |
| 15.H          | 0.028  | -0.250 | 0.131  | 0.072  | 0.015  | 0.014  |
| 0.350 0.197   | -0.017 |        |        |        |        |        |

|         |        |        | 181.921 |        |        | 203.825 |        |        |
|---------|--------|--------|---------|--------|--------|---------|--------|--------|
| 205.888 |        |        | -----   |        |        | -----   |        |        |
| 1.Re    |        |        | -0.002  | 0.006  | 0.000  | 0.000   | 0.000  | 0.090  |
| 0.016   | 0.053  | 0.000  |         |        |        |         |        |        |
| 2.O     |        |        | 0.051   | -0.026 | 0.000  | 0.000   | 0.000  | -0.543 |
| 0.268   | -0.088 | 0.000  |         |        |        |         |        |        |
| 3.O     |        |        | -0.067  | -0.027 | 0.000  | 0.000   | 0.000  | -0.481 |
| -0.157  | -0.024 | 0.000  |         |        |        |         |        |        |
| 4.C     |        |        | -0.004  | 0.048  | 0.000  | 0.000   | 0.000  | -0.057 |
| -0.004  | -0.178 | 0.000  |         |        |        |         |        |        |
| 5.H     |        |        | 0.000   | 0.055  | -0.002 | -0.095  | 0.122  | -0.164 |
| -0.130  | -0.301 | 0.002  |         |        |        |         |        |        |
| 6.H     |        |        | 0.000   | 0.055  | 0.002  | 0.095   | -0.122 | -0.164 |
| -0.130  | -0.301 | -0.002 |         |        |        |         |        |        |
| 7.H     |        |        | -0.025  | 0.055  | 0.000  | 0.000   | 0.000  | 0.060  |
| 0.285   | -0.257 | 0.000  |         |        |        |         |        |        |
| 8.C     |        |        | 0.019   | -0.025 | -0.004 | 0.123   | 0.020  | 0.009  |
| -0.116  | -0.102 | 0.035  |         |        |        |         |        |        |
| 9.H     |        |        | 0.080   | 0.334  | 0.014  | 0.142   | -0.124 | 0.103  |
| -0.193  | -0.237 | -0.072 |         |        |        |         |        |        |
| 10.H    |        |        | 0.344   | -0.299 | 0.001  | 0.017   | 0.120  | -0.009 |
| -0.195  | -0.097 | 0.226  |         |        |        |         |        |        |
| 11.H    |        |        | -0.346  | -0.205 | -0.034 | 0.301   | 0.104  | 0.028  |
| -0.106  | -0.119 | -0.042 |         |        |        |         |        |        |
| 12.C    |        |        | 0.019   | -0.025 | 0.004  | -0.123  | -0.020 | 0.009  |
| -0.116  | -0.102 | -0.035 |         |        |        |         |        |        |
| 13.H    |        |        | 0.344   | -0.299 | -0.001 | -0.017  | -0.120 | -0.009 |
| -0.195  | -0.097 | -0.226 |         |        |        |         |        |        |
| 14.H    |        |        | 0.080   | 0.334  | -0.014 | -0.142  | 0.124  | 0.103  |
| -0.193  | -0.237 | 0.072  |         |        |        |         |        |        |
| 15.H    |        |        | -0.346  | -0.205 | 0.034  | -0.301  | -0.104 | 0.028  |
| -0.106  | -0.119 | 0.042  |         |        |        |         |        |        |

|         |        |        | 234.738 |        |        | 235.611 |        |        |
|---------|--------|--------|---------|--------|--------|---------|--------|--------|
| 285.154 |        |        | -----   |        |        | -----   |        |        |
| 1.Re    |        |        | 0.000   | 0.000  | 0.005  | -0.031  | 0.024  | 0.000  |
| 0.086   | -0.002 | 0.000  |         |        |        |         |        |        |
| 2.O     |        |        | 0.000   | 0.000  | 0.357  | -0.014  | 0.021  | 0.000  |
| -0.436  | 0.346  | 0.000  |         |        |        |         |        |        |
| 3.O     |        |        | 0.000   | 0.000  | -0.388 | -0.175  | -0.046 | 0.000  |
| -0.473  | -0.320 | 0.000  |         |        |        |         |        |        |
| 4.C     |        |        | 0.000   | 0.000  | -0.018 | 0.034   | -0.074 | 0.000  |
| 0.144   | -0.010 | 0.000  |         |        |        |         |        |        |
| 5.H     |        |        | -0.020  | 0.014  | -0.035 | 0.007   | -0.115 | 0.010  |
| 0.161   | 0.000  | -0.004 |         |        |        |         |        |        |
| 6.H     |        |        | 0.020   | -0.014 | -0.035 | 0.007   | -0.115 | -0.010 |
| 0.161   | 0.000  | 0.004  |         |        |        |         |        |        |
| 7.H     |        |        | 0.000   | 0.000  | -0.005 | 0.133   | -0.101 | 0.000  |
| 0.190   | -0.015 | 0.000  |         |        |        |         |        |        |
| 8.C     |        |        | -0.009  | -0.181 | -0.002 | 0.199   | -0.064 | -0.073 |
| -0.112  | 0.005  | 0.096  |         |        |        |         |        |        |
| 9.H     |        |        | -0.042  | -0.421 | 0.001  | 0.303   | -0.192 | 0.155  |
| -0.141  | 0.005  | 0.033  |         |        |        |         |        |        |
| 10.H    |        |        | -0.106  | -0.159 | 0.181  | 0.194   | -0.031 | -0.160 |
| -0.114  | -0.015 | 0.176  |         |        |        |         |        |        |



Supplementary Material (ESI) for Dalton Transactions  
 This journal is © The Royal Society of Chemistry 2002

|        |        |        |        |       |        |        |
|--------|--------|--------|--------|-------|--------|--------|
| 11.H   | 0.085  | -0.192 | -0.184 | 0.357 | -0.038 | -0.238 |
| -0.133 | 0.003  | 0.138  |        |       |        |        |
| 12.C   | 0.009  | 0.181  | -0.002 | 0.199 | -0.064 | 0.073  |
| -0.112 | 0.005  | -0.096 |        |       |        |        |
| 13.H   | 0.106  | 0.159  | 0.181  | 0.194 | -0.031 | 0.160  |
| -0.114 | -0.015 | -0.176 |        |       |        |        |
| 14.H   | 0.042  | 0.421  | 0.001  | 0.303 | -0.192 | -0.155 |
| -0.141 | 0.005  | -0.033 |        |       |        |        |
| 15.H   | -0.085 | 0.192  | -0.184 | 0.357 | -0.038 | 0.238  |
| -0.133 | 0.003  | -0.138 |        |       |        |        |

|         |        |         |        |         |        |        |
|---------|--------|---------|--------|---------|--------|--------|
|         |        | 338.039 |        | 420.976 |        |        |
| 467.501 |        |         |        |         |        |        |
|         |        | -----   |        | -----   |        |        |
| 1.Re    | 0.000  | 0.000   | -0.024 | -0.017  | -0.004 | 0.000  |
| 0.000   | 0.000  | -0.053  |        |         |        |        |
| 2.O     | 0.000  | 0.000   | 0.000  | -0.016  | -0.018 | 0.000  |
| 0.000   | 0.000  | -0.012  |        |         |        |        |
| 3.O     | 0.000  | 0.000   | -0.014 | 0.012   | 0.013  | 0.000  |
| 0.000   | 0.000  | -0.023  |        |         |        |        |
| 4.C     | 0.000  | 0.000   | 0.303  | 0.300   | 0.047  | 0.000  |
| 0.000   | 0.000  | -0.061  |        |         |        |        |
| 5.H     | 0.142  | -0.117  | 0.429  | 0.248   | -0.032 | 0.007  |
| 0.019   | 0.001  | -0.056  |        |         |        |        |
| 6.H     | -0.142 | 0.117   | 0.429  | 0.248   | -0.032 | -0.007 |
| -0.019  | -0.001 | -0.056  |        |         |        |        |
| 7.H     | 0.000  | 0.000   | 0.234  | 0.465   | 0.000  | 0.000  |
| 0.000   | 0.000  | -0.066  |        |         |        |        |
| 8.C     | 0.133  | -0.013  | -0.028 | -0.042  | 0.008  | -0.215 |
| 0.033   | -0.005 | 0.311   |        |         |        |        |
| 9.H     | 0.224  | -0.052  | 0.151  | -0.136  | 0.031  | -0.390 |
| 0.112   | -0.006 | 0.454   |        |         |        |        |
| 10.H    | 0.164  | -0.003  | -0.141 | -0.079  | 0.011  | -0.144 |
| 0.070   | -0.013 | 0.265   |        |         |        |        |
| 11.H    | 0.225  | 0.001   | -0.128 | -0.118  | -0.003 | -0.147 |
| 0.088   | 0.010  | 0.302   |        |         |        |        |
| 12.C    | -0.133 | 0.013   | -0.028 | -0.042  | 0.008  | 0.215  |
| -0.033  | 0.005  | 0.311   |        |         |        |        |
| 13.H    | -0.164 | 0.003   | -0.141 | -0.079  | 0.011  | 0.144  |
| -0.070  | 0.013  | 0.265   |        |         |        |        |
| 14.H    | -0.224 | 0.052   | 0.151  | -0.136  | 0.031  | 0.390  |
| -0.112  | 0.006  | 0.454   |        |         |        |        |
| 15.H    | -0.225 | -0.001  | -0.128 | -0.118  | -0.003 | 0.147  |
| -0.088  | -0.010 | 0.302   |        |         |        |        |

|         |        |         |       |         |        |        |
|---------|--------|---------|-------|---------|--------|--------|
|         |        | 469.265 |       | 564.052 |        |        |
| 565.513 |        |         |       |         |        |        |
|         |        | -----   |       | -----   |        |        |
| 1.Re    | -0.038 | -0.003  | 0.000 | -0.012  | 0.011  | 0.000  |
| 0.000   | 0.000  | -0.009  |       |         |        |        |
| 2.O     | 0.016  | -0.036  | 0.000 | 0.049   | 0.004  | 0.000  |
| 0.000   | 0.000  | -0.008  |       |         |        |        |
| 3.O     | 0.055  | 0.025   | 0.000 | -0.037  | 0.031  | 0.000  |
| 0.000   | 0.000  | 0.002   |       |         |        |        |
| 4.C     | 0.285  | 0.086   | 0.000 | 0.119   | -0.194 | 0.000  |
| 0.000   | 0.000  | 0.050   |       |         |        |        |
| 5.H     | 0.160  | -0.061  | 0.010 | 0.441   | 0.159  | -0.036 |

Supplementary Material (ESI) for Dalton Transactions  
 This journal is © The Royal Society of Chemistry 2002

|        |        |        |        |        |        |        |        |
|--------|--------|--------|--------|--------|--------|--------|--------|
| -0.032 | -0.033 | 0.050  |        |        |        |        |        |
|        | 6.H    | 0.160  | -0.061 | -0.010 | 0.441  | 0.159  | 0.036  |
| 0.032  | 0.033  | 0.050  |        |        |        |        |        |
|        | 7.H    | 0.596  | 0.000  | 0.000  | -0.625 | 0.010  | 0.000  |
| 0.000  | 0.000  | 0.020  |        |        |        |        |        |
|        | 8.C    | 0.005  | -0.002 | 0.214  | 0.012  | -0.047 | 0.027  |
| 0.151  | 0.001  | 0.011  |        |        |        |        |        |
|        | 9.H    | 0.077  | 0.015  | 0.348  | -0.015 | 0.044  | -0.045 |
| -0.117 | -0.007 | -0.489 |        |        |        |        |        |
|        | 10.H   | 0.048  | -0.013 | 0.150  | -0.033 | 0.016  | -0.049 |
| -0.012 | 0.022  | 0.389  |        |        |        |        |        |
|        | 11.H   | 0.041  | 0.009  | 0.211  | 0.012  | 0.008  | 0.210  |
| -0.036 | -0.016 | 0.254  |        |        |        |        |        |
|        | 12.C   | 0.005  | -0.002 | -0.214 | 0.012  | -0.047 | -0.027 |
| -0.151 | -0.001 | 0.011  |        |        |        |        |        |
|        | 13.H   | 0.048  | -0.013 | -0.150 | -0.033 | 0.016  | 0.049  |
| 0.012  | -0.022 | 0.389  |        |        |        |        |        |
|        | 14.H   | 0.077  | 0.015  | -0.348 | -0.015 | 0.044  | 0.045  |
| 0.117  | 0.007  | -0.489 |        |        |        |        |        |
|        | 15.H   | 0.041  | 0.009  | -0.211 | 0.012  | 0.008  | -0.210 |
| 0.036  | 0.016  | 0.254  |        |        |        |        |        |

|         |        |        |         |        |        |         |        |
|---------|--------|--------|---------|--------|--------|---------|--------|
|         |        |        | 569.918 |        |        | 573.901 |        |
| 635.982 |        |        |         |        |        |         |        |
|         |        |        | -----   |        |        | -----   |        |
|         | 1.Re   | 0.005  | 0.007   | 0.000  | 0.000  | 0.000   | 0.001  |
| 0.013   | 0.001  | 0.000  |         |        |        |         |        |
|         | 2.O    | 0.016  | 0.015   | 0.000  | 0.000  | 0.000   | 0.026  |
| 0.031   | 0.013  | 0.000  |         |        |        |         |        |
|         | 3.O    | -0.024 | 0.005   | 0.000  | 0.000  | 0.000   | -0.029 |
| 0.022   | -0.009 | 0.000  |         |        |        |         |        |
|         | 4.C    | -0.041 | 0.061   | 0.000  | 0.000  | 0.000   | 0.001  |
| 0.028   | -0.026 | 0.000  |         |        |        |         |        |
|         | 5.H    | -0.140 | -0.039  | 0.008  | 0.013  | -0.004  | 0.009  |
| 0.078   | 0.028  | -0.008 |         |        |        |         |        |
|         | 6.H    | -0.140 | -0.039  | -0.008 | -0.013 | 0.004   | 0.009  |
| 0.078   | 0.028  | 0.008  |         |        |        |         |        |
|         | 7.H    | 0.180  | 0.003   | 0.000  | 0.000  | 0.000   | -0.007 |
| -0.058  | -0.001 | 0.000  |         |        |        |         |        |
|         | 8.C    | -0.003 | -0.129  | -0.011 | 0.003  | -0.138  | -0.003 |
| -0.170  | 0.001  | -0.015 |         |        |        |         |        |
|         | 9.H    | 0.006  | 0.128   | -0.062 | -0.001 | 0.132   | -0.082 |
| 0.070   | 0.011  | 0.437  |         |        |        |         |        |
|         | 10.H   | -0.054 | 0.044   | -0.439 | -0.056 | 0.042   | -0.433 |
| -0.009  | -0.016 | -0.418 |         |        |        |         |        |
|         | 11.H   | 0.059  | 0.039   | 0.469  | 0.053  | 0.034   | 0.510  |
| 0.009   | 0.006  | -0.299 |         |        |        |         |        |
|         | 12.C   | -0.003 | -0.129  | 0.011  | -0.003 | 0.138   | -0.003 |
| -0.170  | 0.001  | 0.015  |         |        |        |         |        |
|         | 13.H   | -0.054 | 0.044   | 0.439  | 0.056  | -0.042  | -0.433 |
| -0.009  | -0.016 | 0.418  |         |        |        |         |        |
|         | 14.H   | 0.006  | 0.128   | 0.062  | 0.001  | -0.132  | -0.082 |
| 0.070   | 0.011  | -0.437 |         |        |        |         |        |
|         | 15.H   | 0.059  | 0.039   | -0.469 | -0.053 | -0.034  | 0.510  |
| 0.009   | 0.006  | 0.299  |         |        |        |         |        |

|         |  |  |         |  |  |         |  |
|---------|--|--|---------|--|--|---------|--|
|         |  |  | 652.998 |  |  | 912.341 |  |
| 914.368 |  |  |         |  |  |         |  |

|         |        |         |        |        |         |        |
|---------|--------|---------|--------|--------|---------|--------|
| 1.Re    | 0.000  | 0.000   | -0.009 | 0.000  | -0.002  | 0.000  |
| 0.000   | 0.000  | -0.001  |        |        |         |        |
| 2.O     | 0.000  | 0.000   | 0.009  | 0.016  | 0.024   | 0.000  |
| 0.000   | 0.000  | -0.009  |        |        |         |        |
| 3.O     | 0.000  | 0.000   | 0.005  | 0.002  | -0.001  | 0.000  |
| 0.000   | 0.000  | -0.009  |        |        |         |        |
| 4.C     | 0.000  | 0.000   | 0.176  | 0.161  | 0.033   | 0.000  |
| 0.000   | 0.000  | -0.005  |        |        |         |        |
| 5.H     | -0.671 | 0.062   | -0.160 | -0.289 | -0.181  | -0.082 |
| 0.018   | 0.012  | 0.000   |        |        |         |        |
| 6.H     | 0.671  | -0.062  | -0.160 | -0.289 | -0.181  | 0.082  |
| -0.018  | -0.012 | 0.000   |        |        |         |        |
| 7.H     | 0.000  | 0.000   | -0.061 | -0.369 | 0.155   | 0.000  |
| 0.000   | 0.000  | -0.013  |        |        |         |        |
| 8.C     | -0.008 | -0.001  | 0.007  | -0.038 | 0.005   | -0.151 |
| 0.042   | -0.002 | 0.193   |        |        |         |        |
| 9.H     | 0.006  | 0.022   | 0.029  | 0.162  | -0.037  | 0.267  |
| -0.204  | 0.026  | -0.311  |        |        |         |        |
| 10.H    | 0.012  | -0.006  | -0.037 | -0.022 | -0.121  | 0.250  |
| 0.022   | 0.169  | -0.362  |        |        |         |        |
| 11.H    | 0.012  | 0.005   | -0.015 | -0.005 | 0.129   | 0.257  |
| -0.019  | -0.178 | -0.360  |        |        |         |        |
| 12.C    | 0.008  | 0.001   | 0.007  | -0.038 | 0.005   | 0.151  |
| -0.042  | 0.002  | 0.193   |        |        |         |        |
| 13.H    | -0.012 | 0.006   | -0.037 | -0.022 | -0.121  | -0.250 |
| -0.022  | -0.169 | -0.362  |        |        |         |        |
| 14.H    | -0.006 | -0.022  | 0.029  | 0.162  | -0.037  | -0.267 |
| 0.204   | -0.026 | -0.311  |        |        |         |        |
| 15.H    | -0.012 | -0.005  | -0.015 | -0.005 | 0.129   | -0.257 |
| 0.019   | 0.178  | -0.360  |        |        |         |        |
|         |        |         |        |        |         |        |
|         |        | 938.663 |        |        | 953.613 |        |
| 989.588 |        |         |        |        |         |        |

|        |        |        |        |        |        |        |
|--------|--------|--------|--------|--------|--------|--------|
| 1.Re   | -0.003 | 0.005  | 0.000  | 0.001  | 0.103  | 0.000  |
| -0.056 | -0.004 | 0.000  |        |        |        |        |
| 2.O    | 0.014  | 0.005  | 0.000  | -0.298 | -0.534 | 0.000  |
| 0.346  | 0.540  | 0.000  |        |        |        |        |
| 3.O    | 0.041  | -0.065 | 0.000  | 0.282  | -0.600 | 0.000  |
| 0.279  | -0.501 | 0.000  |        |        |        |        |
| 4.C    | -0.189 | -0.048 | 0.000  | 0.081  | -0.048 | 0.000  |
| 0.028  | 0.014  | 0.000  |        |        |        |        |
| 5.H    | 0.326  | 0.243  | 0.076  | -0.091 | -0.031 | -0.085 |
| -0.071 | -0.058 | -0.005 |        |        |        |        |
| 6.H    | 0.326  | 0.243  | -0.076 | -0.091 | -0.031 | 0.085  |
| -0.071 | -0.058 | 0.005  |        |        |        |        |
| 7.H    | 0.428  | -0.193 | 0.000  | -0.290 | 0.040  | 0.000  |
| -0.105 | 0.042  | 0.000  |        |        |        |        |
| 8.C    | -0.034 | -0.004 | -0.123 | 0.013  | -0.021 | 0.018  |
| 0.069  | 0.000  | 0.029  |        |        |        |        |
| 9.H    | 0.126  | 0.013  | 0.199  | -0.012 | -0.025 | -0.032 |
| -0.008 | -0.025 | -0.119 |        |        |        |        |
| 10.H   | -0.019 | -0.116 | 0.225  | -0.020 | 0.050  | -0.117 |
| -0.099 | 0.164  | -0.073 |        |        |        |        |
| 11.H   | 0.033  | 0.119  | 0.212  | -0.038 | -0.032 | 0.048  |
| -0.167 | -0.131 | -0.075 |        |        |        |        |
| 12.C   | -0.034 | -0.004 | 0.123  | 0.013  | -0.021 | -0.018 |

Supplementary Material (ESI) for Dalton Transactions  
 This journal is © The Royal Society of Chemistry 2002

|        |        |        |        |        |        |        |        |
|--------|--------|--------|--------|--------|--------|--------|--------|
| 0.069  | 0.000  | -0.029 |        |        |        |        |        |
| 13.H   |        | -0.019 | -0.116 | -0.225 | -0.020 | 0.050  | 0.117  |
| -0.099 | 0.164  | 0.073  |        |        |        |        |        |
| 14.H   |        | 0.126  | 0.013  | -0.199 | -0.012 | -0.025 | 0.032  |
| -0.008 | -0.025 | 0.119  |        |        |        |        |        |
| 15.H   |        | 0.033  | 0.119  | -0.212 | -0.038 | -0.032 | -0.048 |
| -0.167 | -0.131 | 0.075  |        |        |        |        |        |

|          |        |        |          |        |        |          |        |
|----------|--------|--------|----------|--------|--------|----------|--------|
|          |        |        | 1009.140 |        |        | 1013.479 |        |
| 1019.790 |        |        |          |        |        |          |        |
| -----    |        |        |          |        |        |          |        |
| 1.Re     |        | 0.000  | 0.000    | 0.000  | 0.000  | 0.000    | 0.000  |
| -0.003   | 0.002  | 0.000  |          |        |        |          |        |
| 2.O      |        | 0.000  | 0.000    | -0.002 | -0.004 | -0.005   | 0.000  |
| 0.015    | 0.020  | 0.000  |          |        |        |          |        |
| 3.O      |        | 0.000  | 0.000    | 0.002  | 0.000  | -0.002   | 0.000  |
| 0.021    | -0.036 | 0.000  |          |        |        |          |        |
| 4.C      |        | 0.000  | 0.000    | 0.069  | 0.011  | 0.002    | 0.000  |
| -0.013   | 0.045  | 0.000  |          |        |        |          |        |
| 5.H      |        | 0.088  | 0.228    | -0.011 | -0.030 | -0.004   | -0.015 |
| 0.079    | -0.177 | 0.153  |          |        |        |          |        |
| 6.H      |        | -0.088 | -0.228   | -0.011 | -0.030 | -0.004   | 0.015  |
| 0.079    | -0.177 | -0.153 |          |        |        |          |        |
| 7.H      |        | 0.000  | 0.000    | -0.387 | -0.005 | 0.004    | 0.000  |
| -0.097   | 0.061  | 0.000  |          |        |        |          |        |
| 8.C      |        | -0.003 | 0.080    | 0.002  | 0.002  | -0.093   | -0.003 |
| -0.081   | -0.005 | 0.025  |          |        |        |          |        |
| 9.H      |        | -0.088 | -0.432   | -0.025 | 0.099  | 0.507    | 0.020  |
| -0.158   | 0.106  | -0.162 |          |        |        |          |        |
| 10.H     |        | 0.274  | -0.107   | -0.151 | -0.312 | 0.117    | 0.183  |
| 0.255    | -0.285 | 0.039  |          |        |        |          |        |
| 11.H     |        | -0.155 | 0.050    | 0.159  | 0.196  | -0.054   | -0.192 |
| 0.411    | 0.207  | -0.026 |          |        |        |          |        |
| 12.C     |        | 0.003  | -0.080   | 0.002  | 0.002  | -0.093   | 0.003  |
| -0.081   | -0.005 | -0.025 |          |        |        |          |        |
| 13.H     |        | -0.274 | 0.107    | -0.151 | -0.312 | 0.117    | -0.183 |
| 0.255    | -0.285 | -0.039 |          |        |        |          |        |
| 14.H     |        | 0.088  | 0.432    | -0.025 | 0.099  | 0.507    | -0.020 |
| -0.158   | 0.106  | 0.162  |          |        |        |          |        |
| 15.H     |        | 0.155  | -0.050   | 0.159  | 0.196  | -0.054   | 0.192  |
| 0.411    | 0.207  | 0.026  |          |        |        |          |        |

|          |        |        |          |        |        |          |        |
|----------|--------|--------|----------|--------|--------|----------|--------|
|          |        |        | 1021.552 |        |        | 1028.529 |        |
| 1058.098 |        |        |          |        |        |          |        |
| -----    |        |        |          |        |        |          |        |
| 1.Re     |        | 0.000  | 0.000    | 0.000  | 0.000  | 0.000    | 0.000  |
| 0.002    | 0.002  | 0.000  |          |        |        |          |        |
| 2.O      |        | 0.000  | 0.000    | -0.002 | 0.000  | 0.000    | 0.001  |
| -0.010   | -0.018 | 0.000  |          |        |        |          |        |
| 3.O      |        | 0.000  | 0.000    | 0.001  | 0.000  | 0.000    | -0.002 |
| -0.005   | 0.006  | 0.000  |          |        |        |          |        |
| 4.C      |        | 0.000  | 0.000    | -0.046 | 0.000  | 0.000    | 0.100  |
| -0.066   | 0.107  | 0.000  |          |        |        |          |        |
| 5.H      |        | -0.084 | -0.170   | 0.006  | 0.133  | 0.329    | -0.015 |
| 0.267    | -0.409 | 0.409  |          |        |        |          |        |
| 6.H      |        | 0.084  | 0.170    | 0.006  | -0.133 | -0.329   | -0.015 |
| 0.267    | -0.409 | -0.409 |          |        |        |          |        |

Supplementary Material (ESI) for Dalton Transactions  
 This journal is © The Royal Society of Chemistry 2002

|        |        |        |        |        |        |        |
|--------|--------|--------|--------|--------|--------|--------|
| 7.H    | 0.000  | 0.000  | 0.284  | 0.000  | 0.000  | -0.558 |
| -0.151 | 0.125  | 0.000  |        |        |        |        |
| 8.C    | 0.076  | 0.028  | -0.019 | 0.046  | -0.039 | -0.018 |
| 0.027  | -0.002 | -0.014 |        |        |        |        |
| 9.H    | 0.120  | -0.229 | 0.144  | 0.129  | 0.178  | 0.088  |
| 0.067  | -0.025 | 0.077  |        |        |        |        |
| 10.H   | -0.163 | 0.243  | -0.088 | -0.273 | 0.196  | 0.075  |
| -0.111 | 0.107  | -0.004 |        |        |        |        |
| 11.H   | -0.442 | -0.183 | 0.074  | -0.119 | -0.128 | -0.066 |
| -0.157 | -0.075 | 0.020  |        |        |        |        |
| 12.C   | -0.076 | -0.028 | -0.019 | -0.046 | 0.039  | -0.018 |
| 0.027  | -0.002 | 0.014  |        |        |        |        |
| 13.H   | 0.163  | -0.243 | -0.088 | 0.273  | -0.196 | 0.075  |
| -0.111 | 0.107  | 0.004  |        |        |        |        |
| 14.H   | -0.120 | 0.229  | 0.144  | -0.129 | -0.178 | 0.088  |
| 0.067  | -0.025 | -0.077 |        |        |        |        |
| 15.H   | 0.442  | 0.183  | 0.074  | 0.119  | 0.128  | -0.066 |
| -0.157 | -0.075 | -0.020 |        |        |        |        |

|          |        |          |        |          |        |        |
|----------|--------|----------|--------|----------|--------|--------|
|          |        | 2115.346 |        | 2116.567 |        |        |
| 2123.930 |        |          |        |          |        |        |
|          |        | -----    |        | -----    |        |        |
|          |        | -----    |        | -----    |        |        |
| 1.Re     | 0.000  | 0.000    | 0.000  | 0.000    | 0.000  | 0.000  |
| 0.000    | 0.000  | 0.000    |        |          |        |        |
| 2.O      | 0.000  | 0.001    | 0.000  | 0.000    | 0.000  | -0.001 |
| 0.000    | 0.000  | 0.000    |        |          |        |        |
| 3.O      | 0.000  | -0.001   | 0.000  | 0.000    | 0.000  | -0.001 |
| -0.001   | 0.000  | 0.000    |        |          |        |        |
| 4.C      | 0.010  | 0.005    | 0.000  | 0.000    | 0.000  | 0.000  |
| 0.089    | 0.035  | 0.000    |        |          |        |        |
| 5.H      | -0.020 | 0.026    | 0.050  | 0.002    | -0.002 | -0.003 |
| -0.178   | 0.221  | 0.424    |        |          |        |        |
| 6.H      | -0.020 | 0.026    | -0.050 | -0.002   | 0.002  | -0.003 |
| -0.178   | 0.221  | -0.424   |        |          |        |        |
| 7.H      | -0.021 | -0.086   | 0.000  | 0.000    | 0.000  | -0.001 |
| -0.159   | -0.656 | 0.000    |        |          |        |        |
| 8.C      | 0.015  | -0.003   | -0.063 | -0.015   | 0.003  | 0.063  |
| -0.003   | 0.000  | 0.009    |        |          |        |        |
| 9.H      | -0.447 | 0.063    | 0.226  | 0.450    | -0.064 | -0.228 |
| 0.056    | -0.008 | -0.029   |        |          |        |        |
| 10.H     | 0.213  | 0.258    | 0.068  | -0.214   | -0.259 | -0.069 |
| -0.025   | -0.030 | -0.010   |        |          |        |        |
| 11.H     | 0.139  | -0.303   | 0.077  | -0.140   | 0.306  | -0.078 |
| -0.019   | 0.035  | -0.010   |        |          |        |        |
| 12.C     | 0.015  | -0.003   | 0.063  | 0.015    | -0.003 | 0.063  |
| -0.003   | 0.000  | -0.009   |        |          |        |        |
| 13.H     | 0.213  | 0.258    | -0.068 | 0.214    | 0.259  | -0.069 |
| -0.025   | -0.030 | 0.010    |        |          |        |        |
| 14.H     | -0.447 | 0.063    | -0.226 | -0.450   | 0.064  | -0.228 |
| 0.056    | -0.008 | 0.029    |        |          |        |        |
| 15.H     | 0.139  | -0.303   | -0.077 | 0.140    | -0.306 | -0.078 |
| -0.019   | 0.035  | 0.010    |        |          |        |        |

|          |       |          |       |          |       |       |
|----------|-------|----------|-------|----------|-------|-------|
|          |       | 2250.575 |       | 2261.586 |       |       |
| 2265.575 |       |          |       |          |       |       |
|          |       | -----    |       | -----    |       |       |
|          |       | -----    |       | -----    |       |       |
| 1.Re     | 0.000 | 0.000    | 0.000 | 0.000    | 0.000 | 0.000 |

Supplementary Material (ESI) for Dalton Transactions  
 This journal is © The Royal Society of Chemistry 2002

|        |        |        |        |        |        |        |        |
|--------|--------|--------|--------|--------|--------|--------|--------|
| 0.000  | 0.000  | 0.000  |        |        |        |        |        |
|        | 2.O    | 0.000  | -0.001 | 0.000  | 0.000  | 0.000  | 0.000  |
| -0.001 | 0.000  | 0.000  |        |        |        |        |        |
|        | 3.O    | 0.001  | -0.001 | 0.000  | 0.000  | 0.000  | 0.000  |
| -0.001 | 0.000  | 0.000  |        |        |        |        |        |
|        | 4.C    | 0.033  | -0.178 | 0.000  | 0.000  | 0.000  | 0.016  |
| 0.005  | -0.025 | 0.000  |        |        |        |        |        |
|        | 5.H    | -0.179 | 0.196  | 0.401  | 0.019  | -0.024 | -0.047 |
| -0.029 | 0.030  | 0.057  |        |        |        |        |        |
|        | 6.H    | -0.179 | 0.196  | -0.401 | -0.019 | 0.024  | -0.047 |
| -0.029 | 0.030  | -0.057 |        |        |        |        |        |
|        | 7.H    | 0.182  | 0.672  | 0.000  | 0.000  | 0.000  | 0.002  |
| 0.024  | 0.091  | 0.000  |        |        |        |        |        |
|        | 8.C    | -0.018 | 0.008  | 0.000  | -0.129 | 0.022  | 0.005  |
| 0.130  | -0.018 | -0.004 |        |        |        |        |        |
|        | 9.H    | 0.052  | -0.007 | -0.029 | 0.406  | -0.057 | -0.217 |
| -0.405 | 0.058  | 0.212  |        |        |        |        |        |
|        | 10.H   | 0.021  | 0.026  | 0.008  | 0.212  | 0.263  | 0.077  |
| -0.219 | -0.271 | -0.080 |        |        |        |        |        |
|        | 11.H   | 0.029  | -0.063 | 0.017  | 0.150  | -0.336 | 0.095  |
| -0.143 | 0.322  | -0.091 |        |        |        |        |        |
|        | 12.C   | -0.018 | 0.008  | 0.000  | 0.129  | -0.022 | 0.005  |
| 0.130  | -0.018 | 0.004  |        |        |        |        |        |
|        | 13.H   | 0.021  | 0.026  | -0.008 | -0.212 | -0.263 | 0.077  |
| -0.219 | -0.271 | 0.080  |        |        |        |        |        |
|        | 14.H   | 0.052  | -0.007 | 0.029  | -0.406 | 0.057  | -0.217 |
| -0.405 | 0.058  | -0.212 |        |        |        |        |        |
|        | 15.H   | 0.029  | -0.063 | -0.017 | -0.150 | 0.336  | 0.095  |
| -0.143 | 0.322  | 0.091  |        |        |        |        |        |

|          |        |        |          |        |        |          |        |
|----------|--------|--------|----------|--------|--------|----------|--------|
|          |        |        | 2283.234 |        |        | 2298.017 |        |
| 2298.163 |        |        |          |        |        |          |        |
|          |        |        | -----    |        |        | -----    |        |
|          |        |        | -----    |        |        | -----    |        |
|          | 1.Re   | 0.000  | 0.000    | 0.000  | 0.000  | 0.000    | 0.000  |
| 0.000    | 0.000  | 0.000  |          |        |        |          |        |
|          | 2.O    | 0.000  | 0.000    | 0.000  | 0.000  | 0.000    | 0.000  |
| 0.000    | 0.000  | 0.000  |          |        |        |          |        |
|          | 3.O    | 0.000  | 0.000    | 0.000  | 0.000  | 0.000    | 0.000  |
| 0.000    | 0.000  | 0.000  |          |        |        |          |        |
|          | 4.C    | 0.000  | 0.000    | -0.189 | 0.000  | 0.000    | 0.013  |
| -0.001   | 0.005  | 0.000  |          |        |        |          |        |
|          | 5.H    | -0.258 | 0.294    | 0.569  | 0.018  | -0.019   | -0.040 |
| 0.007    | -0.007 | -0.015 |          |        |        |          |        |
|          | 6.H    | 0.258  | -0.294   | 0.569  | -0.018 | 0.019    | -0.040 |
| 0.007    | -0.007 | 0.015  |          |        |        |          |        |
|          | 7.H    | 0.000  | 0.000    | -0.009 | 0.000  | 0.000    | -0.002 |
| -0.008   | -0.027 | 0.000  |          |        |        |          |        |
|          | 8.C    | -0.012 | -0.008   | 0.001  | -0.021 | -0.132   | 0.002  |
| 0.020    | 0.132  | -0.002 |          |        |        |          |        |
|          | 9.H    | 0.038  | -0.006   | -0.019 | 0.010  | -0.004   | -0.005 |
| -0.004   | 0.004  | 0.002  |          |        |        |          |        |
|          | 10.H   | 0.037  | 0.046    | 0.016  | 0.315  | 0.373    | 0.114  |
| -0.311   | -0.368 | -0.112 |          |        |        |          |        |
|          | 11.H   | -0.001 | 0.003    | 0.001  | -0.197 | 0.418    | -0.121 |
| 0.200    | -0.426 | 0.124  |          |        |        |          |        |
|          | 12.C   | 0.012  | 0.008    | 0.001  | 0.021  | 0.132    | 0.002  |
| 0.020    | 0.132  | 0.002  |          |        |        |          |        |
|          | 13.H   | -0.037 | -0.046   | 0.016  | -0.315 | -0.373   | 0.114  |
| -0.311   | -0.368 | 0.112  |          |        |        |          |        |

Supplementary Material (ESI) for Dalton Transactions  
 This journal is © The Royal Society of Chemistry 2002

```

    14.H      -0.038   0.006  -0.019      -0.010   0.004  -0.005
-0.004  0.004  -0.002
    15.H      0.001  -0.003   0.001      0.197  -0.418  -0.121
0.200  -0.426  -0.124
    
```

List of All Frequencies:

Intensities

=====

| Intensity (degeneracy not counted) | Frequency<br>cm-1 | Dipole Strength<br>1e-40 esu2 cm2 | Absorption<br>km/mole |
|------------------------------------|-------------------|-----------------------------------|-----------------------|
|                                    | 67.125645         | 54.113894                         | 0.910490              |
|                                    | 88.533785         | 4.220458                          | 0.093658              |
|                                    | 178.649087        | 1.980847                          | 0.088701              |
|                                    | 181.920898        | 4.662707                          | 0.212617              |
|                                    | 203.824854        | 210.915290                        | 10.775645             |
|                                    | 205.887794        | 17.216713                         | 0.888503              |
|                                    | 234.738377        | 2.763278                          | 0.162587              |
|                                    | 235.611008        | 22.631725                         | 1.336569              |
|                                    | 285.153605        | 2.331025                          | 0.166611              |
|                                    | 338.038589        | 5.409358                          | 0.458342              |
|                                    | 420.975956        | 0.428968                          | 0.045265              |
|                                    | 467.500751        | 133.788910                        | 15.677633             |
|                                    | 469.264638        | 35.497168                         | 4.175318              |
|                                    | 564.052157        | 9.174046                          | 1.297055              |
|                                    | 565.513050        | 133.009998                        | 18.854065             |
|                                    | 569.917923        | 4.369843                          | 0.624247              |
|                                    | 573.901212        | 1.482407                          | 0.213247              |
|                                    | 635.982445        | 19.273592                         | 3.072457              |
|                                    | 652.997503        | 0.003857                          | 0.000631              |
|                                    | 912.341150        | 8.470349                          | 1.937031              |
|                                    | 914.368289        | 0.629933                          | 0.144375              |
|                                    | 938.663222        | 23.678478                         | 5.571109              |
|                                    | 953.612776        | 564.871749                        | 135.020585            |
|                                    | 989.587762        | 218.313447                        | 54.151797             |
|                                    | 1009.140348       | 1.490264                          | 0.376958              |
|                                    | 1013.478916       | 39.992018                         | 10.159354             |
|                                    | 1019.790325       | 4.615220                          | 1.179727              |
|                                    | 1021.551598       | 0.131161                          | 0.033585              |
|                                    | 1028.528589       | 5.622367                          | 1.449485              |
|                                    | 1058.097727       | 5.312839                          | 1.409063              |
|                                    | 2115.345698       | 2.643901                          | 1.401860              |
|                                    | 2116.566541       | 0.799755                          | 0.424294              |
|                                    | 2123.929731       | 8.604762                          | 4.580966              |
|                                    | 2250.575418       | 7.662042                          | 4.322313              |
|                                    | 2261.585646       | 2.758495                          | 1.563736              |
|                                    | 2265.574683       | 14.226045                         | 8.078684              |
|                                    | 2283.233822       | 15.475479                         | 8.856713              |
|                                    | 2298.016614       | 0.023049                          | 0.013277              |
|                                    | 2298.162813       | 2.676230                          | 1.541638              |

=====

Supplementary Material (ESI) for Dalton Transactions  
This journal is © The Royal Society of Chemistry 2002

Statistical Thermal Analysis \*\*\* ideal gas assumed \*\*\*  
=====

Pressure: 1.000000 atm.  
Temperature: 298.150000 K

Moments of Inertia (and direction vectors)  
=====

|       | 774.8990 | 915.4089 | 1105.7316 |
|-------|----------|----------|-----------|
| ----- | -----    | -----    | -----     |
|       | 0.0000   | 1.0000   | -0.0046   |
|       | 0.0000   | 0.0046   | 1.0000    |
|       | 1.0000   | 0.0000   | 0.0000    |

|        | Temp  |        |       |  |
|--------|-------|--------|-------|--|
| Transl | Rotat | Vibrat | Total |  |
| -----  | ----- | -----  | ----- |  |

|        |                                             |        |         |
|--------|---------------------------------------------|--------|---------|
| 298.15 | Entropy (cal/mole-K):                       |        |         |
| 42.711 | 28.152                                      | 29.429 | 100.293 |
|        | Internal Energy (Kcal/mole):                |        |         |
| 0.889  | 0.889                                       | 59.003 | 60.780  |
|        | Constant Volume Heat Capacity (cal/mole-K): |        |         |
| 2.981  | 2.981                                       | 32.929 | 38.890  |

\*\*\*\*\*
