# Supplementary material for: Vibrational properties and matrix photochemistry of trimethyldioxorhenium(vii), (CH3)3ReO2Electronic supplementary information (ESI) available: further details concerning the vibrational calculations and cartesion coordinates of the optimised geometries. See http://www.rsc.org/suppdata/dt/b2/b204238j/
Source: Royal Society of Chemistry journal article supplement (doi:10.1039/b204238j), 2002-08-07
Supplement: b204238j-5.pdf [file b204238j-5.pdf]

ReOODCD22

\*\*\*\*\*  
\* F R E Q U E N C I E S \*  
\*\*\*\*\*

Coordinates (Cartesian)

```
=====
```

| Atom      | bohr                |                       |           |           |  |
|-----------|---------------------|-----------------------|-----------|-----------|--|
| angstrom  | Geometric Variables |                       |           |           |  |
|           | X                   | Y                     | Z         | X         |  |
| Y         | Z                   | (0:frozen, *:LT par.) |           |           |  |
| 1 Re      | 0.000685            | 0.004060              | 0.001991  | 0.000363  |  |
| 0.002149  | 0.001054            | 1                     | 2         | 3         |  |
| 2 O       | 3.670565            | -0.017357             | -0.006963 | 1.942379  |  |
| -0.009185 | -0.003684           | 4                     | 5         | 6         |  |
| 3 H       | 4.342721            | 1.699618              | -0.049972 | 2.298068  |  |
| 0.899399  | -0.026444           | 7                     | 8         | 9         |  |
| 4 O       | -1.296761           | 0.113959              | -2.956352 | -0.686216 |  |
| 0.060304  | -1.564433           | 10                    | 11        | 12        |  |
| 5 C       | -0.782126           | -3.012068             | 1.751271  | -0.413883 |  |
| -1.593917 | 0.926732            | 13                    | 14        | 15        |  |
| 6 H       | -0.363896           | -3.243920             | 3.768913  | -0.192566 |  |
| -1.716608 | 1.994422            | 16                    | 17        | 18        |  |
| 7 H       | -1.731970           | -4.613817             | 0.848562  | -0.916519 |  |
| -2.441526 | 0.449040            | 19                    | 20        | 21        |  |
| 8 C       | -0.975917           | 2.804055              | 2.006299  | -0.516433 |  |
| 1.483841  | 1.061687            | 22                    | 23        | 24        |  |
| 9 H       | -1.917489           | 4.447000              | 1.167074  | -1.014691 |  |
| 2.353251  | 0.617589            | 25                    | 26        | 27        |  |
| 10 H      | -0.739884           | 2.885117              | 4.063941  | -0.391530 |  |
| 1.526738  | 2.150544            | 28                    | 29        | 30        |  |

```
-----
```

Atomic Masses:

```
-----
```

|       |              |
|-------|--------------|
| 1. Re | 186.95575000 |
| 2. O  | 15.99491400  |
| 3. H  | 2.00000000   |
| 4. O  | 15.99491400  |
| 5. C  | 12.00000000  |
| 6. H  | 2.00000000   |
| 7. H  | 2.00000000   |
| 8. C  | 12.00000000  |
| 9. H  | 2.00000000   |
| 10. H | 2.00000000   |

```
=====
```



0.129 -0.002 -0.055

| 9      |        |        | 7      |        |        | 8      |       |  |
|--------|--------|--------|--------|--------|--------|--------|-------|--|
| 1.Re   | 0.000  | 0.000  | 0.000  | 0.000  | 0.000  | 0.000  | 0.000 |  |
| 0.000  | 0.000  | 0.000  |        |        |        |        |       |  |
| 2.O    | 0.000  | 0.000  | 0.000  | 0.000  | 0.000  | 0.000  | 0.000 |  |
| 0.000  | 0.000  | 0.000  |        |        |        |        |       |  |
| 3.H    | -0.231 | 0.010  | -0.472 | -0.005 | -0.113 | -0.047 |       |  |
| 0.049  | -0.005 | 0.027  |        |        |        |        |       |  |
| 4.O    | 0.105  | 0.002  | 0.041  | 0.000  | 0.156  | -0.004 |       |  |
| 0.000  | 0.000  | 0.201  |        |        |        |        |       |  |
| 5.C    | -0.057 | -0.001 | -0.010 | 0.017  | -0.079 | 0.105  |       |  |
| 0.003  | 0.000  | -0.093 |        |        |        |        |       |  |
| 6.H    | 0.127  | -0.002 | -0.048 | 0.014  | -0.008 | 0.113  |       |  |
| -0.047 | 0.003  | -0.082 |        |        |        |        |       |  |
| 7.H    | -0.137 | -0.002 | 0.076  | 0.028  | -0.116 | 0.158  |       |  |
| 0.025  | -0.001 | -0.114 |        |        |        |        |       |  |
| 8.C    | -0.045 | -0.002 | 0.014  | -0.016 | -0.072 | -0.095 |       |  |
| -0.002 | 0.000  | -0.107 |        |        |        |        |       |  |
| 9.H    | -0.125 | -0.003 | 0.101  | -0.023 | -0.106 | -0.154 |       |  |
| 0.020  | -0.001 | -0.133 |        |        |        |        |       |  |
| 10.H   | 0.142  | -0.003 | -0.008 | -0.020 | 0.000  | -0.098 |       |  |
| -0.053 | 0.003  | -0.101 |        |        |        |        |       |  |

| 12     |        |        | 10     |        |        | 11     |       |  |
|--------|--------|--------|--------|--------|--------|--------|-------|--|
| 1.Re   | 0.000  | 0.000  | 0.000  | 0.000  | 0.000  | 0.000  | 0.000 |  |
| 0.000  | 0.000  | 0.000  |        |        |        |        |       |  |
| 2.O    | 0.000  | 0.000  | 0.000  | 0.000  | 0.000  | 0.000  | 0.000 |  |
| 0.000  | 0.000  | 0.000  |        |        |        |        |       |  |
| 3.H    | 0.646  | 0.038  | -0.180 | 0.000  | 0.629  | 0.008  |       |  |
| 0.000  | 0.000  | 0.373  |        |        |        |        |       |  |
| 4.O    | 0.000  | 0.000  | 0.000  | 0.000  | 0.000  | 0.000  |       |  |
| 0.000  | 0.000  | 0.000  |        |        |        |        |       |  |
| 5.C    | -0.029 | -0.001 | 0.004  | -0.059 | -0.045 | 0.023  |       |  |
| -0.028 | -0.001 | -0.026 |        |        |        |        |       |  |
| 6.H    | 0.046  | 0.001  | -0.012 | -0.072 | -0.038 | 0.027  |       |  |
| 0.326  | 0.020  | -0.097 |        |        |        |        |       |  |
| 7.H    | -0.050 | -0.008 | 0.037  | -0.088 | -0.033 | 0.032  |       |  |
| -0.175 | -0.016 | 0.154  |        |        |        |        |       |  |
| 8.C    | -0.063 | -0.002 | 0.013  | 0.060  | -0.039 | -0.024 |       |  |
| -0.023 | 0.000  | -0.047 |        |        |        |        |       |  |
| 9.H    | -0.105 | -0.009 | 0.048  | 0.098  | -0.026 | -0.041 |       |  |
| -0.180 | -0.015 | 0.102  |        |        |        |        |       |  |
| 10.H   | 0.011  | -0.002 | 0.005  | 0.053  | -0.028 | -0.023 |       |  |
| 0.336  | 0.021  | -0.089 |        |        |        |        |       |  |

| 15    |       |       | 13    |       |       | 14    |       |  |
|-------|-------|-------|-------|-------|-------|-------|-------|--|
| 1.Re  | 0.000 | 0.000 | 0.000 | 0.000 | 0.000 | 0.000 | 0.000 |  |
| 0.000 | 0.000 | 0.000 |       |       |       |       |       |  |





Supplementary Material (ESI) for Dalton Transactions  
This journal is © The Royal Society of Chemistry 2002

|             |             |             |             |             |             |
|-------------|-------------|-------------|-------------|-------------|-------------|
| 8           | -0.16875125 | 0.08576777  | 0.08321295  | -0.50188635 | 0.09527095  |
| 0.55344641  | 0.22282176  | -0.03095482 |             |             |             |
| 9           | 0.00083900  | -0.01348482 | 0.45965352  | 0.06456220  | -0.28382813 |
| 0.06377127  | 0.05733984  | 0.24027098  |             |             |             |
| 10          | 0.09881280  | 0.21721316  | -0.09067276 | -0.17508307 | -0.18701696 |
| 0.00429583  | -0.18631752 | -0.06929879 |             |             |             |
| 11          | -0.17499022 | -0.00162470 | 0.00597843  | 0.37118355  | 0.16412443  |
| 0.19054549  | -0.02932649 | 0.02498962  |             |             |             |
| 12          | -0.28385060 | -0.29121466 | -0.11827638 | 0.04783265  | -0.06869489 |
| -0.12331922 | 0.33892260  | -0.51826783 |             |             |             |
| 13          | -0.47037997 | -0.01804697 | 0.22921649  | -0.20543129 | 0.06580945  |
| -0.31598075 | -0.32123974 | 0.05747974  |             |             |             |
| 14          | -0.09248019 | 0.07295789  | -0.33651332 | -0.13377882 | 0.09432561  |
| 0.05154430  | 0.03303496  | 0.33164267  |             |             |             |
| 15          | 0.15194665  | 0.01026791  | -0.09458750 | 0.07247815  | -0.02081128 |
| 0.09255183  | 0.09779705  | -0.00962343 |             |             |             |
| 16          | 0.34270050  | -0.06243538 | -0.09555371 | 0.05518271  | 0.13022239  |
| 0.10817778  | 0.26688955  | 0.30558321  |             |             |             |
| 17          | -0.06579431 | 0.07707736  | -0.03250750 | 0.07324087  | -0.16272114 |
| -0.01130305 | -0.07671974 | -0.27059415 |             |             |             |
| 18          | -0.37758106 | 0.03639217  | -0.08076551 | -0.21808166 | 0.10128765  |
| -0.12842544 | -0.19644025 | 0.18790846  |             |             |             |
| 19          | -0.03514003 | -0.04049770 | 0.00575186  | -0.02334417 | 0.14862744  |
| -0.05119568 | -0.10020831 | 0.25402037  |             |             |             |
| 20          | -0.00011266 | -0.05857047 | -0.00105272 | 0.00358689  | 0.14537558  |
| -0.08874572 | -0.08153737 | 0.22872323  |             |             |             |
| 21          | 0.00473506  | 0.01948722  | -0.15634510 | 0.02887364  | 0.01941240  |
| -0.07605262 | -0.00784486 | 0.07168024  |             |             |             |
| 22          | 0.00102798  | 0.01718031  | -0.10210018 | 0.01454812  | 0.01467417  |
| -0.02865555 | -0.00446116 | 0.06467616  |             |             |             |
| 23          | 0.01511232  | -0.06522881 | 0.33089084  | -0.03263922 | -0.03572339 |
| 0.08356011  | 0.01682674  | -0.20580626 |             |             |             |
| 24          | 0.09906892  | -0.16016677 | 0.34973534  | 0.01689275  | 0.08580398  |
| -0.01356117 | -0.00553154 | -0.03864811 |             |             |             |

|          | 9        | 10       | 11       | 12       | 13       |
|----------|----------|----------|----------|----------|----------|
| 14       | 15       | 16       |          |          |          |
|          | 474.9881 | 504.7805 | 584.0024 | 609.9796 | 630.3503 |
| 661.8129 | 689.6827 | 696.1466 |          |          |          |

|             |             |             |             |             |             |
|-------------|-------------|-------------|-------------|-------------|-------------|
| 1           | -0.01327123 | 0.09711039  | 0.14082557  | 0.48201839  | 0.33138555  |
| -0.16834672 | -0.20185857 | -0.01562410 |             |             |             |
| 2           | -0.15514959 | -0.02587351 | -0.07149355 | 0.02564331  | 0.02316953  |
| -0.19957652 | 0.08257842  | 0.61643738  |             |             |             |
| 3           | -0.02582655 | 0.22997317  | -0.00571165 | 0.00155627  | 0.03223333  |
| 0.03538097  | 0.41821227  | -0.02758752 |             |             |             |
| 4           | -0.02319247 | 0.12403635  | -0.05831054 | -0.50596388 | -0.22682404 |
| 0.54610971  | -0.12828832 | 0.23409808  |             |             |             |
| 5           | -0.10319206 | -0.01043182 | -0.10058522 | -0.22686660 | 0.06486112  |
| -0.42615375 | 0.05372582  | 0.13818729  |             |             |             |
| 6           | -0.00841677 | 0.08883085  | 0.05833318  | 0.01257410  | 0.03243508  |
| 0.01461675  | 0.20586752  | -0.00657072 |             |             |             |
| 7           | -0.07847707 | 0.26628475  | 0.14622500  | 0.09184971  | 0.12709136  |
| 0.23398070  | -0.03625346 | 0.12361085  |             |             |             |
| 8           | 0.15675110  | -0.02519521 | -0.06474859 | -0.06171455 | 0.02432464  |
| -0.26115027 | 0.06196956  | 0.41884748  |             |             |             |
| 9           | 0.00233671  | 0.23883607  | -0.01300865 | 0.02232088  | -0.00212897 |
| -0.03933603 | 0.28267170  | -0.03900212 |             |             |             |
| 10          | 0.01150325  | 0.14612647  | -0.23452465 | -0.54632252 | 0.13408819  |

Supplementary Material (ESI) for Dalton Transactions  
This journal is © The Royal Society of Chemistry 2002

-0.43935335 -0.06574750 -0.31589976  
11 -0.05298503 -0.02595402 0.04664813 0.02785968 -0.04761475  
0.04827786 0.03866533 0.36985381  
12 -0.07378522 0.52678289 -0.02691760 -0.09001898 0.30231709  
0.09563589 0.13514353 0.04095790  
13 0.10536254 -0.12708631 0.40994414 -0.18352405 0.23947912  
0.05890926 0.01208565 -0.00077708  
14 -0.48765217 0.19443331 -0.08666745 0.12375201 -0.08095611  
0.06389535 0.31417686 -0.22166750  
15 0.02571549 0.05394652 -0.13552005 0.06691460 -0.07772070  
-0.00102135 0.03496632 -0.02937792  
16 -0.07335678 0.04834833 0.42076338 -0.22028294 0.42052982  
0.02209215 -0.09900414 0.01645413  
17 0.26039392 -0.22065251 -0.21571308 0.08058303 -0.10621548  
0.08359156 0.29454173 -0.09584075  
18 -0.29405293 0.20062052 -0.07026076 0.09121505 -0.19012157  
-0.11164427 -0.07424983 0.13010300  
19 0.15981672 -0.00822954 -0.54035106 0.06923190 0.47553417  
0.22318989 -0.06418039 0.07686011  
20 0.30909746 0.24865920 -0.28825052 0.09563626 0.12375795  
0.08516696 -0.23347302 0.00866572  
21 0.31281659 0.26253195 0.20701537 0.03871902 -0.26193873  
-0.06699843 -0.15913292 -0.12509648  
22 0.16752895 0.09228804 0.05516703 0.00791093 -0.04469178  
-0.03437337 0.08008327 0.02849870  
23 -0.51749889 -0.24958627 -0.17219324 -0.01745875 0.11130205  
0.10884295 -0.34250704 -0.12025555  
24 -0.02609024 0.36843482 -0.03741133 0.08163102 -0.29128112  
-0.13942719 -0.44367254 0.03570007

17 18 19 20 21  
22 23 24  
983.1411 1023.9865 1031.1573 2182.3215 2186.6274  
2309.4758 2315.5641 2679.5966  
-----

1 -0.22034817 0.00829664 0.05100380 -0.00155390 0.00609885  
0.00060803 0.00130237 -0.00238024  
2 0.02211615 0.20772961 -0.03636148 0.01694303 0.00264947  
-0.00116454 0.00163499 0.00145910  
3 -0.51235242 -0.02489407 -0.15695818 0.00175443 -0.01062925  
0.00180423 0.00177974 0.00056453  
4 -0.13861462 0.01310635 0.03566451 -0.00047927 0.00541314  
0.00054898 0.00055813 0.14924645  
5 0.01162140 0.10963958 -0.02049310 0.00895992 0.00055596  
-0.00208971 0.00175310 0.45354139  
6 -0.29933284 -0.01063902 -0.08768357 0.00179764 -0.00632971  
0.00054156 0.00141504 -0.00325511  
7 0.28541551 0.00052856 0.01906791 0.00025519 -0.00046714  
-0.00159908 -0.00179620 0.09061723  
8 -0.02812286 0.18934619 -0.03295664 0.01785316 0.00269363  
0.00127866 0.00013053 0.14155339  
9 0.69962275 -0.01910338 -0.08681956 0.00240870 -0.01492182  
0.00018900 -0.00139671 -0.02068180  
10 -0.01735093 -0.01581503 0.02891410 -0.00179323 0.00302224  
-0.00111400 0.00021130 -0.37173364  
11 -0.00080773 0.10950702 -0.01985997 0.00862928 0.00340609  
-0.00078768 0.00135345 -0.77784349  
12 -0.02675251 0.00118933 -0.04311979 0.00111819 -0.00387225  
-0.00091617 -0.00206646 0.00977215

Supplementary Material (ESI) for Dalton Transactions  
This journal is © The Royal Society of Chemistry 2002

13 0.01520280 0.29509398 0.18797617 -0.12051385 -0.14901781  
-0.02567093 0.15169233 -0.00063915  
14 -0.01134034 0.45610942 0.23945785 0.04722854 0.05305282  
0.01292145 -0.06872302 0.00000377  
15 -0.00814723 0.06940253 0.03804590 -0.46462646 -0.57279698  
-0.11559543 0.58799805 -0.00059440  
16 0.01477436 -0.03660246 -0.03022982 0.18522979 0.23802543  
-0.08376056 0.38995503 0.00108687  
17 0.02049897 0.20603794 0.06456341 0.32313944 0.40301431  
-0.10690836 0.51822661 0.00046870  
18 -0.00920623 -0.48847136 -0.29177230 0.09113783 0.11794190  
-0.07256447 0.37289371 -0.00025548  
19 0.02311969 -0.01605049 -0.00206019 -0.29739504 0.23331947  
0.37794407 0.04892188 0.00040761  
20 -0.01235647 0.17665782 -0.07780651 0.43359633 -0.28271820  
-0.51689916 -0.09636353 -0.00098238  
21 -0.00210216 0.41297299 -0.59238793 -0.17580148 0.16885465  
0.23755725 0.02070768 -0.00039622  
22 -0.00819494 -0.09192805 0.12997925 0.51314815 -0.40874732  
0.68112553 0.11829229 -0.00138537  
23 0.01432408 0.29638269 -0.35512539 0.21849227 -0.14597878  
0.14443939 0.11802685 0.00037525  
24 -0.06817425 0.12148733 0.51541923 -0.03372499 0.24927779  
0.10406441 0.16369378 0.00171834

Intensities  
=====

| Intensity (degeneracy not counted) | Frequency<br>cm-1 | Dipole Strength<br>1e-40 esu2 cm2 | Absorption<br>km/mole |
|------------------------------------|-------------------|-----------------------------------|-----------------------|
|                                    | -----             | -----                             | -----                 |
|                                    | 164.577311        | 162.265910                        | 6.693840              |
|                                    | 196.443803        | 27.540941                         | 1.356111              |
|                                    | 207.327610        | 43.780685                         | 2.275191              |
|                                    | 211.746625        | 79.436646                         | 4.216144              |
|                                    | 223.412683        | 39.400367                         | 2.206410              |
|                                    | 265.781713        | 148.688893                        | 9.905621              |
|                                    | 336.369707        | 386.792538                        | 32.611670             |
|                                    | 423.005069        | 10.044468                         | 1.065002              |
|                                    | 474.988109        | 10.776204                         | 1.283000              |
|                                    | 504.780522        | 16.790970                         | 2.124499              |
|                                    | 584.002434        | 68.218422                         | 9.986065              |
|                                    | 609.979622        | 51.771311                         | 7.915577              |
|                                    | 630.350347        | 705.660739                        | 111.495162            |
|                                    | 661.812903        | 408.050741                        | 67.690461             |
|                                    | 689.682674        | 33.819982                         | 5.846565              |
|                                    | 696.146593        | 147.940366                        | 25.814604             |
|                                    | 983.141109        | 444.860559                        | 109.627076            |
|                                    | 1023.986469       | 49.088791                         | 12.599538             |
|                                    | 1031.157288       | 48.179317                         | 12.452703             |
|                                    | 2182.321496       | 8.408087                          | 4.599324              |
|                                    | 2186.627404       | 6.288886                          | 3.446883              |
|                                    | 2309.475809       | 0.249693                          | 0.144543              |
|                                    | 2315.564141       | 0.544441                          | 0.315999              |
|                                    | 2679.596624       | 80.880678                         | 54.324067             |

Zero-Point Energy : 0.049191 a.u.



=====  
 1.338551 eV

=====  
 Vibrations and Normal Modes \*\*\* (cartesian coordinates, NOT  
 mass-weighted) \*\*\*  
 =====

The headers on the normal mode eigenvectors below give the Frequency in cm-1  
 (a negative value means an imaginary frequency, no output for  
 (almost-)zero frequencies)

|               | 164.577 |        |        | 196.444 |        |        |
|---------------|---------|--------|--------|---------|--------|--------|
| 207.328       | -----   |        |        | -----   |        |        |
| 1.Re          | -0.010  | 0.021  | 0.011  | -0.031  | 0.002  | -0.029 |
| -0.001 -0.006 | 0.034   |        |        |         |        |        |
| 2.O           | -0.008  | -0.104 | 0.013  | -0.024  | -0.009 | 0.325  |
| -0.005 0.007  | -0.076  |        |        |         |        |        |
| 3.H           | 0.028   | -0.126 | -0.459 | -0.042  | 0.000  | 0.451  |
| -0.006 0.008  | -0.023  |        |        |         |        |        |
| 4.O           | 0.064   | -0.095 | -0.024 | -0.116  | -0.036 | 0.001  |
| -0.019 0.047  | 0.049   |        |        |         |        |        |
| 5.C           | 0.069   | -0.036 | -0.036 | 0.213   | -0.064 | -0.033 |
| 0.031 -0.120  | -0.146  |        |        |         |        |        |
| 6.H           | -0.379  | -0.120 | 0.043  | 0.407   | -0.103 | -0.078 |
| 0.084 -0.396  | -0.190  |        |        |         |        |        |
| 7.H           | 0.438   | -0.085 | -0.346 | 0.246   | -0.100 | -0.004 |
| 0.026 -0.006  | -0.351  |        |        |         |        |        |
| 8.C           | -0.019  | 0.025  | -0.012 | 0.233   | 0.084  | -0.015 |
| 0.010 0.132   | -0.149  |        |        |         |        |        |
| 9.H           | -0.275  | -0.031 | 0.174  | 0.235   | 0.113  | 0.040  |
| 0.162 0.035   | -0.526  |        |        |         |        |        |
| 10.H          | 0.387   | 0.021  | -0.054 | 0.468   | 0.129  | -0.044 |
| -0.220 0.464  | -0.140  |        |        |         |        |        |
|               | 211.747 |        |        | 223.413 |        |        |
| 265.782       | -----   |        |        | -----   |        |        |
| 1.Re          | 0.010   | -0.009 | 0.003  | -0.051  | -0.024 | 0.020  |
| -0.010 0.041  | 0.009   |        |        |         |        |        |
| 2.O           | 0.014   | 0.237  | -0.027 | -0.062  | 0.134  | -0.147 |
| -0.017 -0.139 | -0.132  |        |        |         |        |        |
| 3.H           | -0.162  | 0.311  | 0.216  | -0.206  | 0.191  | -0.111 |
| 0.142 -0.190  | 0.510   |        |        |         |        |        |
| 4.O           | -0.045  | -0.189 | 0.022  | 0.370   | 0.092  | -0.162 |
| 0.080 -0.308  | -0.044  |        |        |         |        |        |
| 5.C           | -0.193  | 0.005  | -0.051 | 0.044   | -0.040 | 0.043  |
| 0.040 0.005   | -0.086  |        |        |         |        |        |
| 6.H           | -0.477  | -0.243 | -0.028 | 0.136   | 0.167  | 0.053  |
| 0.388 -0.152  | -0.178  |        |        |         |        |        |
| 7.H           | -0.249  | 0.189  | -0.332 | 0.258   | -0.249 | 0.194  |
| -0.030 0.061  | -0.107  |        |        |         |        |        |
| 8.C           | 0.144   | 0.027  | 0.012  | 0.177   | 0.052  | 0.020  |
| -0.017 0.007  | 0.099   |        |        |         |        |        |
| 9.H           | 0.096   | 0.079  | 0.174  | 0.549   | 0.288  | 0.067  |

Supplementary Material (ESI) for Dalton Transactions  
 This journal is © The Royal Society of Chemistry 2002

|        |        |       |       |        |        |  |       |        |       |
|--------|--------|-------|-------|--------|--------|--|-------|--------|-------|
| 0.208  | 0.162  | 0.146 |       |        |        |  |       |        |       |
|        | 10.H   |       | 0.358 | -0.061 | -0.003 |  | 0.205 | -0.057 | 0.023 |
| -0.374 | -0.217 | 0.151 |       |        |        |  |       |        |       |

|         |        |        |         |        |        |  |         |        |        |
|---------|--------|--------|---------|--------|--------|--|---------|--------|--------|
|         |        |        | 336.370 |        |        |  | 423.005 |        |        |
| 474.988 |        |        |         |        |        |  |         |        |        |
| -----   |        |        |         |        |        |  |         |        |        |
|         | 1.Re   |        | 0.000   | 0.003  | -0.001 |  | 0.004   | 0.000  | 0.001  |
| 0.001   | 0.010  | 0.002  |         |        |        |  |         |        |        |
|         | 2.O    |        | -0.008  | 0.039  | 0.126  |  | 0.044   | 0.011  | 0.020  |
| 0.006   | 0.004  | -0.002 |         |        |        |  |         |        |        |
|         | 3.H    |        | -0.002  | 0.018  | -0.795 |  | 0.052   | 0.005  | -0.037 |
| -0.039  | 0.023  | -0.010 |         |        |        |  |         |        |        |
|         | 4.O    |        | 0.004   | -0.075 | -0.007 |  | -0.106  | -0.010 | 0.043  |
| 0.007   | -0.079 | 0.000  |         |        |        |  |         |        |        |
|         | 5.C    |        | -0.019  | -0.008 | -0.060 |  | -0.029  | 0.011  | -0.051 |
| -0.069  | -0.060 | -0.174 |         |        |        |  |         |        |        |
|         | 6.H    |        | 0.271   | -0.084 | -0.129 |  | -0.319  | 0.319  | 0.046  |
| -0.067  | 0.519  | -0.103 |         |        |        |  |         |        |        |
|         | 7.H    |        | -0.314  | 0.114  | 0.036  |  | 0.464   | -0.268 | -0.066 |
| -0.013  | -0.333 | 0.265  |         |        |        |  |         |        |        |
|         | 8.C    |        | 0.014   | -0.009 | 0.054  |  | -0.008  | -0.014 | -0.030 |
| 0.061   | -0.052 | 0.147  |         |        |        |  |         |        |        |
|         | 9.H    |        | 0.258   | 0.111  | 0.011  |  | 0.487   | 0.257  | -0.049 |
| -0.103  | -0.337 | -0.245 |         |        |        |  |         |        |        |
|         | 10.H   |        | -0.187  | -0.080 | 0.079  |  | -0.319  | -0.267 | 0.015  |
| 0.088   | 0.503  | 0.119  |         |        |        |  |         |        |        |

|         |        |        |         |        |        |  |         |        |        |
|---------|--------|--------|---------|--------|--------|--|---------|--------|--------|
|         |        |        | 504.781 |        |        |  | 584.002 |        |        |
| 609.980 |        |        |         |        |        |  |         |        |        |
| -----   |        |        |         |        |        |  |         |        |        |
|         | 1.Re   |        | -0.006  | 0.002  | -0.015 |  | -0.009  | 0.005  | 0.000  |
| -0.036  | -0.002 | 0.000  |         |        |        |  |         |        |        |
|         | 2.O    |        | -0.030  | -0.001 | 0.016  |  | 0.047   | 0.017  | -0.016 |
| 0.325   | 0.082  | -0.001 |         |        |        |  |         |        |        |
|         | 3.H    |        | -0.043  | 0.003  | -0.014 |  | 0.345   | -0.100 | 0.081  |
| 0.808   | -0.106 | -0.042 |         |        |        |  |         |        |        |
|         | 4.O    |        | 0.002   | -0.001 | -0.055 |  | 0.006   | -0.006 | -0.004 |
| 0.019   | 0.003  | -0.017 |         |        |        |  |         |        |        |
|         | 5.C    |        | 0.067   | 0.119  | 0.164  |  | 0.196   | -0.095 | -0.030 |
| -0.136  | 0.029  | 0.054  |         |        |        |  |         |        |        |
|         | 6.H    |        | -0.225  | -0.266 | 0.175  |  | -0.379  | 0.098  | 0.115  |
| 0.270   | -0.193 | -0.055 |         |        |        |  |         |        |        |
|         | 7.H    |        | 0.214   | 0.288  | -0.298 |  | -0.441  | 0.191  | 0.128  |
| 0.186   | -0.118 | -0.031 |         |        |        |  |         |        |        |
|         | 8.C    |        | 0.076   | -0.149 | 0.179  |  | -0.174  | -0.083 | 0.017  |
| 0.028   | -0.030 | 0.004  |         |        |        |  |         |        |        |
|         | 9.H    |        | 0.282   | -0.309 | -0.375 |  | 0.410   | 0.211  | -0.064 |
| -0.078  | -0.121 | -0.050 |         |        |        |  |         |        |        |
|         | 10.H   |        | -0.254  | 0.319  | 0.193  |  | 0.344   | 0.155  | -0.053 |
| 0.093   | 0.045  | -0.007 |         |        |        |  |         |        |        |

|         |  |  |         |  |  |  |         |  |  |
|---------|--|--|---------|--|--|--|---------|--|--|
|         |  |  | 630.350 |  |  |  | 661.813 |  |  |
| 689.683 |  |  |         |  |  |  |         |  |  |
| -----   |  |  |         |  |  |  |         |  |  |
| -----   |  |  |         |  |  |  |         |  |  |

Supplementary Material (ESI) for Dalton Transactions  
 This journal is © The Royal Society of Chemistry 2002

|        |        |        |        |        |        |        |
|--------|--------|--------|--------|--------|--------|--------|
| 1.Re   | -0.023 | -0.002 | -0.002 | -0.012 | -0.014 | 0.002  |
| -0.014 | 0.006  | 0.028  |        |        |        |        |
| 2.O    | 0.160  | -0.017 | -0.001 | 0.257  | -0.101 | -0.006 |
| -0.011 | 0.003  | -0.005 |        |        |        |        |
| 3.H    | -0.077 | 0.081  | -0.026 | -0.716 | 0.298  | 0.018  |
| 0.018  | -0.011 | 0.001  |        |        |        |        |
| 4.O    | 0.021  | 0.003  | -0.001 | 0.000  | 0.009  | -0.001 |
| 0.017  | -0.004 | 0.000  |        |        |        |        |
| 5.C    | 0.196  | -0.092 | -0.024 | 0.014  | 0.138  | -0.051 |
| 0.067  | 0.138  | -0.117 |        |        |        |        |
| 6.H    | -0.440 | 0.111  | 0.135  | 0.174  | 0.166  | -0.090 |
| 0.128  | 0.367  | -0.122 |        |        |        |        |
| 7.H    | -0.302 | 0.134  | 0.093  | 0.027  | 0.224  | -0.193 |
| -0.085 | 0.305  | -0.212 |        |        |        |        |
| 8.C    | 0.215  | 0.133  | -0.003 | -0.131 | 0.021  | 0.050  |
| 0.097  | -0.189 | -0.170 |        |        |        |        |
| 9.H    | -0.340 | -0.130 | 0.096  | 0.103  | 0.184  | 0.089  |
| -0.010 | -0.374 | -0.353 |        |        |        |        |
| 10.H   | -0.565 | -0.185 | 0.102  | 0.159  | 0.217  | 0.014  |
| 0.192  | -0.486 | -0.195 |        |        |        |        |

|          |        |         |        |         |        |        |
|----------|--------|---------|--------|---------|--------|--------|
|          |        | 696.147 |        | 983.141 |        |        |
| 1023.986 |        |         |        |         |        |        |
| -----    |        |         |        |         |        |        |
| 1.Re     | -0.001 | 0.042   | -0.002 | 0.034   | -0.003 | 0.078  |
| -0.001   | -0.014 | 0.002   |        |         |        |        |
| 2.O      | 0.096  | -0.067  | 0.000  | 0.029   | 0.000  | -0.011 |
| -0.003   | 0.003  | -0.001  |        |         |        |        |
| 3.H      | -0.452 | 0.157   | -0.010 | 0.022   | 0.011  | 0.000  |
| 0.016    | -0.005 | 0.004   |        |         |        |        |
| 4.O      | -0.004 | -0.026  | -0.001 | -0.392  | 0.032  | -0.895 |
| 0.001    | 0.001  | 0.002   |        |         |        |        |
| 5.C      | -0.064 | -0.194  | 0.101  | -0.007  | -0.051 | -0.018 |
| 0.063    | 0.239  | -0.142  |        |         |        |        |
| 6.H      | -0.051 | -0.431  | 0.092  | 0.001   | 0.037  | -0.004 |
| -0.250   | -0.478 | -0.162  |        |         |        |        |
| 7.H      | -0.084 | -0.343  | 0.341  | -0.080  | -0.059 | 0.036  |
| 0.076    | -0.143 | 0.540   |        |         |        |        |
| 8.C      | 0.010  | -0.157  | -0.079 | -0.010  | 0.063  | -0.005 |
| -0.050   | 0.136  | 0.094   |        |         |        |        |
| 9.H      | 0.164  | -0.186  | -0.276 | -0.103  | 0.041  | 0.020  |
| -0.019   | -0.068 | -0.347  |        |         |        |        |
| 10.H     | 0.109  | -0.275  | -0.100 | 0.020   | -0.046 | 0.002  |
| 0.165    | -0.305 | 0.086   |        |         |        |        |

|          |        |          |        |          |        |        |
|----------|--------|----------|--------|----------|--------|--------|
|          |        | 1031.157 |        | 2182.321 |        |        |
| 2186.627 |        |          |        |          |        |        |
| -----    |        |          |        |          |        |        |
| 1.Re     | 0.003  | -0.002   | -0.010 | 0.000    | -0.001 | 0.000  |
| 0.000    | 0.000  | 0.001    |        |          |        |        |
| 2.O      | 0.004  | 0.000    | -0.001 | 0.000    | 0.000  | 0.000  |
| -0.001   | 0.000  | 0.000    |        |          |        |        |
| 3.H      | 0.004  | 0.001    | 0.006  | 0.001    | 0.000  | 0.001  |
| -0.001   | -0.002 | 0.000    |        |          |        |        |
| 4.O      | 0.004  | 0.000    | 0.008  | 0.000    | -0.001 | 0.000  |
| 0.001    | 0.000  | 0.002    |        |          |        |        |
| 5.C      | -0.039 | -0.150   | 0.094  | 0.016    | 0.066  | -0.050 |

Supplementary Material (ESI) for Dalton Transactions  
 This journal is © The Royal Society of Chemistry 2002

|        |        |        |        |        |        |        |        |
|--------|--------|--------|--------|--------|--------|--------|--------|
| 0.022  | 0.086  | -0.062 |        |        |        |        |        |
|        | 6.H    | 0.145  | 0.290  | 0.113  | 0.096  | -0.047 | 0.459  |
| 0.121  | -0.057 | 0.565  |        |        |        |        |        |
|        | 7.H    | -0.040 | 0.088  | -0.338 | -0.183 | -0.307 | -0.182 |
| -0.235 | -0.392 | -0.231 |        |        |        |        |        |
|        | 8.C    | -0.081 | 0.221  | 0.162  | -0.031 | 0.080  | 0.063  |
| 0.026  | -0.066 | -0.050 |        |        |        |        |        |
|        | 9.H    | -0.017 | -0.106 | -0.563 | 0.238  | -0.415 | 0.223  |
| -0.195 | 0.335  | -0.179 |        |        |        |        |        |
|        | 10.H   | 0.248  | -0.477 | 0.159  | -0.067 | -0.013 | -0.562 |
| 0.055  | 0.010  | 0.443  |        |        |        |        |        |

|          |        |        |          |        |        |          |        |
|----------|--------|--------|----------|--------|--------|----------|--------|
|          |        |        | 2309.476 |        |        | 2315.564 |        |
| 2679.597 |        |        |          |        |        |          |        |
|          |        |        | -----    |        |        | -----    |        |
|          | 1.Re   | 0.000  | 0.000    | 0.000  | 0.000  | 0.000    | 0.000  |
| 0.000    | 0.000  | 0.000  |          |        |        |          |        |
|          | 2.O    | 0.000  | 0.000    | 0.000  | 0.000  | 0.000    | 0.000  |
| -0.049   | -0.114 | 0.002  |          |        |        |          |        |
|          | 3.H    | -0.001 | 0.000    | 0.000  | -0.001 | 0.000    | 0.001  |
| 0.371    | 0.920  | -0.018 |          |        |        |          |        |
|          | 4.O    | -0.001 | 0.001    | 0.000  | 0.001  | 0.000    | 0.001  |
| 0.000    | 0.000  | 0.001  |          |        |        |          |        |
|          | 5.C    | 0.016  | 0.018    | 0.029  | 0.077  | 0.083    | 0.153  |
| 0.000    | 0.001  | 0.000  |          |        |        |          |        |
|          | 6.H    | -0.022 | 0.015    | -0.119 | -0.124 | 0.077    | -0.610 |
| 0.000    | 0.000  | 0.001  |          |        |        |          |        |
|          | 7.H    | -0.071 | -0.117   | -0.063 | -0.335 | -0.568   | -0.312 |
| -0.001   | 0.000  | -0.001 |          |        |        |          |        |
|          | 8.C    | -0.066 | 0.088    | -0.155 | 0.012  | -0.017   | 0.033  |
| 0.001    | 0.000  | -0.001 |          |        |        |          |        |
|          | 9.H    | 0.322  | -0.561   | 0.278  | -0.060 | 0.108    | -0.054 |
| 0.001    | 0.001  | -0.001 |          |        |        |          |        |
|          | 10.H   | 0.070  | 0.031    | 0.651  | -0.017 | -0.007   | -0.137 |
| -0.001   | -0.001 | 0.001  |          |        |        |          |        |

List of All Frequencies:

Intensities

=====

| Intensity (degeneracy not counted) | Frequency<br>cm-1 | Dipole Strength<br>1e-40 esu2 cm2 | Absorption<br>km/mole |
|------------------------------------|-------------------|-----------------------------------|-----------------------|
|                                    | -----             | -----                             | -----                 |
|                                    | 164.577311        | 162.265910                        | 6.693840              |
|                                    | 196.443803        | 27.540941                         | 1.356111              |
|                                    | 207.327610        | 43.780685                         | 2.275191              |
|                                    | 211.746625        | 79.436646                         | 4.216144              |
|                                    | 223.412683        | 39.400367                         | 2.206410              |
|                                    | 265.781713        | 148.688893                        | 9.905621              |
|                                    | 336.369707        | 386.792538                        | 32.611670             |
|                                    | 423.005069        | 10.044468                         | 1.065002              |
|                                    | 474.988109        | 10.776204                         | 1.283000              |
|                                    | 504.780522        | 16.790970                         | 2.124499              |

Supplementary Material (ESI) for Dalton Transactions  
 This journal is © The Royal Society of Chemistry 2002

|             |            |            |
|-------------|------------|------------|
| 584.002434  | 68.218422  | 9.986065   |
| 609.979622  | 51.771311  | 7.915577   |
| 630.350347  | 705.660739 | 111.495162 |
| 661.812903  | 408.050741 | 67.690461  |
| 689.682674  | 33.819982  | 5.846565   |
| 696.146593  | 147.940366 | 25.814604  |
| 983.141109  | 444.860559 | 109.627076 |
| 1023.986469 | 49.088791  | 12.599538  |
| 1031.157288 | 48.179317  | 12.452703  |
| 2182.321496 | 8.408087   | 4.599324   |
| 2186.627404 | 6.288886   | 3.446883   |
| 2309.475809 | 0.249693   | 0.144543   |
| 2315.564141 | 0.544441   | 0.315999   |
| 2679.596624 | 80.880678  | 54.324067  |

=====  
 Statistical Thermal Analysis \*\*\* ideal gas assumed \*\*\*  
 =====

Pressure: 1.000000 atm.  
 Temperature: 298.150000 K

Moments of Inertia (and direction vectors)  
 =====

|          |          |          |
|----------|----------|----------|
| 601.0391 | 618.6538 | 642.0294 |
| -----    |          |          |
| -0.2125  | -0.9675  | -0.1371  |
| -0.9770  | 0.2129   | 0.0113   |
| -0.0182  | -0.1364  | 0.9905   |

|        | Temp  |        |       |  |
|--------|-------|--------|-------|--|
| Transl | Rotat | Vibrat | Total |  |
| ----   | ----- | -----  | ----- |  |

|        |                                             |        |        |
|--------|---------------------------------------------|--------|--------|
| 298.15 | Entropy (cal/mole-K):                       |        |        |
| 42.484 | 26.970                                      | 18.359 | 87.814 |
|        | Internal Energy (Kcal/mole):                |        |        |
| 0.889  | 0.889                                       | 34.211 | 35.989 |
|        | Constant Volume Heat Capacity (cal/mole-K): |        |        |
| 2.981  | 2.981                                       | 23.239 | 29.200 |

\*\*\*\*\*
