# Supplementary material for: Vibrational properties and matrix photochemistry of trimethyldioxorhenium(vii), (CH3)3ReO2Electronic supplementary information (ESI) available: further details concerning the vibrational calculations and cartesion coordinates of the optimised geometries. See http://www.rsc.org/suppdata/dt/b2/b204238j/
Source: Royal Society of Chemistry journal article supplement (doi:10.1039/b204238j), 2002-08-07
Supplement: b204238j-6.pdf [file b204238j-6.pdf]

ReOOHCH22

\*\*\*\*\*  
 \* F R E Q U E N C I E S \*  
 \*\*\*\*\*

Coordinates (Cartesian)

=====

| Atom<br>angstrom | bohr<br>Geometric Variables |           |                            |           |           |           |
|------------------|-----------------------------|-----------|----------------------------|-----------|-----------|-----------|
|                  | Y                           | Z         | X<br>(0:frozen, *:LT par.) | Y         | Z         | X         |
| 1 Re             | 0.002149                    | 0.001054  | 0.000685                   | 0.004060  | 0.001991  | 0.000363  |
| 2 O              | -0.009185                   | -0.003684 | 3.670565                   | -0.017357 | -0.006963 | 1.942379  |
| 3 H              | 0.899399                    | -0.026444 | 4.342721                   | 1.699618  | -0.049972 | 2.298068  |
| 4 O              | 0.060304                    | -1.564433 | -1.296761                  | 0.113959  | -2.956352 | -0.686216 |
| 5 C              | -1.593917                   | 0.926732  | -0.782126                  | -3.012068 | 1.751271  | -0.413883 |
| 6 H              | -1.716608                   | 1.994422  | -0.363896                  | -3.243920 | 3.768913  | -0.192566 |
| 7 H              | -2.441526                   | 0.449040  | -1.731970                  | -4.613817 | 0.848562  | -0.916519 |
| 8 C              | 1.483841                    | 1.061687  | -0.975917                  | 2.804055  | 2.006299  | -0.516433 |
| 9 H              | 2.353251                    | 0.617589  | -1.917489                  | 4.447000  | 1.167074  | -1.014691 |
| 10 H             | 1.526738                    | 2.150544  | -0.739884                  | 2.885117  | 4.063941  | -0.391530 |

Atomic Masses:

|       |              |
|-------|--------------|
| 1. Re | 186.95575000 |
| 2. O  | 15.99491400  |
| 3. H  | 1.00782500   |
| 4. O  | 15.99491400  |
| 5. C  | 12.00000000  |
| 6. H  | 1.00782500   |
| 7. H  | 1.00782500   |
| 8. C  | 12.00000000  |
| 9. H  | 1.00782500   |
| 10. H | 1.00782500   |

=====  
 Normal Modes in Symmetry Displacements \*\*\* (cartesians, not  
 mass-weighted) \*\*\*  
 =====

=== A ===

Symmetry Displacements

|        |        |        | 1      |        |        | 2      |        |   |  |
|--------|--------|--------|--------|--------|--------|--------|--------|---|--|
| 3      | -----  |        |        |        |        |        | -----  |   |  |
|        | 1.Re   | 0.036  | 0.000  | 0.000  | 0.000  | 0.036  | 0.000  |   |  |
| 0.000  | 0.000  | 0.036  |        |        |        |        |        |   |  |
|        | 2.O    | -0.111 | 0.000  | -0.005 | 0.000  | -0.100 | 0.000  |   |  |
| 0.000  | 0.000  | -0.099 |        |        |        |        |        |   |  |
|        | 3.H    | -0.111 | 0.000  | -0.007 | -0.006 | -0.098 | -0.003 |   |  |
| 0.001  | 0.000  | -0.097 |        |        |        |        |        |   |  |
|        | 4.O    | -0.116 | 0.000  | 0.002  | 0.000  | -0.121 | 0.000  |   |  |
| 0.010  | 0.000  | -0.116 |        |        |        |        |        |   |  |
|        | 5.C    | -0.109 | 0.000  | 0.001  | 0.010  | -0.112 | 0.005  |   |  |
| -0.005 | 0.000  | -0.114 |        |        |        |        |        |   |  |
|        | 6.H    | -0.106 | 0.000  | 0.001  | 0.011  | -0.107 | 0.005  |   |  |
| -0.012 | 0.000  | -0.113 |        |        |        |        |        |   |  |
|        | 7.H    | -0.110 | 0.000  | 0.003  | 0.015  | -0.116 | 0.007  |   |  |
| -0.002 | 0.000  | -0.118 |        |        |        |        |        |   |  |
|        | 8.C    | -0.108 | 0.000  | 0.002  | -0.009 | -0.112 | -0.004 |   |  |
| -0.006 | 0.000  | -0.115 |        |        |        |        |        |   |  |
|        | 9.H    | -0.109 | 0.000  | 0.003  | -0.015 | -0.116 | -0.007 |   |  |
| -0.004 | 0.000  | -0.118 |        |        |        |        |        |   |  |
|        | 10.H   | -0.105 | 0.000  | 0.001  | -0.009 | -0.108 | -0.004 |   |  |
| -0.013 | 0.000  | -0.114 |        |        |        |        |        |   |  |
|        |        |        | 4      |        |        | 5      |        |   |  |
| 6      | -----  |        |        |        |        |        | -----  |   |  |
|        | 1.Re   | 0.000  | 0.000  | 0.000  | 0.000  | 0.000  | 0.000  |   |  |
| 0.000  | 0.000  | 0.000  |        |        |        |        |        |   |  |
|        | 2.O    | 0.215  | -0.001 | -0.004 | 0.000  | 0.158  | 0.000  |   |  |
| 0.000  | 0.000  | 0.157  |        |        |        |        |        |   |  |
|        | 3.H    | -0.076 | -0.001 | -0.005 | 0.066  | -0.263 | -0.004 | - |  |
| 0.009  |        |        |        |        |        |        |        |   |  |
| 0.000  | -0.267 |        |        |        |        |        |        |   |  |
|        | 4.O    | -0.080 | 0.000  | 0.002  | 0.004  | -0.050 | 0.000  |   |  |
| -0.125 | 0.000  | -0.041 |        |        |        |        |        |   |  |
|        | 5.C    | -0.075 | 0.000  | 0.001  | -0.118 | -0.059 | 0.007  |   |  |
| 0.063  | 0.000  | -0.062 |        |        |        |        |        |   |  |
|        | 6.H    | -0.073 | 0.000  | 0.001  | -0.127 | -0.070 | 0.008  |   |  |
| 0.144  | 0.000  | -0.079 |        |        |        |        |        |   |  |
|        | 7.H    | -0.076 | 0.000  | 0.002  | -0.181 | -0.024 | 0.011  |   |  |
| 0.027  | 0.000  | -0.024 |        |        |        |        |        |   |  |
|        | 8.C    | -0.074 | 0.000  | 0.001  | 0.109  | -0.050 | -0.007 |   |  |
| 0.074  | 0.000  | -0.054 |        |        |        |        |        |   |  |
|        | 9.H    | -0.074 | 0.000  | 0.002  | 0.174  | -0.015 | -0.010 |   |  |
| 0.040  | 0.000  | -0.016 |        |        |        |        |        |   |  |
|        | 10.H   | -0.071 | 0.000  | 0.001  | 0.113  | -0.055 | -0.007 |   |  |
| 0.156  | 0.000  | -0.064 |        |        |        |        |        |   |  |



Supplementary Material (ESI) for Dalton Transactions  
 This journal is © The Royal Society of Chemistry 2002

|        |        |        |        |        |        |        |        |
|--------|--------|--------|--------|--------|--------|--------|--------|
| 0.000  | 0.000  | 0.000  |        |        |        |        |        |
|        | 4.O    | 0.000  | 0.000  | 0.000  | 0.000  | 0.000  | 0.000  |
| 0.000  | 0.000  | 0.000  |        |        |        |        |        |
|        | 5.C    | -0.071 | -0.002 | 0.011  | -0.007 | -0.036 | -0.019 |
| 0.004  | 0.002  | -0.076 |        |        |        |        |        |
|        | 6.H    | 0.775  | -0.025 | 0.098  | 0.000  | 0.971  | -0.015 |
| 0.000  | 0.000  | 0.945  |        |        |        |        |        |
|        | 7.H    | 0.083  | 0.027  | -0.202 | -0.001 | -0.026 | -0.043 |
| -0.047 | 0.007  | -0.033 |        |        |        |        |        |
|        | 8.C    | 0.014  | 0.001  | 0.008  | 0.007  | -0.037 | 0.020  |
| -0.005 | -0.001 | -0.005 |        |        |        |        |        |
|        | 9.H    | 0.232  | 0.029  | -0.181 | 0.023  | -0.028 | 0.020  |
| -0.065 | 0.003  | 0.072  |        |        |        |        |        |
|        | 10.H   | -0.421 | -0.018 | 0.059  | -0.019 | -0.052 | 0.024  |
| 0.125  | -0.021 | -0.019 |        |        |        |        |        |

|        |        |        |        |        |        |        |        |
|--------|--------|--------|--------|--------|--------|--------|--------|
|        |        |        | 16     |        |        | 17     |        |
| 18     |        |        |        |        |        |        |        |
|        |        |        | -----  |        |        | -----  |        |
|        | 1.Re   | 0.000  | 0.000  | 0.000  | 0.000  | 0.000  | 0.000  |
| 0.000  | 0.000  | 0.000  |        |        |        |        |        |
|        | 2.O    | 0.000  | 0.000  | 0.000  | 0.000  | 0.000  | 0.000  |
| 0.000  | 0.000  | 0.000  |        |        |        |        |        |
|        | 3.H    | 0.000  | 0.000  | 0.000  | 0.000  | 0.000  | 0.000  |
| 0.000  | 0.000  | 0.000  |        |        |        |        |        |
|        | 4.O    | 0.000  | 0.000  | 0.000  | 0.000  | 0.000  | 0.000  |
| 0.000  | 0.000  | 0.000  |        |        |        |        |        |
|        | 5.C    | -0.097 | -0.003 | -0.009 | 0.011  | -0.038 | 0.012  |
| 0.004  | 0.004  | -0.093 |        |        |        |        |        |
|        | 6.H    | 0.000  | 0.000  | 0.000  | 0.000  | 0.000  | 0.000  |
| 0.000  | 0.000  | 0.000  |        |        |        |        |        |
|        | 7.H    | 0.893  | 0.007  | 0.103  | 0.000  | 0.974  | 0.028  |
| 0.000  | 0.000  | 0.866  |        |        |        |        |        |
|        | 8.C    | 0.007  | 0.001  | -0.005 | -0.010 | -0.038 | -0.012 |
| 0.009  | -0.001 | 0.022  |        |        |        |        |        |
|        | 9.H    | -0.066 | 0.010  | 0.095  | -0.025 | -0.045 | -0.010 |
| 0.153  | 0.027  | -0.084 |        |        |        |        |        |
|        | 10.H   | 0.238  | 0.004  | -0.032 | 0.011  | -0.028 | -0.015 |
| -0.309 | -0.054 | 0.060  |        |        |        |        |        |

|       |        |       |       |       |       |        |       |
|-------|--------|-------|-------|-------|-------|--------|-------|
|       |        |       | 19    |       |       | 20     |       |
| 21    |        |       |       |       |       |        |       |
|       |        |       | ----- |       |       | -----  |       |
|       | 1.Re   | 0.000 | 0.000 | 0.000 | 0.000 | 0.000  | 0.000 |
| 0.000 | 0.000  | 0.000 |       |       |       |        |       |
|       | 2.O    | 0.000 | 0.000 | 0.000 | 0.000 | 0.000  | 0.000 |
| 0.000 | 0.000  | 0.000 |       |       |       |        |       |
|       | 3.H    | 0.000 | 0.000 | 0.000 | 0.000 | 0.000  | 0.000 |
| 0.000 | 0.000  | 0.000 |       |       |       |        |       |
|       | 4.O    | 0.000 | 0.000 | 0.000 | 0.000 | 0.000  | 0.000 |
| 0.000 | 0.000  | 0.000 |       |       |       |        |       |
|       | 5.C    | 0.020 | 0.003 | 0.003 | 0.015 | -0.040 | 0.011 |
| 0.000 | -0.004 | 0.019 |       |       |       |        |       |
|       | 6.H    | 0.000 | 0.000 | 0.000 | 0.000 | 0.000  | 0.000 |
| 0.000 | 0.000  | 0.000 |       |       |       |        |       |
|       | 7.H    | 0.000 | 0.000 | 0.000 | 0.000 | 0.000  | 0.000 |
| 0.000 | 0.000  | 0.000 |       |       |       |        |       |

Supplementary Material (ESI) for Dalton Transactions  
 This journal is © The Royal Society of Chemistry 2002

|        |        |        |        |        |        |        |
|--------|--------|--------|--------|--------|--------|--------|
| 8.C    | -0.115 | -0.001 | -0.011 | -0.017 | -0.040 | -0.010 |
| 0.032  | 0.002  | -0.088 |        |        |        |        |
| 9.H    | 0.842  | -0.039 | 0.162  | 0.000  | 0.972  | 0.005  |
| 0.000  | 0.000  | 0.859  |        |        |        |        |
| 10.H   | 0.294  | 0.025  | -0.059 | 0.030  | -0.029 | -0.016 |
| -0.377 | 0.023  | -0.042 |        |        |        |        |

| 24     |        |        | 22     |        |        | 23     |       |  |
|--------|--------|--------|--------|--------|--------|--------|-------|--|
| -----  |        |        | -----  |        |        | -----  |       |  |
| 1.Re   | 0.000  | 0.000  | 0.000  | 0.000  | 0.000  | 0.000  | 0.000 |  |
| 0.000  | 0.000  | 0.000  |        |        |        |        |       |  |
| 2.O    | 0.000  | 0.000  | 0.000  | 0.000  | 0.000  | 0.000  | 0.000 |  |
| 0.000  | 0.000  | 0.000  |        |        |        |        |       |  |
| 3.H    | 0.000  | 0.000  | 0.000  | 0.000  | 0.000  | 0.000  | 0.000 |  |
| 0.000  | 0.000  | 0.000  |        |        |        |        |       |  |
| 4.O    | 0.000  | 0.000  | 0.000  | 0.000  | 0.000  | 0.000  | 0.000 |  |
| 0.000  | 0.000  | 0.000  |        |        |        |        |       |  |
| 5.C    | 0.001  | 0.010  | 0.010  | -0.002 | -0.038 | -0.029 |       |  |
| 0.007  | -0.204 | -0.009 |        |        |        |        |       |  |
| 6.H    | 0.000  | 0.000  | 0.000  | 0.000  | 0.000  | 0.000  |       |  |
| 0.000  | 0.000  | 0.000  |        |        |        |        |       |  |
| 7.H    | 0.000  | 0.000  | 0.000  | 0.000  | 0.000  | 0.000  |       |  |
| 0.000  | 0.000  | 0.000  |        |        |        |        |       |  |
| 8.C    | -0.010 | 0.014  | -0.085 | 0.002  | -0.039 | 0.003  |       |  |
| -0.007 | 0.204  | 0.009  |        |        |        |        |       |  |
| 9.H    | 0.000  | 0.000  | 0.000  | 0.000  | 0.000  | 0.000  |       |  |
| 0.000  | 0.000  | 0.000  |        |        |        |        |       |  |
| 10.H   | 0.115  | -0.278 | 0.900  | 0.000  | 0.924  | 0.305  |       |  |
| 0.000  | 0.000  | 0.000  |        |        |        |        |       |  |

Frequencies and Normal Modes

=====

| 6           | 1           | 2           | 3           | 4           | 5           |
|-------------|-------------|-------------|-------------|-------------|-------------|
|             | 7           | 8           |             |             |             |
|             | 201.4955    | 209.9891    | 237.2318    | 240.8274    | 247.0381    |
| 311.7918    | 449.5951    | 566.2521    |             |             |             |
|             | -----       | -----       | -----       | -----       | -----       |
| 1           | -0.30511020 | -0.09730592 | 0.40772177  | 0.37593849  | 0.33139582  |
| 0.11585682  | 0.02926495  | 0.12899943  |             |             |             |
| 2           | 0.50765495  | -0.05006884 | 0.23756288  | 0.27046743  | -0.00834747 |
| -0.40638170 | 0.01620096  | 0.00121388  |             |             |             |
| 3           | 0.11877139  | -0.49814970 | -0.29753301 | -0.14774703 | 0.36654096  |
| -0.07447217 | 0.00527169  | -0.09817623 |             |             |             |
| 4           | -0.20232451 | -0.04437131 | 0.28997057  | 0.27872700  | 0.23403745  |
| 0.10539374  | -0.03294611 | -0.34811186 |             |             |             |
| 5           | -0.35628146 | 0.02708552  | -0.53102213 | 0.41702310  | -0.09159215 |
| 0.10780135  | 0.13925624  | -0.02435396 |             |             |             |
| 6           | 0.23266542  | 0.74652358  | -0.00505567 | 0.01352141  | 0.17893201  |
| 0.21616138  | 0.35750484  | -0.08387798 |             |             |             |
| 7           | 0.14163735  | -0.29573123 | 0.00950891  | 0.01061494  | -0.12155590 |
| 0.29993594  | 0.61371332  | 0.21410467  |             |             |             |
| 8           | -0.18831317 | -0.01967324 | 0.24229810  | -0.57793229 | 0.03799845  |
| 0.43246559  | -0.13370214 | 0.04450109  |             |             |             |
| 9           | -0.00610563 | 0.06334051  | -0.03938473 | 0.02427977  | 0.59867118  |



Supplementary Material (ESI) for Dalton Transactions  
This journal is © The Royal Society of Chemistry 2002

|             |             |             |             |             |             |
|-------------|-------------|-------------|-------------|-------------|-------------|
| 12          | -0.17184212 | -0.61108561 | 0.04550923  | -0.01546065 | -0.12054414 |
| -0.37701075 | -0.20518910 | 0.02629499  |             |             |             |
| 13          | 0.14824930  | 0.16197562  | 0.01794170  | -0.45633636 | -0.19825426 |
| -0.05880730 | -0.21461067 | 0.04120539  |             |             |             |
| 14          | -0.44052824 | -0.13003248 | -0.17814158 | 0.12647679  | 0.11918199  |
| -0.10876194 | 0.22016194  | -0.03621849 |             |             |             |
| 15          | -0.03463510 | -0.07062919 | -0.01733776 | 0.14370313  | 0.06597525  |
| 0.01072425  | 0.07925520  | -0.01220263 |             |             |             |
| 16          | -0.09133562 | 0.06495832  | -0.15400539 | -0.44152933 | -0.15600272 |
| -0.10210865 | -0.37967510 | -0.01500486 |             |             |             |
| 17          | 0.23321545  | 0.09506977  | 0.13721612  | 0.21454140  | 0.08064128  |
| -0.14427519 | 0.21067730  | 0.00347520  |             |             |             |
| 18          | -0.27202661 | -0.14601459 | -0.08610463 | 0.09713975  | 0.00245238  |
| 0.12629741  | 0.16392373  | 0.01330604  |             |             |             |
| 19          | 0.24593966  | 0.06108279  | -0.08961940 | 0.52526757  | 0.03848070  |
| -0.24217534 | -0.47599793 | 0.10527162  |             |             |             |
| 20          | 0.33684838  | -0.17841047 | -0.09386273 | 0.26545405  | 0.05205733  |
| 0.05539277  | -0.23772259 | 0.05590941  |             |             |             |
| 21          | 0.33230025  | -0.28063445 | -0.05836035 | -0.19541314 | 0.01673145  |
| 0.17787456  | 0.21867428  | -0.02955796 |             |             |             |
| 22          | 0.18199719  | -0.10386840 | -0.03735131 | -0.04865703 | -0.02791316 |
| 0.00267277  | 0.09125750  | 0.00020154  |             |             |             |
| 23          | -0.51579528 | 0.25980549  | 0.10555440  | 0.14003573  | 0.10111532  |
| 0.03720158  | -0.28383442 | -0.00446100 |             |             |             |
| 24          | -0.05097221 | -0.38768142 | -0.01008874 | 0.05060304  | 0.08547115  |
| 0.63701369  | -0.14780110 | -0.00791986 |             |             |             |

|           | 17        | 18        | 19        | 20        | 21        |
|-----------|-----------|-----------|-----------|-----------|-----------|
| 22        | 23        | 24        |           |           |           |
|           | 984.8770  | 1305.8278 | 1313.6097 | 3002.4845 | 3005.7998 |
| 3098.2402 | 3106.0081 | 3669.6822 |           |           |           |

-----

|             |             |             |             |             |             |
|-------------|-------------|-------------|-------------|-------------|-------------|
| 1           | 0.22244072  | -0.00412849 | -0.00934332 | -0.00064790 | 0.00163794  |
| -0.00020073 | -0.00026787 | -0.00024179 |             |             |             |
| 2           | -0.02383281 | -0.05155956 | 0.02845684  | 0.00356323  | 0.00093033  |
| 0.00038414  | 0.00009614  | 0.00179139  |             |             |             |
| 3           | 0.53042708  | 0.02851481  | 0.04792027  | 0.00055067  | -0.00203795 |
| -0.00051453 | -0.00105294 | 0.00028256  |             |             |             |
| 4           | 0.14501014  | -0.00582876 | -0.00684446 | -0.00028418 | 0.00212270  |
| 0.00003028  | -0.00006451 | 0.10857161  |             |             |             |
| 5           | -0.00641581 | -0.03250913 | 0.01805477  | 0.00183158  | 0.00031709  |
| -0.00074345 | 0.00071196  | 0.35445908  |             |             |             |
| 6           | 0.32794496  | 0.01724987  | 0.03324627  | 0.00097138  | -0.00176196 |
| -0.00030457 | -0.00021235 | -0.00436110 |             |             |             |
| 7           | -0.27210665 | 0.00020599  | -0.00242788 | 0.00075129  | -0.00076015 |
| -0.00199336 | -0.00274231 | 0.08261107  |             |             |             |
| 8           | 0.02862189  | -0.06108848 | 0.03503659  | 0.00557595  | 0.00121036  |
| 0.00044209  | 0.00027037  | 0.12219599  |             |             |             |
| 9           | -0.67025773 | 0.01330613  | 0.02231088  | 0.00122030  | -0.00563073 |
| -0.00054347 | -0.00146292 | -0.02138515 |             |             |             |
| 10          | 0.03613423  | 0.00206908  | -0.00715323 | -0.00042021 | 0.00063554  |
| -0.00104582 | -0.00051017 | -0.37745815 |             |             |             |
| 11          | -0.00686310 | -0.02478857 | 0.01412493  | 0.00134556  | 0.00157407  |
| 0.00046349  | 0.00013629  | -0.83531446 |             |             |             |
| 12          | 0.04051398  | 0.00436564  | 0.00972403  | 0.00021349  | -0.00086518 |
| -0.00346106 | -0.00468164 | 0.01032206  |             |             |             |
| 13          | -0.02958828 | -0.33444148 | -0.07966459 | -0.11767975 | -0.17235514 |
| -0.01388911 | 0.14601409  | -0.00076137 |             |             |             |
| 14          | 0.02843636  | -0.60235930 | -0.11823702 | 0.03841826  | 0.05321880  |

Supplementary Material (ESI) for Dalton Transactions  
This journal is © The Royal Society of Chemistry 2002

0.00952237 -0.07301534 -0.00004498  
15 0.01351946 -0.01996996 -0.00142733 -0.43596021 -0.63176765  
-0.07499711 0.57025583 -0.00042666  
16 -0.02424690 0.05102292 0.02254724 0.15521974 0.24200173  
-0.05916882 0.39509083 0.00050048  
17 -0.01190915 -0.30750190 -0.05621317 0.26075728 0.40039715  
-0.08162121 0.57942682 -0.00008953  
18 0.01860994 0.56883515 0.11156354 0.10720972 0.16695579  
-0.04548574 0.35122726 -0.00021163  
19 -0.04271527 0.01787024 -0.03624877 -0.28674503 0.19406247  
0.37915291 0.03313841 0.00023306  
20 0.00236781 -0.09915325 0.23878544 0.43075027 -0.26273590  
-0.56371927 -0.06551057 -0.00089465  
21 0.02331071 -0.16582459 0.70306721 -0.21022247 0.15705933  
0.25774962 0.01683823 -0.00016363  
22 0.01179026 0.04260386 -0.17024050 0.57668117 -0.38487558  
0.64099992 0.08344005 -0.00057111  
23 -0.02523210 -0.14822411 0.54436066 0.21229935 -0.13184229  
0.18822145 0.07608943 0.00047825  
24 0.08239664 -0.18254204 -0.28082454 -0.03722384 0.15700869  
0.08695771 0.12043803 0.00093786

Intensities

=====

| Intensity (degeneracy not counted) | Frequency<br>cm-1 | Dipole Strength<br>1e-40 esu <sup>2</sup> cm <sup>2</sup> | Absorption<br>km/mole |
|------------------------------------|-------------------|-----------------------------------------------------------|-----------------------|
|                                    | -----             | -----                                                     | -----                 |
|                                    | 201.495490        | 142.401412                                                | 7.192133              |
|                                    | 209.989111        | 15.632280                                                 | 0.822805              |
|                                    | 237.231767        | 24.649234                                                 | 1.465731              |
|                                    | 240.827362        | 38.681897                                                 | 2.335026              |
|                                    | 247.038126        | 81.873563                                                 | 5.069741              |
|                                    | 311.791802        | 270.465804                                                | 21.137573             |
|                                    | 449.595122        | 581.514040                                                | 65.532972             |
|                                    | 566.252107        | 17.845992                                                 | 2.532962              |
|                                    | 611.666549        | 20.117334                                                 | 3.084347              |
|                                    | 626.441025        | 27.378078                                                 | 4.298938              |
|                                    | 637.758675        | 659.699396                                                | 105.458243            |
|                                    | 738.160808        | 139.671022                                                | 25.842550             |
|                                    | 770.073268        | 139.866272                                                | 26.997473             |
|                                    | 780.634911        | 66.627083                                                 | 13.036975             |
|                                    | 793.665870        | 399.028823                                                | 79.381635             |
|                                    | 887.708189        | 293.093625                                                | 65.216077             |
|                                    | 984.877009        | 437.644042                                                | 108.039133            |
|                                    | 1305.827830       | 19.072135                                                 | 6.242568              |
|                                    | 1313.609726       | 23.287115                                                 | 7.667612              |
|                                    | 3002.484534       | 3.302467                                                  | 2.485406              |
|                                    | 3005.799848       | 4.332897                                                  | 3.264499              |
|                                    | 3098.240216       | 0.537018                                                  | 0.417044              |
|                                    | 3106.008145       | 0.937902                                                  | 0.730194              |
|                                    | 3669.682216       | 99.086345                                                 | 91.142374             |

Zero-Point Energy : 0.063326 a.u.  
===== 1.723186 eV



=====  
 Vibrations and Normal Modes \*\*\* (cartesian coordinates, NOT  
 mass-weighted) \*\*\*  
 =====

The headers on the normal mode eigenvectors below give the Frequency in cm-1  
 (a negative value means an imaginary frequency, no output for  
 (almost-)zero frequencies)

| 237.232 | 201.495 |        |        | 209.989 |        |        |
|---------|---------|--------|--------|---------|--------|--------|
| -----   |         |        | -----  |         |        |        |
| 1.Re    | 0.017   | -0.027 | -0.006 | 0.008   | 0.004  | 0.043  |
| -0.028  | -0.017  | 0.021  |        |         |        |        |
| 2.O     | 0.014   | 0.160  | -0.041 | -0.003  | -0.022 | -0.397 |
| -0.032  | 0.208   | -0.049 |        |         |        |        |
| 3.H     | -0.057  | 0.195  | 0.399  | 0.015   | -0.031 | -0.543 |
| -0.204  | 0.278   | 0.134  |        |         |        |        |
| 4.O     | -0.050  | 0.106  | 0.027  | 0.255   | -0.006 | -0.058 |
| 0.143   | -0.064  | -0.054 |        |         |        |        |
| 5.C     | -0.163  | 0.066  | 0.065  | -0.170  | 0.022  | -0.001 |
| -0.032  | -0.099  | -0.107 |        |         |        |        |
| 6.H     | 0.186   | 0.157  | 0.007  | -0.472  | 0.024  | 0.061  |
| -0.104  | -0.287  | -0.117 |        |         |        |        |
| 7.H     | -0.531  | 0.129  | 0.349  | 0.011   | -0.002 | -0.151 |
| 0.058   | -0.046  | -0.304 |        |         |        |        |
| 8.C     | 0.000   | -0.033 | 0.001  | -0.215  | -0.042 | -0.004 |
| 0.277   | 0.135   | -0.044 |        |         |        |        |
| 9.H     | 0.237   | 0.018  | -0.174 | -0.195  | -0.038 | -0.018 |
| 0.468   | 0.243   | -0.047 |        |         |        |        |
| 10.H    | -0.389  | -0.035 | 0.042  | -0.321  | -0.080 | 0.012  |
| 0.393   | 0.164   | -0.055 |        |         |        |        |

| 311.792 | 240.827 |        |        | 247.038 |        |        |
|---------|---------|--------|--------|---------|--------|--------|
| -----   |         |        | -----  |         |        |        |
| 1.Re    | 0.024   | 0.017  | -0.009 | 0.019   | 0.000  | 0.021  |
| 0.005   | -0.019  | -0.003 |        |         |        |        |
| 2.O     | 0.031   | 0.067  | 0.024  | 0.021   | -0.022 | -0.017 |
| 0.012   | 0.073   | 0.051  |        |         |        |        |
| 3.H     | -0.005  | 0.083  | 0.053  | 0.052   | -0.034 | 0.016  |
| -0.086  | 0.101   | -0.537 |        |         |        |        |
| 4.O     | -0.116  | -0.239 | 0.044  | -0.135  | 0.018  | 0.096  |
| -0.032  | 0.136   | 0.019  |        |         |        |        |
| 5.C     | -0.200  | 0.047  | -0.058 | -0.027  | -0.095 | -0.159 |
| -0.038  | 0.008   | 0.070  |        |         |        |        |
| 6.H     | -0.541  | -0.156 | -0.018 | -0.059  | -0.377 | -0.188 |
| -0.514  | 0.059   | 0.171  |        |         |        |        |
| 7.H     | -0.211  | 0.208  | -0.340 | -0.094  | 0.070  | -0.386 |
| 0.181   | -0.039  | -0.088 |        |         |        |        |
| 8.C     | 0.005   | -0.067 | 0.099  | -0.078  | 0.106  | -0.170 |
| 0.002   | -0.003  | -0.068 |        |         |        |        |
| 9.H     | -0.225  | -0.060 | 0.378  | -0.065  | -0.052 | -0.504 |
| -0.283  | -0.108  | 0.056  |        |         |        |        |
| 10.H    | 0.247   | -0.255 | 0.084  | -0.292  | 0.412  | -0.161 |
| 0.448   | 0.076   | -0.120 |        |         |        |        |

|         |        |         |        |         |        |        |
|---------|--------|---------|--------|---------|--------|--------|
| 611.667 |        | 449.595 |        | 566.252 |        |        |
|         | -----  | -----   | -----  | -----   |        |        |
| 1.Re    | -0.001 | -0.001  | 0.000  | -0.005  | 0.000  | 0.004  |
| 0.000   | 0.004  | 0.000   |        |         |        |        |
| 2.O     | 0.011  | -0.022  | -0.059 | 0.101   | 0.004  | 0.003  |
| 0.002   | 0.001  | -0.005  |        |         |        |        |
| 3.H     | -0.005 | 0.004   | 0.846  | 0.069   | 0.017  | -0.022 |
| -0.042  | 0.021  | 0.044   |        |         |        |        |
| 4.O     | -0.005 | 0.031   | 0.004  | -0.045  | -0.008 | 0.022  |
| 0.011   | -0.027 | 0.001   |        |         |        |        |
| 5.C     | 0.018  | 0.004   | 0.049  | -0.029  | 0.003  | -0.069 |
| -0.039  | -0.040 | -0.083  |        |         |        |        |
| 6.H     | -0.257 | -0.009  | 0.102  | -0.221  | 0.462  | 0.029  |
| -0.033  | 0.463  | -0.019  |        |         |        |        |
| 7.H     | 0.266  | -0.058  | -0.106 | 0.459   | -0.362 | 0.079  |
| -0.005  | -0.279 | 0.324   |        |         |        |        |
| 8.C     | -0.007 | 0.005   | -0.043 | -0.006  | -0.005 | -0.036 |
| 0.035   | -0.021 | 0.080   |        |         |        |        |
| 9.H     | -0.237 | -0.073  | 0.070  | 0.414   | 0.260  | 0.021  |
| -0.260  | -0.361 | -0.274  |        |         |        |        |
| 10.H    | 0.204  | -0.003  | -0.064 | -0.213  | -0.281 | 0.000  |
| 0.138   | 0.533  | 0.040   |        |         |        |        |

|         |        |         |        |         |        |        |
|---------|--------|---------|--------|---------|--------|--------|
| 738.161 |        | 626.441 |        | 637.759 |        |        |
|         | -----  | -----   | -----  | -----   |        |        |
| 1.Re    | -0.001 | 0.001   | -0.004 | 0.050   | 0.001  | 0.003  |
| -0.001  | 0.008  | 0.000   |        |         |        |        |
| 2.O     | -0.024 | 0.003   | 0.008  | -0.511  | -0.001 | 0.007  |
| -0.005  | -0.001 | -0.007  |        |         |        |        |
| 3.H     | -0.018 | -0.001  | -0.017 | -0.293  | -0.093 | 0.061  |
| 0.111   | -0.046 | 0.081   |        |         |        |        |
| 4.O     | -0.019 | -0.002  | -0.032 | -0.045  | -0.005 | 0.030  |
| -0.001  | -0.008 | -0.001  |        |         |        |        |
| 5.C     | 0.027  | 0.084   | 0.066  | -0.031  | -0.006 | -0.064 |
| 0.102   | -0.089 | -0.002  |        |         |        |        |
| 6.H     | -0.289 | -0.180  | 0.094  | -0.150  | 0.403  | 0.011  |
| -0.464  | 0.121  | 0.143   |        |         |        |        |
| 7.H     | 0.338  | 0.130   | -0.356 | 0.364   | -0.320 | 0.095  |
| -0.499  | 0.170  | 0.165   |        |         |        |        |
| 8.C     | 0.048  | -0.103  | 0.081  | -0.017  | 0.003  | -0.053 |
| -0.078  | -0.071 | -0.007  |        |         |        |        |
| 9.H     | 0.352  | -0.195  | -0.461 | 0.240   | 0.220  | 0.099  |
| 0.472   | 0.194  | -0.103  |        |         |        |        |
| 10.H    | -0.326 | 0.306   | 0.098  | -0.057  | -0.278 | -0.035 |
| 0.322   | 0.119  | -0.062  |        |         |        |        |

|         |        |         |       |         |        |        |
|---------|--------|---------|-------|---------|--------|--------|
| 793.666 |        | 770.073 |       | 780.635 |        |        |
|         | -----  | -----   | ----- | -----   |        |        |
| 1.Re    | -0.001 | 0.037   | 0.004 | -0.006  | -0.006 | 0.021  |
| 0.008   | -0.003 | -0.009  |       |         |        |        |
| 2.O     | -0.005 | 0.012   | 0.004 | 0.002   | 0.000  | -0.004 |

Supplementary Material (ESI) for Dalton Transactions  
 This journal is © The Royal Society of Chemistry 2002

|        |        |        |        |        |        |        |        |
|--------|--------|--------|--------|--------|--------|--------|--------|
| 0.007  | 0.005  | 0.001  |        |        |        |        |        |
|        | 3.H    | 0.256  | -0.094 | -0.056 | 0.010  | -0.003 | 0.037  |
| 0.102  | -0.031 | 0.032  |        |        |        |        |        |
|        | 4.O    | 0.001  | -0.018 | -0.004 | 0.008  | 0.002  | -0.006 |
| -0.013 | 0.001  | -0.009 |        |        |        |        |        |
|        | 5.C    | -0.130 | -0.199 | 0.120  | 0.007  | 0.234  | -0.136 |
| -0.108 | -0.024 | 0.062  |        |        |        |        |        |
|        | 6.H    | 0.318  | -0.377 | 0.015  | 0.451  | 0.206  | -0.242 |
| 0.350  | -0.254 | -0.056 |        |        |        |        |        |
|        | 7.H    | 0.110  | -0.395 | 0.201  | 0.038  | 0.247  | -0.167 |
| 0.318  | -0.225 | -0.037 |        |        |        |        |        |
|        | 8.C    | 0.086  | -0.241 | -0.161 | -0.035 | -0.171 | -0.115 |
| -0.146 | 0.049  | 0.094  |        |        |        |        |        |
|        | 9.H    | 0.064  | -0.315 | -0.259 | 0.142  | -0.085 | -0.121 |
| 0.347  | 0.307  | 0.033  |        |        |        |        |        |
|        | 10.H   | 0.106  | -0.308 | -0.170 | 0.633  | -0.011 | -0.206 |
| 0.459  | 0.411  | 0.015  |        |        |        |        |        |

887.708

984.877

1305.828

|        |        |        |        |        |        |        |        |
|--------|--------|--------|--------|--------|--------|--------|--------|
|        | 1.Re   | 0.003  | 0.007  | 0.000  | 0.031  | -0.003 | 0.075  |
| 0.000  | -0.002 | 0.001  |        |        |        |        |        |
|        | 2.O    | 0.035  | -0.060 | 0.000  | 0.026  | 0.005  | -0.011 |
| -0.001 | 0.000  | 0.000  |        |        |        |        |        |
|        | 3.H    | -0.929 | 0.332  | -0.002 | 0.103  | -0.020 | 0.000  |
| 0.003  | -0.001 | 0.000  |        |        |        |        |        |
|        | 4.O    | -0.007 | -0.004 | -0.005 | -0.368 | 0.031  | -0.844 |
| -0.001 | -0.001 | -0.001 |        |        |        |        |        |
|        | 5.C    | -0.008 | -0.024 | 0.014  | -0.006 | -0.061 | -0.025 |
| 0.028  | 0.107  | -0.065 |        |        |        |        |        |
|        | 6.H    | 0.042  | -0.055 | 0.003  | -0.002 | 0.116  | 0.001  |
| -0.274 | -0.620 | -0.063 |        |        |        |        |        |
|        | 7.H    | -0.028 | -0.023 | 0.032  | -0.161 | -0.052 | 0.108  |
| 0.028  | -0.303 | 0.618  |        |        |        |        |        |
|        | 8.C    | -0.018 | -0.027 | -0.011 | -0.004 | 0.070  | -0.014 |
| -0.008 | 0.020  | 0.014  |        |        |        |        |        |
|        | 9.H    | 0.096  | 0.028  | -0.032 | -0.220 | 0.011  | 0.102  |
| 0.012  | -0.051 | -0.137 |        |        |        |        |        |
|        | 10.H   | 0.033  | -0.018 | -0.019 | 0.018  | -0.108 | -0.002 |
| 0.058  | -0.137 | 0.006  |        |        |        |        |        |

1313.610

3002.485

3005.800

|       |        |        |        |        |       |        |        |
|-------|--------|--------|--------|--------|-------|--------|--------|
|       | 1.Re   | 0.000  | -0.001 | -0.002 | 0.000 | 0.000  | 0.000  |
| 0.000 | 0.000  | 0.000  |        |        |       |        |        |
|       | 2.O    | 0.000  | 0.000  | -0.001 | 0.000 | 0.000  | 0.000  |
| 0.000 | 0.000  | 0.000  |        |        |       |        |        |
|       | 3.H    | 0.002  | 0.000  | 0.006  | 0.000 | 0.000  | 0.001  |
| 0.000 | -0.001 | 0.000  |        |        |       |        |        |
|       | 4.O    | 0.002  | -0.001 | 0.003  | 0.000 | 0.000  | 0.000  |
| 0.000 | 0.000  | 0.001  |        |        |       |        |        |
|       | 5.C    | -0.005 | -0.024 | 0.015  | 0.005 | 0.025  | -0.024 |
| 0.009 | 0.040  | -0.034 |        |        |       |        |        |
|       | 6.H    | 0.062  | 0.128  | 0.014  | 0.093 | -0.041 | 0.434  |
| 0.138 | -0.057 | 0.629  |        |        |       |        |        |

Supplementary Material (ESI) for Dalton Transactions  
 This journal is © The Royal Society of Chemistry 2002

|        |        |        |        |        |        |        |
|--------|--------|--------|--------|--------|--------|--------|
| 7.H    | -0.013 | 0.068  | -0.129 | -0.153 | -0.253 | -0.157 |
| -0.237 | -0.390 | -0.241 |        |        |        |        |
| 8.C    | -0.036 | 0.098  | 0.071  | -0.014 | 0.038  | 0.033  |
| 0.010  | -0.026 | -0.022 |        |        |        |        |
| 9.H    | 0.032  | -0.254 | -0.643 | 0.246  | -0.426 | 0.238  |
| -0.170 | 0.290  | -0.162 |        |        |        |        |
| 10.H   | 0.298  | -0.610 | 0.038  | -0.078 | -0.008 | -0.617 |
| 0.053  | 0.004  | 0.411  |        |        |        |        |

|          |        |          |        |        |          |        |  |
|----------|--------|----------|--------|--------|----------|--------|--|
|          |        | 3098.240 |        |        | 3106.008 |        |  |
| 3669.682 |        |          |        |        |          |        |  |
| -----    |        |          |        |        |          |        |  |
| 1.Re     | 0.000  | 0.000    | 0.000  | 0.000  | 0.000    | 0.000  |  |
| 0.000    | 0.000  | 0.000    |        |        |          |        |  |
| 2.O      | 0.000  | 0.000    | 0.000  | 0.000  | 0.000    | 0.000  |  |
| 0.024    | 0.058  | -0.001   |        |        |          |        |  |
| 3.H      | 0.000  | 0.000    | 0.000  | 0.000  | 0.000    | 0.000  |  |
| -0.375   | -0.925 | 0.019    |        |        |          |        |  |
| 4.O      | 0.000  | 0.000    | 0.000  | 0.000  | 0.000    | 0.000  |  |
| 0.000    | 0.000  | 0.000    |        |        |          |        |  |
| 5.C      | 0.006  | 0.007    | 0.010  | 0.040  | 0.045    | 0.076  |  |
| 0.000    | 0.000  | 0.000    |        |        |          |        |  |
| 6.H      | -0.014 | 0.010    | -0.076 | -0.116 | 0.079    | -0.586 |  |
| 0.000    | 0.000  | 0.000    |        |        |          |        |  |
| 7.H      | -0.052 | -0.086   | -0.046 | -0.358 | -0.609   | -0.332 |  |
| 0.000    | 0.000  | 0.000    |        |        |          |        |  |
| 8.C      | -0.034 | 0.047    | -0.078 | 0.004  | -0.006   | 0.011  |  |
| 0.000    | 0.000  | 0.000    |        |        |          |        |  |
| 9.H      | 0.339  | -0.592   | 0.291  | -0.040 | 0.073    | -0.036 |  |
| -0.001   | -0.001 | 0.000    |        |        |          |        |  |
| 10.H     | 0.068  | 0.035    | 0.645  | -0.012 | -0.006   | -0.099 |  |
| 0.001    | 0.001  | 0.000    |        |        |          |        |  |

List of All Frequencies:

Intensities  
 =====

| Intensity (degeneracy not counted) | Frequency<br>cm-1 | Dipole Strength<br>1e-40 esu2 cm2 | Absorption<br>km/mole |
|------------------------------------|-------------------|-----------------------------------|-----------------------|
|                                    | -----             | -----                             | -----                 |
|                                    | 201.495490        | 142.401412                        | 7.192133              |
|                                    | 209.989111        | 15.632280                         | 0.822805              |
|                                    | 237.231767        | 24.649234                         | 1.465731              |
|                                    | 240.827362        | 38.681897                         | 2.335026              |
|                                    | 247.038126        | 81.873563                         | 5.069741              |
|                                    | 311.791802        | 270.465804                        | 21.137573             |
|                                    | 449.595122        | 581.514040                        | 65.532972             |
|                                    | 566.252107        | 17.845992                         | 2.532962              |
|                                    | 611.666549        | 20.117334                         | 3.084347              |
|                                    | 626.441025        | 27.378078                         | 4.298938              |
|                                    | 637.758675        | 659.699396                        | 105.458243            |
|                                    | 738.160808        | 139.671022                        | 25.842550             |
|                                    | 770.073268        | 139.866272                        | 26.997473             |

Supplementary Material (ESI) for Dalton Transactions  
This journal is © The Royal Society of Chemistry 2002

|             |            |            |
|-------------|------------|------------|
| 780.634911  | 66.627083  | 13.036975  |
| 793.665870  | 399.028823 | 79.381635  |
| 887.708189  | 293.093625 | 65.216077  |
| 984.877009  | 437.644042 | 108.039133 |
| 1305.827830 | 19.072135  | 6.242568   |
| 1313.609726 | 23.287115  | 7.667612   |
| 3002.484534 | 3.302467   | 2.485406   |
| 3005.799848 | 4.332897   | 3.264499   |
| 3098.240216 | 0.537018   | 0.417044   |
| 3106.008145 | 0.937902   | 0.730194   |
| 3669.682216 | 99.086345  | 91.142374  |

=====  
Statistical Thermal Analysis \*\*\* ideal gas assumed \*\*\*  
=====

Pressure: 1.000000 atm.  
Temperature: 298.150000 K

Moments of Inertia (and direction vectors)  
=====

|          |          |          |
|----------|----------|----------|
| 519.8501 | 544.3715 | 557.6067 |
| -----    | -----    | -----    |
| 0.9362   | 0.0760   | -0.3431  |
| -0.0872  | 0.9960   | -0.0173  |
| 0.3404   | 0.0461   | 0.9391   |

| Temp  | Transl | Rotat | Vibrat | Total |
|-------|--------|-------|--------|-------|
| ----- | -----  | ----- | -----  | ----- |

|        |                                             |        |        |
|--------|---------------------------------------------|--------|--------|
| 298.15 | Entropy (cal/mole-K):                       |        |        |
| 42.425 | 26.559                                      | 14.654 | 83.638 |
|        | Internal Energy (Kcal/mole):                |        |        |
| 0.889  | 0.889                                       | 42.470 | 44.248 |
|        | Constant Volume Heat Capacity (cal/mole-K): |        |        |
| 2.981  | 2.981                                       | 20.049 | 26.010 |

\*\*\*\*\*
